# Supplementary material for: High-throughput sequencing approach for the identification of lncRNA biomarkers in hepatocellular carcinoma and revealing the effect of ZFAS1/miR-150-5p on hepatocellular carcinoma progression
Source: PeerJ. 2023 Feb 23;11:e14891. doi: 10.7717/peerj.14891 (PMC9968462; doi:10.7717/peerj.14891)
Supplement: Supplemental Information 3 [file peerj-11-14891-s003.xlsx]

## Sheet: supplemental material 3
gene_id	1A	1B	5A	5B	6A	6B
ENSG00000082929	0	4.59119	5.07028	7.67468	0.913997	3.03562
ENSG00000083622	0	4.73771	0	0.913802	0	16.7067
ENSG00000093100	107.619	201.434	84.6134	176.32	245.161	172.355
ENSG00000099869	4.90795	27.0715	120.854	73.0532	0	10.9476
ENSG00000103472	16.4126	37.6514	44.179	64.6027	13.4294	59.9888
ENSG00000115934	0	0	0	0	0	0
ENSG00000116652	3.88321	9.11987	9.04777	12.2745	5.3868	13.5839
ENSG00000116883	29.5925	16.0886	5.45868	20.3761	8.29658	8.97142
ENSG00000117242	48.1599	172.324	121.941	145.695	122.121	154.021
ENSG00000120664	3.49981	1.50539	3.32496	4.35536	0	2.76484
ENSG00000122043	0	0	1.37525	0.45751	0	0
ENSG00000122548	0	0.415919	0.34449	0.561552	0	0
ENSG00000124835	6.55899	4.47142	3.96804	3.85018	1.74852	5.27934
ENSG00000124915	10.1302	3.32968	10.2143	2.85433	9.08365	6.25126
ENSG00000125514	0	0	0	0	0	0
ENSG00000125804	0	0	0	0	3.92196	0.339214
ENSG00000125899	0	0	0	0	0	0
ENSG00000128254	2.67596	2.84371	3.36477	0.783557	2.02184	1.56684
ENSG00000129816	0	0	0	0	0	0
ENSG00000129845	0	0	0	0	0	0
ENSG00000130600	370.543	529.679	135.169	909.795	1579.99	1975.77
ENSG00000131007	0	0	0	0	0	0
ENSG00000131484	33.818	19.5398	20.4999	23.241	7.77983	21.5324
ENSG00000131538	0	0	0	0	0	0
ENSG00000131548	0	0	0	0	0	0
ENSG00000132204	30.1035	1.92913	0	12.6003	33.7785	3.09215
ENSG00000132832	0.974916	1.76125	0	3.63972	3.00534	1.10906
ENSG00000136275	0	0	0.730421	0.425235	0	0
ENSG00000136315	0	0	0.875638	2.03911	0	0
ENSG00000137808	5.93224	0.956874	1.58509	3.69121	10.477	0.702966
ENSG00000145063	0	0	0	0	0	0
ENSG00000146521	89.4161	119.201	34.5143	42.1081	24.6225	50.6766
ENSG00000146666	0.464809	3.29885	1.49035	1.44608	2.98511	3.63525
ENSG00000147753	0	0	0	0	0	0
ENSG00000147761	0	0	0	0	0	0
ENSG00000149443	0	0	0	0	0	0
ENSG00000149656	3.84	0.743274	4.7198	1.67255	5.91873	6.27952
ENSG00000151303	1.08985	0.312523	0	6.93207	1.78871	3.35782
ENSG00000152931	4.50157	0.182668	0.272335	0.880819	0.254554	0.402591
ENSG00000153363	42.9538	27.0731	37.8814	22.7875	15.2281	21.4486
ENSG00000154537	0	0	1.43713	7.80886	0	0
ENSG00000157306	11.8087	15.5875	22.9264	16.3133	112.088	58.7716
ENSG00000161149	2.47212	7.38744	2.78124	5.66712	2.33969	5.18048
ENSG00000162888	19.7588	5.94927	6.617	14.5894	4.90663	5.99399
ENSG00000162913	1.58981	6.64293	18.2054	3.86268	4.95919	3.33721
ENSG00000162947	7.05309	35.578	2.46708	21.3846	3.62372	28.0824
ENSG00000163009	11.1454	3.84471	25.7113	3.02117	1.84261	2.82451
ENSG00000163364	0	1.99818	146.635	0.578109	0.596687	0.220194
ENSG00000163597	207.046	96.9427	421.337	120.532	161.707	173.092
ENSG00000163915	12.0464	3.33846	6.13511	2.61591	26.9997	3.21903
ENSG00000164385	6.01196	3.51299	1.57608	3.52906	0	1.45171
ENSG00000164621	29.6469	8.23986	54.4357	17.4065	19.5281	21.4031
ENSG00000165511	40.2753	57.1801	34.9928	26.5674	83.6458	32.5259
ENSG00000166770	47.3982	37.3064	11.2214	28.1196	44.7564	23.0436
ENSG00000166917	0	0	0	0	0	0
ENSG00000167046	0	0.921562	0	3.37724	0	1.42175
ENSG00000167459	0	0	0	0	0	0
ENSG00000167912	2.21764	1.63523	0	4.13963	2.23806	5.18069
ENSG00000168367	0	0	0	0	0	0
ENSG00000168746	1.60614	15.1298	0	3.39792	0	4.33946
ENSG00000170161	11.6263	9.53435	20.2069	16.2262	15.352	10.9701
ENSG00000170919	60.2783	33.1205	14.241	28.4728	17.2508	27.0243
ENSG00000170983	0	0	0	0.319618	0	0
ENSG00000171671	20.9984	26.6731	32.0864	29.8064	31.607	20.7617
ENSG00000171889	0	0	0	0.922388	0	2.10795
ENSG00000172965	43.9215	11.9992	75.6317	29.9139	49.7252	26.2357
ENSG00000173811	2.16896	1.48174	0.954543	4.92203	1.14714	3.4471
ENSG00000173862	7.56786	14.48	13.1089	17.212	5.02785	16.3277
ENSG00000174171	6.19762	6.92461	5.16993	6.96021	3.39778	8.06063
ENSG00000174365	44.3639	28.3704	690.886	30.0473	43.2415	19.6792
ENSG00000174403	0	0.209759	0	1.61832	0	0.231149
ENSG00000174407	0	0	0	0	0	0
ENSG00000174680	0	0.535753	1.77498	3.10006	0	0
ENSG00000175061	652.892	200.553	3324.65	316.077	263.402	295.055
ENSG00000175147	1.1222	14.9787	6.44678	9.60113	1.98193	20.1465
ENSG00000175170	2.65064	1.20176	2.45015	1.42642	5.52098	2.54675
ENSG00000175604	1.81826	2.16581	8.37135	6.9623	3.05406	5.76778
ENSG00000175611	16.0785	19.7698	35.5844	18.4595	9.10914	16.0122
ENSG00000175728	0	0	0	0.290603	0	0
ENSG00000175746	75.5273	5.55596	0.479353	14.9581	2.53472	7.01539
ENSG00000175772	13.9342	29.0261	58.2946	28.488	38.9915	28.3062
ENSG00000175773	0.315178	5.82948	5.27749	6.27561	0.269886	5.97575
ENSG00000175967	0.367312	9.47963	0	8.68497	0	5.04904
ENSG00000176124	79.973	44.901	17.9283	26.0866	56.4536	27.2107
ENSG00000176236	6.12115	3.53366	4.30411	2.60599	1.44832	2.51965
ENSG00000176320	0	0	0	1.20317	0.532212	6.48125
ENSG00000176349	5.21592	14.5083	3.28291	8.07768	15.0368	9.80692
ENSG00000176515	1.84868	6.74176	0	3.80099	4.8523	0
ENSG00000176593	13.5739	10.7041	8.69788	11.4569	32.4886	11.5722
ENSG00000176659	0.498969	2.89743	0.71106	4.24313	0.427266	1.77382
ENSG00000176728	0.852412	33.2187	37.2621	30.9751	0	0
ENSG00000176753	1.1973	0.463499	1.40763	0.446994	0	0.510763
ENSG00000176754	0	0	0.468149	0	0	0
ENSG00000176840	0	0	0	0.917054	0	1.39718
ENSG00000176868	361.48	196.983	472.71	166.666	161.564	165.407
ENSG00000176912	7.35502	5.11052	39.9097	9.153	13.444	2.41356
ENSG00000176984	7.69514	6.84817	4.53766	9.24605	8.00944	6.0372
ENSG00000177112	0	1.52363	7.15115	0.489793	0.505532	1.679
ENSG00000177133	5.86705	1.46328	41.7342	1.84066	0.189981	2.38368
ENSG00000177234	0	1.96476	2.03417	4.42119	0	3.96937
ENSG00000177335	1.69673	5.35205	1.61196	7.85951	1.21076	7.23822
ENSG00000177337	8.6567	33.3427	15.14	30.8496	61.3233	33.9451
ENSG00000177338	1.08871	0	0	0.54194	0	0
ENSG00000177340	18.7833	7.29495	15.2028	9.98543	19.2072	20.7454
ENSG00000177369	0	0	0	0.936941	0.828899	2.29416
ENSG00000177406	32.0678	58.2355	186.584	61.7099	75.7483	58.3905
ENSG00000177410	173.806	54.6406	398.365	60.8137	129.488	67.7391
ENSG00000177553	0	2.47944	0	0	0	0
ENSG00000177596	0	0.306079	0	2.36144	0	0
ENSG00000177640	3.02737	2.30841	7.47138	3.73318	1.23725	3.36565
ENSG00000177699	0	0.937569	0	1.08502	0.933239	0.619905
ENSG00000177725	7.79539	9.00824	2.73577	5.06769	11.9555	7.94147
ENSG00000177738	14.8759	12.9252	8.26761	13.2055	6.87861	13.1151
ENSG00000177757	12.3371	23.6053	5.45621	12.8824	5.64641	11.2922
ENSG00000177788	37.769	19.1248	50.8423	18.1463	41.1433	14.9564
ENSG00000177800	4.18905	1.31044	1.35674	1.42175	2.77183	0.541526
ENSG00000177822	0.845548	0	0.265799	0.185691	0	0.212182
ENSG00000177993	27.4824	18.3884	9.65502	27.3922	30.7238	13.7503
ENSG00000178107	0	0	0	0	0	0
ENSG00000178130	0	0	0	0	0	0
ENSG00000178243	0	0	0	0	0	0
ENSG00000178248	0	0	3.36605	0	0	0
ENSG00000178412	0	0.320681	0.531215	0	0	0
ENSG00000178440	64.4613	37.0808	18.2615	42.0426	46.8851	30.9226
ENSG00000178457	0	2.93473	0	0	1.16847	8.40838
ENSG00000178722	0.47803	1.32183	0.510915	1.10479	0.701718	0
ENSG00000178734	0	0.610585	0	0	0	0
ENSG00000178803	42.3233	113.654	88.3437	102.095	286.083	105.248
ENSG00000178977	5.56967	25.8394	22.8192	24.7543	28.4454	24.5143
ENSG00000179028	0	0	0	0	0	0
ENSG00000179066	0	2.52923	10.1887	1.10871	8.81141	1.39357
ENSG00000179082	20.8938	6.34387	55.2649	3.05899	6.99113	9.11297
ENSG00000179136	0	0.731358	0	0.806076	0	0.345402
ENSG00000179141	0	2.77582	0	1.74003	0	0.611775
ENSG00000179219	0.352613	7.05272	1.69592	5.26574	4.07621	10.5297
ENSG00000179253	0	0.534414	0	3.60769	0.354631	0.981516
ENSG00000179406	66.4829	57.7372	44.6508	48.8119	29.9534	50.2774
ENSG00000179428	0	0	0	0.755696	0	0
ENSG00000179447	0	1.59319	2.4742	1.3444	0	0.219456
ENSG00000179452	0	0	0	0	0	1.51586
ENSG00000179523	37.2274	25.8915	42.5355	17.0247	18.8497	20.1609
ENSG00000179577	193.087	402.311	0	242.534	382.445	327.073
ENSG00000179676	0	0	0	0.663941	0	0
ENSG00000179743	7.92674	20.6015	21.3591	17.367	27.6764	12.2243
ENSG00000179755	0	0	0	0	0	0
ENSG00000179818	35.4637	49.5398	24.8628	32.8196	41.5022	30.7578
ENSG00000179840	5.30081	4.10411	1.94245	11.497	2.91797	3.87653
ENSG00000179935	1.07319	0.184647	0.76468	0.623252	0.183794	0.50869
ENSG00000180066	0	0	0	0	0	0
ENSG00000180139	46.6666	29.4378	70.9217	20.1858	12.4784	24.7923
ENSG00000180259	0	0	0	0	0	0
ENSG00000180279	0	0	0	0.727944	2.50445	0.554529
ENSG00000180422	0.139407	0.719568	1.11748	0.954175	0.268592	0
ENSG00000180458	8.11302	1.41769	1.89681	0.736188	1.19404	1.08156
ENSG00000180539	1.77056	3.6413	2.54286	6.33472	2.48739	2.98979
ENSG00000180712	2.58144	21.5007	4.13853	10.6596	10.55	13.3483
ENSG00000180769	1.51334	6.60515	2.28346	5.15135	0.628879	6.01284
ENSG00000180846	20.7175	5.55854	7.89245	9.70015	14.2274	7.00041
ENSG00000180861	0	0.090128	0	0	0	0.198637
ENSG00000180869	0	0.370606	0	0	0	0
ENSG00000180910	0	0	0	0	0	0
ENSG00000181097	8.86096	3.08543	7.66663	5.25099	5.05841	2.00003
ENSG00000181123	0.569976	8.9731	22.1744	11.6327	5.85682	7.78081
ENSG00000181171	2.74307	0	5.73609	0	9.80404	0
ENSG00000181211	0	1.1624	0.320924	0	0	0
ENSG00000181798	3.87655	1.11163	5.06395	1.34005	4.42597	3.98119
ENSG00000181800	10.7396	22.5199	6.45659	50.6753	6.89719	37.8608
ENSG00000181908	1.06191	1.97931	0.882748	2.93666	0	2.01337
ENSG00000182057	38.8171	11.5403	27.455	6.15667	21.752	6.49384
ENSG00000182165	59.1057	92.987	204.515	70.5316	53.7319	83.664
ENSG00000182352	0	0	0	0	0	0
ENSG00000182366	0.731219	2.0444	14.6536	1.36496	14.9491	1.81963
ENSG00000182376	8.01888	9.07406	4.74676	9.36505	0.792294	5.0874
ENSG00000182586	23.7906	10.3005	9.53522	19.2831	22.5162	13.354
ENSG00000182648	1.18407	17.7059	7.29536	18.549	25.9442	13.6679
ENSG00000182776	0	0	0	0	0	0
ENSG00000182824	0.27702	0	0	0	0.118606	0
ENSG00000182873	4.77675	12.1224	7.82822	29.9204	7.36257	19.9247
ENSG00000182912	1.18614	1.5306	2.1454	3.29283	63.1679	8.95236
ENSG00000183154	2.91185	23.0572	3.39509	10.871	4.42013	11.8572
ENSG00000183242	14.845	1.47354	0.212257	0.432499	0	0.8472
ENSG00000183250	19.543	8.71911	21.554	14.1006	9.21292	12.1211
ENSG00000183308	19.5793	28.1945	32.1475	18.3624	25.513	27.4381
ENSG00000183385	0	0	0	0	0	0
ENSG00000183470	0	0	0	0	0.290443	0
ENSG00000183535	34.8417	13.3023	78.3206	9.94471	25.6607	13.2952
ENSG00000183562	81.7856	43.9936	45.1993	55.1784	64.3695	74.1767
ENSG00000183643	0	0	0	0	0	0
ENSG00000183674	0	0	0	0	0	0
ENSG00000183822	0	0	0	0.564187	0.582316	0
ENSG00000184029	0	0	0	0	17.2654	0
ENSG00000184068	60.78	15.2571	36.0347	16.8979	47.5767	18.6518
ENSG00000184224	0	0.585499	1.57608	0	2.33118	0
ENSG00000184274	2.13936	4.90781	2.92168	3.69769	10.8389	1.18306
ENSG00000184385	0	0	0	0	0	0
ENSG00000184441	55.4856	25.8574	20.4679	27.6987	16.4528	27.322
ENSG00000184566	0	0	0	1.18684	0	0
ENSG00000184608	0	0	0	0	0.371536	1.23397
ENSG00000184809	0	2.83208	0	0	0	4.05714
ENSG00000184856	0	0	0	0	17.5608	0
ENSG00000184991	0	0	0	0	0	0
ENSG00000185065	28.7024	11.723	22.3745	8.8478	13.1908	2.4339
ENSG00000185168	11.0589	8.91906	40.9661	15.0135	59.7239	9.47116
ENSG00000185186	0	20.8846	0.512532	12.0846	70.2178	36.8228
ENSG00000185203	0	0	0	0	0	0
ENSG00000185433	2.45177	1.05459	0	1.35605	0	0
ENSG00000185700	0	0	0	0	0	0
ENSG00000185837	11.3764	4.51697	21.0445	9.25677	4.49611	1.24439
ENSG00000185847	0	0	0	0	0	0
ENSG00000185904	1.77212	2.59165	5.80836	2.79341	0.758731	0.503988
ENSG00000186019	135.436	86.5154	103.045	105.008	155.456	83.8566
ENSG00000186056	10.6349	6.90595	3.59329	4.78157	5.55212	7.2199
ENSG00000186235	0	1.5938	0	1.06411	0.366102	0
ENSG00000186594	21.8214	29.9482	22.1367	32.1037	6.65081	17.0927
ENSG00000186615	7.44961	4.65785	15.4317	7.0725	5.91873	6.66175
ENSG00000186825	0	0	0	0	0	0
ENSG00000186842	11.1805	15.2289	1.32774	5.02437	0.997274	2.20814
ENSG00000186960	0	0	0	0	0	0
ENSG00000187012	0	0	0	0	0	0
ENSG00000187013	2.88728	2.79432	16.7796	1.12284	8.80782	1.28303
ENSG00000187185	7.31381	11.7972	11.5858	13.0024	24.8275	16.3431
ENSG00000187229	9.81258	37.8131	39.7955	95.8505	70.4427	77.795
ENSG00000187600	0	0	0	0.231686	0	1.05895
ENSG00000187621	2.32563	3.91142	0.139641	0.780442	2.92001	0.631678
ENSG00000187904	2.80301	0.602836	1.99723	6.97644	3.60031	6.64309
ENSG00000187951	63.6241	1.76969	39.7327	4.6324	3.39721	3.20381
ENSG00000187979	0.742594	0	0	0	0	0
ENSG00000188004	8.37402	4.7673	8.81848	14.7121	2.53082	9.98152
ENSG00000188185	34.4788	7.77745	2.0841	9.92715	7.74154	11.5954
ENSG00000188242	54.2011	5.15222	191.606	47.079	96.5426	4.68403
ENSG00000188280	0	0	0	0	0.471583	0
ENSG00000188365	27.4996	17.9794	54.4721	21.9021	48.0376	21.8984
ENSG00000188511	0.693402	1.63164	0.959075	6.04036	7.07271	8.12009
ENSG00000188525	7.89828	3.10191	0.244685	0	0.882166	0.488317
ENSG00000188660	0	3.03788	0	0	27.2987	0
ENSG00000188693	2.98785	1.80728	3.59257	5.57738	2.8783	1.19495
ENSG00000188825	4.52486	10.231	6.93322	7.17577	9.77227	4.3275
ENSG00000189196	1.03747	0.502033	0.55442	0.484156	0	0
ENSG00000189223	58.4191	47.0043	40.0082	38.4684	22.9522	8.45488
ENSG00000189229	0	0.353565	0	0	0.234622	0
ENSG00000189238	0.709212	2.28793	0	2.38297	2.18627	3.42888
ENSG00000189275	0	0.315848	0	0	0	0
ENSG00000189295	0	0	0.999458	0.290931	0	0
ENSG00000189316	15.0787	2.68381	2.2229	1.61765	0	2.5878
ENSG00000189419	5.88402	12.8493	6.16787	8.37852	17.7315	13.7573
ENSG00000196096	1.11909	0.618893	0	0	0	0
ENSG00000196167	6.48113	4.93638	104.04	5.27207	19.0046	8.0922
ENSG00000196243	0	0	0	0	0	0
ENSG00000196273	0	0.538019	0	0	0	0.592882
ENSG00000196295	45.3728	34.9372	57.0263	45.1985	32.3206	38.3289
ENSG00000196366	18.2419	8.16956	15.1387	5.34146	36.5243	8.54488
ENSG00000196566	2.59768	4.30979	0	5.54177	7.62647	6.33236
ENSG00000196634	0	0	0	0	0	0.866681
ENSG00000196668	1.60443	1.20772	0	2.32942	0.85867	0.760497
ENSG00000196696	137.055	224.464	73.0727	261.373	162.003	316.448
ENSG00000196741	20.272	6.53978	20.0181	11.7912	18.1136	9.71333
ENSG00000196756	86.9314	31.6614	68.3797	28.1537	82.4309	31.5136
ENSG00000196758	0.223862	0	0	0	0	0
ENSG00000196810	21.3251	6.51502	76.6027	4.70129	7.84541	6.32589
ENSG00000196893	0	0	1.58544	0	0	0.527343
ENSG00000196951	1.26019	0.739162	1.46933	0.285137	0	1.62907
ENSG00000196979	1.77963	1.09354	0	0.316381	0	0
ENSG00000197085	2.91405	0	0.207634	0.145056	1.49717	0.16575
ENSG00000197099	104.727	295.415	222.135	230.628	167.81	207.322
ENSG00000197176	0	0	0	0	0	0
ENSG00000197180	9.69569	3.57468	88.8231	8.04391	13.0466	16.4133
ENSG00000197182	30.5595	30.1043	95.5127	33.0513	24.579	15.4219
ENSG00000197210	3.08487	1.17948	1.2822	0.568739	0.293508	0
ENSG00000197251	0.786226	0	0	2.7722	0	0
ENSG00000197291	12.5197	9.74459	2.19477	9.1503	5.78572	3.67362
ENSG00000197301	14.37	0	0	0.512565	9.75778	0.325383
ENSG00000197308	0	0	0	0	0	0.496551
ENSG00000197322	0	1.69358	0.369139	0.257886	0	0.785802
ENSG00000197332	31.829	14.7439	44.7476	12.5939	3.66895	13.8103
ENSG00000197462	0	0	0	0.821003	0	0
ENSG00000197503	0	0	0	0	0	0
ENSG00000197536	17.9088	50.2112	35.4605	52.8029	35.361	60.3358
ENSG00000197585	2.27865	0	0.405901	0	0.4878	1.08007
ENSG00000197595	2.34084	0.476943	0	0.766599	0.791233	0.525578
ENSG00000197644	0	0	0	0	0	0
ENSG00000197665	0	0	8.94212	5.44254	0	0
ENSG00000197670	69.4103	33.036	37.9772	36.666	134.51	33.8941
ENSG00000197813	34.1192	48.0828	145.866	75.4221	152.808	44.6869
ENSG00000197815	10.192	25.911	20.323	18.9306	31.2622	39.3688
ENSG00000197880	0.386689	1.33063	0.413291	1.12284	0	1.09974
ENSG00000197934	1.78462	4.98959	1.43055	5.64475	0.382042	4.22953
ENSG00000197989	23.1698	12.5273	27.8765	19.8937	17.7066	24.2043
ENSG00000198054	0	0	0	0	37.5542	0
ENSG00000198106	6.30357	107.001	5.08353	88.3577	10.3784	104.059
ENSG00000198221	31.5605	15.687	22.7377	12.51	16.3653	13.1312
ENSG00000198358	3.23146	0	0	0	2.65641	0
ENSG00000198454	0	0.728581	6.93974	0	0	0
ENSG00000198468	46.492	2.76362	61.9937	8.21772	55.8194	9.26318
ENSG00000198491	0	0	0	0	0	0
ENSG00000198496	125.534	69.6914	62.3687	43.2766	45.6824	32.5923
ENSG00000198590	33.7032	12.4094	12.9678	9.28318	16.3924	13.6748
ENSG00000198671	0	0	0	0	0	0
ENSG00000198685	0	0.132101	0	0.127397	0	0.436715
ENSG00000198711	8.31235	31.7716	20.13	42.9487	41.761	55.2103
ENSG00000203258	8.78045	4.40624	11.4699	9.71278	4.38589	7.63016
ENSG00000203266	0	0	0	0	0.460559	0
ENSG00000203279	17.8127	6.18842	3.29505	3.83661	8.79977	2.43552
ENSG00000203280	36.3512	43.5573	8.94212	43.0833	61.1432	46.7682
ENSG00000203288	21.536	2.18574	19.6554	3.61356	10.5674	1.72045
ENSG00000203307	7.43694	13.1954	6.95498	12.1471	22.6868	7.93145
ENSG00000203321	21.504	11.3969	24.2146	8.12382	11.3442	16.3814
ENSG00000203325	4.86708	8.56433	4.25611	6.60749	8.52478	11.9544
ENSG00000203327	12.0566	5.05632	4.83226	9.37745	1.93576	12.8583
ENSG00000203334	0	0	0	0	0	0.943766
ENSG00000203335	0	0	0	0	0.717876	0
ENSG00000203356	0	0.602326	0	0	0.449659	1.82531
ENSG00000203362	15.3387	1.79937	4.76913	3.81766	12.1792	1.18972
ENSG00000203364	0	0	0	0	0	0
ENSG00000203392	5.75983	10.9872	4.8178	13.7124	5.78989	11.2173
ENSG00000203395	1.55987	2.76768	0.416794	3.15443	2.7549	2.49538
ENSG00000203402	0	0	0	0	0	0
ENSG00000203434	0	0.619611	0	0	0	2.04838
ENSG00000203441	11.3985	6.1286	2.36884	5.91037	2.84681	0
ENSG00000203446	45.2106	22.9336	6.49831	22.893	42.2513	32.3662
ENSG00000203469	33.1079	36.6194	29.6986	41.2013	44.0441	30.2652
ENSG00000203472	0	0	0	0	0	0
ENSG00000203496	6.45617	1.47019	0.811802	0.472613	0	2.70018
ENSG00000203497	28.3904	13.7382	54.2389	34.4473	11.8514	21.1947
ENSG00000203498	0	0	0	0	0	0
ENSG00000203506	1.19885	7.58034	8.2005	12.2338	1.38588	17.7295
ENSG00000203520	0	0	0	0	0	0
ENSG00000203527	0	0	0	0	0	0
ENSG00000203565	0	0	0	0	0	0
ENSG00000203585	0	0	0.39958	0	0	0
ENSG00000203588	7.64104	3.28668	2.72223	10.7768	7.1973	2.89747
ENSG00000203593	0	3.3985	0.938283	0	0	1.87253
ENSG00000203601	0	1.26227	0.261373	0	0	0
ENSG00000203605	0	0	0	0	0	0
ENSG00000203620	0	1.89425	0	0	0.628499	0
ENSG00000203635	0.504746	0.868436	0.899116	0	0	0
ENSG00000203643	0	13.7627	0	4.49557	8.39624	6.84921
ENSG00000203644	47.6342	61.0759	147.869	63.0544	38.9704	59.5381
ENSG00000203645	0.269889	0.348266	0	0	2.25327	0.575669
ENSG00000203650	6.65034	13.1954	3.51571	4.98343	29.6674	10.1685
ENSG00000203684	10.7682	12.2279	5.98466	1.60806	5.53246	1.22498
ENSG00000203688	103.027	10.3188	5.11276	1.95474	8.07021	3.95957
ENSG00000203706	0	0	6.46612	0	3.17896	0
ENSG00000203709	55.8748	171.36	13.1331	74.7216	41.5193	97.333
ENSG00000203711	0.342127	0.662223	4.02229	0	0	0.729752
ENSG00000203721	16.0926	19.9802	23.2428	14.8304	40.7814	12.1221
ENSG00000203729	0	0	0	0	7.18846	1.59165
ENSG00000203739	67.2697	71.505	58.1904	54.2035	110.958	27.8713
ENSG00000203801	1.08404	1.29125	0.891241	1.03772	1.39239	3.20156
ENSG00000203804	43.6995	84.3812	95.8874	96.8394	82.9095	87.8948
ENSG00000203808	2.91118	0.601056	0	0.144913	0.44871	0.331174
ENSG00000203809	0	0	0	0	0.74398	0
ENSG00000203864	0	0	0	0	0	0
ENSG00000203865	26.6212	35.2218	203.85	36.6235	22.7956	26.0353
ENSG00000203875	39.9484	36.0593	379.011	91.8362	94.5345	95.2833
ENSG00000203876	1.44072	1.18666	0.655246	0.991821	1.02369	0.958959
ENSG00000203897	0	0	0	0	0	0
ENSG00000203900	0	8.56734	0	9.47139	0	7.8291
ENSG00000203930	114.737	0.950037	19.4165	2.40356	0.8474	1.76752
ENSG00000203971	0	0	0	0	0	0.847048
ENSG00000203987	0	0	0	0.101865	0	0.232794
ENSG00000203993	52.1657	34.1798	51.5511	25.1899	43.0846	27.3032
ENSG00000203999	55.604	23.2868	29.5677	24.8515	87.1869	31.1324
ENSG00000204011	0	3.18104	1.75649	0	2.1109	2.33694
ENSG00000204044	12.5498	0	2.76154	1.22492	0	0
ENSG00000204049	24.2769	15.0148	17.9633	9.83217	13.2848	4.90248
ENSG00000204054	75.6954	41.63	47.9681	43.7998	27.7329	49.6906
ENSG00000204055	0	0.93429	2.57946	0	0	0.857969
ENSG00000204091	0	0	16.2418	0	0	0
ENSG00000204092	0	0	30.3612	0	1.92038	0
ENSG00000204110	0	1.32691	0	3.83899	0.660392	2.19333
ENSG00000204117	0	0.506074	0	0.488054	9.06726	0
ENSG00000204148	0	0	0	0	0	0
ENSG00000204183	0	0	2.3825	0	0	0.67925
ENSG00000204241	0	0.265086	0.73187	0.426078	0	0.778981
ENSG00000204250	0	0	0	0	0	0
ENSG00000204261	22.3594	48.5748	9.68004	56.5312	21.8122	27.7702
ENSG00000204277	1.22333	0.24286	0	1.52238	3.26347	0.267625
ENSG00000204282	24.2102	44.1096	14.6808	54.8713	19.1736	42.2752
ENSG00000204283	0	0	0	0	0	0
ENSG00000204362	0	0	0	0	0	0
ENSG00000204380	27.3558	15.1026	16.1762	15.7932	22.9417	15.9743
ENSG00000204393	0.317352	0.409513	0	0	0	0
ENSG00000204398	0	0	0	0	0.49948	0
ENSG00000204446	0	1.75993	0	0	0	1.21212
ENSG00000204460	0	0	0	0	1.12174	0
ENSG00000204464	11.36	12.1096	26.3945	13.5223	5.07522	26.6888
ENSG00000204528	0.931185	31.8425	1.49287	34.7646	21.529	15.8896
ENSG00000204581	0.482686	0.41524	0.257946	1.30148	1.23997	0.571979
ENSG00000204584	9.72911	35.2883	26.4176	28.6325	20.4335	16.639
ENSG00000204588	8.21167	14.4889	37.1661	16.8927	7.211	13.7025
ENSG00000204603	0.215532	0	0	0	1.24578	0
ENSG00000204620	45.2617	16.2239	27.9502	17.5237	21.9626	15.0177
ENSG00000204625	4.73308	4.07173	0	6.38095	2.53308	8.413
ENSG00000204666	9.77652	1.63537	1.93502	1.12652	6.51125	0.772341
ENSG00000204684	0	0.235788	0	0.530582	0.156466	0.779497
ENSG00000204685	67.5842	35.4911	145.598	60.8486	73.3719	39.1102
ENSG00000204706	1.79174	4.04613	1.46617	2.57814	0.970901	2.03031
ENSG00000204709	0	0	1.89972	3.68658	1.52202	0
ENSG00000204754	0	0	0	0	0	0
ENSG00000204758	2.48288	4.48549	3.82131	1.35953	0.637825	0.282451
ENSG00000204792	14.5453	1.7063	0.21199	0	2.71748	1.8803
ENSG00000204802	10.1918	8.41701	34.6396	16.2346	6.02178	8.84053
ENSG00000204814	0	0	0	0	0	0
ENSG00000204832	0	2.4668	0	6.45718	15.0832	2.52418
ENSG00000204850	1.52234	3.57169	2.9583	12.7447	1.42208	7.28143
ENSG00000204860	6.31569	0.740891	59.5243	0.803823	0	2.04111
ENSG00000204876	1.95967	28.3785	0	14.0904	0.839032	56.5069
ENSG00000204904	7.78467	5.35753	8.87489	3.87507	13.9986	3.68991
ENSG00000204929	1.24798	2.55769	2.9815	3.19746	0.377166	2.08778
ENSG00000204934	24.6649	32.4773	13.3602	27.0403	67.0253	18.9682
ENSG00000204949	1.22983	16.3987	1.09536	14.7945	11.8474	9.32696
ENSG00000204960	0.112417	0	0	0	0	0
ENSG00000204971	2.89409	11.9506	7.42365	5.0422	1.48692	6.5846
ENSG00000204990	2.49427	0	0.820264	0	0	1.09133
ENSG00000205015	0	0	0	0	0	0
ENSG00000205018	1.67608	2.35944	1.13997	3.22352	2.15284	2.38337
ENSG00000205037	0.610833	4.82786	3.99873	4.56093	3.92291	3.25724
ENSG00000205041	128.606	74.3257	13.5233	39.0122	74.4676	36.253
ENSG00000205054	1.33749	0	5.78608	0.554816	0.818064	0
ENSG00000205056	0.805476	5.29754	0.305476	5.46458	0.333739	2.62329
ENSG00000205106	1.70167	17.0178	21.3702	34.9413	29.507	30.247
ENSG00000205174	0	0	0	0	0	0
ENSG00000205181	46.7179	13.8118	9.09556	10.5359	12.0013	13.1617
ENSG00000205231	0.23451	0.806967	0.584833	0.194558	0	0.333471
ENSG00000205293	0	0	0	0	0	0.322469
ENSG00000205300	0	0	0	0	0	0
ENSG00000205325	0	0	0	0	0	0
ENSG00000205334	0.289611	0	0	0	0	0
ENSG00000205396	0	0	0	0.0829927	0	1.04316
ENSG00000205414	2.2365	5.62769	0	11.4112	5.1708	6.04255
ENSG00000205424	0	0.513959	0	0.793052	0	0.792916
ENSG00000205444	0	0.623405	0.774514	0	0	0
ENSG00000205452	0	0	0	0	0	0
ENSG00000205488	0.17412	4.6435	0	0.866739	4.62205	1.73318
ENSG00000205500	3.55489	9.03548	2.53296	5.09419	3.32077	4.59547
ENSG00000205537	3.00338	1.10731	0	1.86879	4.40877	0.915167
ENSG00000205559	21.9649	9.75264	19.4371	12.6385	18.2017	9.40375
ENSG00000205562	0	0	1.32598	1.40355	0	3.68871
ENSG00000205611	0	1.19502	0	0	0	0.965714
ENSG00000205622	0.526901	4.66876	0.11263	3.89052	1.62426	7.04294
ENSG00000205628	0	0	0	1.38067	73.3894	0.676131
ENSG00000205632	0	2.66209	0.146994	2.05384	0	0
ENSG00000205634	0	0	0	0	2.71275	0
ENSG00000205636	0	0	0	0	0	0
ENSG00000205653	0.390702	0	0	0	0	0
ENSG00000205682	0	1.19958	0	0	0	0.566532
ENSG00000205696	0	0.950069	2.88532	0	0	0
ENSG00000205740	18.2433	6.17239	15.6343	5.60652	5.14372	1.74
ENSG00000205745	0	0	0	0	0	0
ENSG00000205786	0	0.260245	0	0.250979	0	0
ENSG00000205790	31.2867	26.799	15.4704	33.3408	20.555	17.3867
ENSG00000205791	1.25498	4.85831	24.7186	5.13153	2.3028	2.29445
ENSG00000205830	0	0	0	0	0	0
ENSG00000205837	0	2.58875	0.40203	0	0	0.713182
ENSG00000205853	7.71219	1.99037	0.494564	0.383899	3.56612	3.948
ENSG00000205861	9.43329	1.78138	18.9349	3.4359	3.84183	9.48799
ENSG00000205865	14.7493	484.161	19.9124	405.417	246.945	334.47
ENSG00000205866	15.6088	410.097	11.8966	310.473	288.404	337.482
ENSG00000205885	135.647	145.691	33.4603	140.278	58.3098	131.814
ENSG00000205890	0	1.04753	10.2187	0.561238	0	2.95
ENSG00000205913	10.1333	7.17661	14.5077	5.748	7.62777	4.69144
ENSG00000205930	2.83661	5.79559	2.10538	4.11837	1.21449	6.83476
ENSG00000205959	0.981967	9.18673	12.2444	6.41558	5.67577	5.93448
ENSG00000205971	3.98489	7.10103	0.405622	13.2241	5.11838	16.9995
ENSG00000206028	0	0	0	0	0	0
ENSG00000206062	0	0	0	0	0	0
ENSG00000206129	0.864692	0.669482	0.646925	0	7.44136	0.614793
ENSG00000206142	0	0	0	0	0	0
ENSG00000206187	0	0	0	0	0	0
ENSG00000206195	0.448127	2.24881	23.3624	0.309819	83.4613	5.16867
ENSG00000206249	0	1.32609	0	0	0	0
ENSG00000206337	52.9668	139.082	51.6266	142.451	51.3073	123.988
ENSG00000206344	14.9126	19.2433	28.917	22.1371	14.3658	11.0572
ENSG00000206417	11.5444	18.9597	111.91	29.8381	34.1151	31.5692
ENSG00000206532	4.659	0	0	0	1.04074	3.45655
ENSG00000206552	2.84635	2.17038	0	2.57612	0	1.28784
ENSG00000206567	15.914	4.07896	6.6404	2.71291	5.04015	2.63494
ENSG00000206573	83.7749	38.6084	29.2033	33.8935	34.1915	34.662
ENSG00000207751	22.4818	6.84519	8.9094	6.9158	10.7071	9.33922
ENSG00000207955	8.26086	2.84263	4.90509	2.74141	3.30108	1.82729
ENSG00000211683	2.03199	4.26089	1.62883	1.89654	2.93622	2.1671
ENSG00000212663	0	0	2.71222	0	0	0
ENSG00000212694	39.3564	28.0227	57.5611	39.4978	15.9635	13.3023
ENSG00000212743	5.30303	11.7934	11.9387	25.5551	1.59417	21.0182
ENSG00000212766	0	2.09223	218.677	1.6334	1.48754	0
ENSG00000212855	0	0	0	0	0	0
ENSG00000212856	0	0	0	0	0	0
ENSG00000212930	0	0	0	3.12923	0	0
ENSG00000212939	0.354515	1.18942	1.21249	2.02942	2.45892	7.56176
ENSG00000212978	46.5341	18.3352	87.2267	25.7499	14.7145	28.4131
ENSG00000213057	45.8668	34.4079	30.5192	14.115	57.3799	13.0161
ENSG00000213062	35.4591	44.9745	16.8438	33.9441	105.105	41.3724
ENSG00000213121	0	0.587914	0	0	0	0
ENSG00000213279	0.696334	3.59421	0.744237	3.17737	4.77015	5.77605
ENSG00000213373	6.49788	84.8355	2.85966	37.8948	20.4563	37.6844
ENSG00000213468	62.5107	0.730862	0.892088	0.964514	3.79059	0.847779
ENSG00000213599	121.971	55.8637	44.6059	29.508	63.9889	36.1018
ENSG00000213600	21.8169	22.3279	47.4395	45.8744	30.9215	43.8607
ENSG00000213742	133.835	83.6994	184.125	79.2302	159.41	80.474
ENSG00000213863	0	0	0	0	0	0
ENSG00000213888	9.23637	3.66728	29.6153	7.25022	5.84055	3.83918
ENSG00000213904	5.31459	9.39797	3.15567	11.5945	11.1243	10.4496
ENSG00000213963	13.9761	9.2907	17.5301	10.7806	4.30245	5.80342
ENSG00000213981	0.630645	1.95309	0	0	0.324012	0
ENSG00000213994	3.78214	3.25366	10.1058	3.13781	4.0483	8.96362
ENSG00000214039	0	13.2431	0	0	0	0
ENSG00000214043	0	0	0	0	0	0
ENSG00000214049	1.13045	3.60395	0.852861	2.8136	0.256236	8.88849
ENSG00000214106	43.3537	59.3872	24.848	49.1297	33.7117	45.7946
ENSG00000214145	0.332406	0.171575	0	0.413664	1.0247	0.378143
ENSG00000214146	2.83782	1.22065	5.81334	1.91292	1.36688	2.18582
ENSG00000214184	21.0787	20.5115	25.8527	13.7608	19.0853	7.86196
ENSG00000214188	53.0636	35.0392	51.6186	35.9841	41.2671	38.7596
ENSG00000214248	35.3058	14.9607	94.3989	19.9382	44.2259	16.2378
ENSG00000214293	41.8598	32.1798	34.2685	24.7163	22.6506	33.8148
ENSG00000214353	13.8816	5.28578	9.24246	8.92073	16.0764	5.42028
ENSG00000214381	0	0	0	0.285295	0	0
ENSG00000214401	21.2164	13.8714	29.0252	26.0509	24.3445	25.3424
ENSG00000214407	1.21154	0	0	1.50771	0	4.59413
ENSG00000214432	0	0.311703	0.6024	0.300603	0	0.915968
ENSG00000214546	0	0	0	0	0	0
ENSG00000214548	720.152	23.6863	11.2196	51.0709	39.7173	51.9497
ENSG00000214559	0	0	2.2299	1.73093	0	0.988933
ENSG00000214614	0	0	0	0	0	0
ENSG00000214650	8.39919	10.2825	42.1228	13.9366	16.5974	16.231
ENSG00000214691	0	0	0	0	0	0
ENSG00000214708	14.8495	7.12998	13.841	7.52072	8.87131	9.0847
ENSG00000214719	14.2256	9.97526	41.0662	9.7339	10.7517	9.04114
ENSG00000214770	1.81263	0.212639	1.76121	0.820268	0	0.820127
ENSG00000214772	5.04285	3.79594	4.04233	2.09187	1.61932	7.1709
ENSG00000214773	35.3821	14.7201	7.64589	12.5117	14.1554	19.2454
ENSG00000214783	20.8391	22.9395	31.9999	20.7466	27.2036	25.0973
ENSG00000214788	0	0	0	0	0	0
ENSG00000214797	0	0.635073	0	0	0.505712	0.699833
ENSG00000214803	0.693129	0	1.23469	0	0	0
ENSG00000214851	10.1056	18.8361	1.60013	24.531	6.08946	25.7243
ENSG00000214870	2.10884	1.88395	1.73378	0.807496	0.208361	2.30674
ENSG00000214894	1.90762	6.72838	0.951465	6.33053	0.326698	0
ENSG00000214900	0.916394	4.10262	3.8178	6.58646	1.27314	5.90386
ENSG00000214915	0	0	0	0	0	0
ENSG00000214919	0.870966	0.899119	0	0	0	0
ENSG00000214922	41.2262	19.0116	56.7019	15.1281	15.8689	15.9711
ENSG00000214942	0	0	0	0	0	0
ENSG00000214955	1.71488	0.442579	0	1.70728	0	3.41397
ENSG00000214970	0	0	0	0	0	0
ENSG00000214999	7.65234	0	0	2.8569	1.57264	1.95868
ENSG00000215014	5.05413	2.57841	2.38685	2.34033	1.50971	3.17562
ENSG00000215022	11.2566	12.8099	7.76802	2.09573	13.32	14.1162
ENSG00000215023	0	1.44632	0	0	3.35915	1.06253
ENSG00000215039	38.286	43.7642	50.4361	29.6146	14.0355	33.4941
ENSG00000215067	26.6913	32.0061	66.1361	24.9922	36.9292	18.3062
ENSG00000215068	26.2854	16.7024	12.4506	20.5683	17.3926	23.2194
ENSG00000215112	0	1.11861	0	0	0	1.23267
ENSG00000215117	0	0	0	0	0	0
ENSG00000215159	1.87502	0	0	0	0	2.66626
ENSG00000215162	0.508231	0	0	0	0	0
ENSG00000215196	0	0.605706	0	0	0	0.400483
ENSG00000215231	0	0	0	0	0	0
ENSG00000215241	11.2652	13.2615	35.0644	12.0515	3.80777	12.9276
ENSG00000215244	1.78935	6.92695	22.28	32.9561	3.5624	21.3733
ENSG00000215246	0.396462	6.03684	209.834	7.30202	0	1.9168
ENSG00000215256	35.7319	223.007	134.856	95.8188	90.3109	140.849
ENSG00000215304	3.52356	0.324773	2.15198	4.69813	0.323273	2.86313
ENSG00000215374	3.30753	3.73455	38.4439	4.52769	8.6029	3.64504
ENSG00000215386	13.9592	27.6472	1.61152	22.7587	1.34318	26.1092
ENSG00000215403	0	0	0	0	0	0
ENSG00000215417	100.176	49.6868	24.5908	33.9457	56.8709	27.2081
ENSG00000215424	58.886	20.8472	20.9531	17.3037	30.6367	17.1911
ENSG00000215458	12.6322	6.50566	8.83938	8.95279	4.72938	8.86063
ENSG00000215481	8.22751	17.7628	11.4992	21.2651	11.3807	4.94977
ENSG00000215483	2.04605	4.62041	0.771813	1.348	2.39615	2.88807
ENSG00000215498	0	0	0	0	0.221887	0
ENSG00000215533	0.507997	10.8161	2.71472	10.1149	6.52494	6.86249
ENSG00000215560	0	0	0	0	0	0
ENSG00000215692	35.6819	67.1792	85.6511	144.133	188.585	116.451
ENSG00000215765	0	0.550659	0	0	0.548115	0
ENSG00000215769	114.874	72.5921	74.5981	101.561	140.078	87.6192
ENSG00000215808	0	0	0.2476	0.634248	4.28485	0.197654
ENSG00000215841	0	4.0795	0	1.31141	0	0
ENSG00000215866	2.12032	2.54064	4.20863	2.07322	0.972657	0.646089
ENSG00000215881	0	0	0	0	0	0
ENSG00000216560	0	0	0	0	0	0
ENSG00000216863	0.344936	1.14456	0.421331	0.981159	0.316465	1.12113
ENSG00000216895	120.716	40.8726	16.854	34.6804	37.7155	29.7693
ENSG00000217258	19.0026	10.8181	11.3496	9.73736	7.89663	5.56325
ENSG00000217455	0	0	0	0	0	0
ENSG00000217576	28.1479	21.2114	20.7558	20.5466	29.1477	18.6167
ENSG00000217702	5.46077	0.281864	6.5368	3.53375	2.80562	1.55303
ENSG00000217825	0	0	0	0	0	0
ENSG00000218018	5.01993	11.1047	10.9222	11.3786	15.1985	19.1204
ENSG00000218109	0	0	21.5309	0	0.401166	0
ENSG00000218357	1.0132	0	1.62435	1.5761	0	0
ENSG00000218416	0.51208	0.66079	2.28045	2.44283	1.4251	2.54861
ENSG00000218510	5.28133	7.85625	28.7721	11.0453	12.2481	13.977
ENSG00000218537	155.444	157.621	581.983	143.628	202.543	119.165
ENSG00000218672	2.31415	0	0	0	2.51511	0
ENSG00000218839	0	0	0	0	0	0
ENSG00000219159	0.162505	0	0	0	0	0
ENSG00000219410	64.4493	30.2961	83.7667	39.959	55.4341	32.8945
ENSG00000219445	0	0	0	0	0	0
ENSG00000219665	30.1878	15.606	21.1924	16.9753	13.4868	15.4643
ENSG00000220161	0	0.952101	0.630871	0.734558	0	0
ENSG00000220256	0	0.220059	0	0.318335	0	0
ENSG00000220575	0	0	0	0	0	0
ENSG00000220702	0	0	0	0	0	2.59146
ENSG00000220891	0	0	2.94047	0	0	0
ENSG00000220908	0	0	0	0	0	1.98621
ENSG00000220925	8.61119	2.77798	2.87612	8.03719	0	0
ENSG00000221571	24.8735	9.62908	1.32923	4.6431	18.3705	6.18974
ENSG00000221817	15.924	17.7292	13.3353	9.0625	8.48071	22.3676
ENSG00000221819	6.66631	6.81011	13.6561	24.1965	8.91928	13.0342
ENSG00000221845	0	0	0	0	0	0
ENSG00000221857	43.5744	1362.09	770.446	1058.35	1360.62	1145.24
ENSG00000221949	18.7859	13.039	58.2575	24.7951	18.6455	6.47598
ENSG00000221953	7.58103	6.94249	12.2845	3.49981	10.5227	1.21712
ENSG00000221990	15.9382	11.9973	46.313	13.8428	48.6204	7.0825
ENSG00000222000	0	0	0	0	0	0
ENSG00000222001	51.9591	70.9923	398.535	19.4405	63.6852	24.1455
ENSG00000222004	5.30693	3.68743	6.54463	4.06415	1.92259	6.77241
ENSG00000222005	1.80777	2.96897	1.31737	2.14744	0.738814	0.81793
ENSG00000222007	13.8048	10.6883	11.3118	10.8803	18.9136	14.3956
ENSG00000222012	0	0.515446	1.45154	0.497092	1.33397	0
ENSG00000222017	1.33768	0	0.57188	0	4.12361	0
ENSG00000222020	6.30563	5.81201	14.4416	5.60505	1.15703	1.28093
ENSG00000222022	0	0	0	0	0	0
ENSG00000222030	0	0	0	0.843786	0	0
ENSG00000222031	0	0	0	0	0	0
ENSG00000222032	0	0	1.63636	0	0	0
ENSG00000222033	16.6936	16.9976	0.975735	19.3137	37.8585	12.0545
ENSG00000222035	0.624854	0.460751	0	0.444345	0	0.888537
ENSG00000222041	10.0339	5.92015	21.3983	7.78723	9.8013	11.8716
ENSG00000222042	0	0	0	0	0	0
ENSG00000222043	9.40609	13.5656	19.515	33.0507	38.3769	30.6847
ENSG00000222044	0	1.68851	0.279706	2.9311	0	2.60497
ENSG00000223342	0	0	0	0	0	0
ENSG00000223343	153.583	76.0845	66.0368	71.6178	52.1516	70.7897
ENSG00000223344	0	0	0	0	0	0
ENSG00000223351	0	3.84866	0	0	0	0
ENSG00000223356	3.82581	7.40528	2.0445	3.17404	6.55207	8.16041
ENSG00000223358	13.0266	272.665	7.77504	137.478	83.0079	189.567
ENSG00000223360	0	0	0	0	0	0
ENSG00000223373	0	0.597779	0	0	0	0
ENSG00000223374	85.5774	60.4541	210.302	112.716	83.4425	109.255
ENSG00000223379	0	0	0	2.09506	0	0
ENSG00000223381	0	0	0	0	0	0
ENSG00000223382	0	0.865798	0	0.417484	0	0
ENSG00000223387	0.677629	4.37208	0.402359	4.40379	18.4714	5.56737
ENSG00000223390	14.8556	21.5075	29.8188	24.3489	13.031	18.0331
ENSG00000223392	0	0	0	0	0	0
ENSG00000223393	3.82501	0.897421	7.06135	0.865465	2.23319	2.47233
ENSG00000223400	0	0	0	0	0	0
ENSG00000223403	105.986	3.43853	0.918711	0.320912	5.29959	1.83347
ENSG00000223404	3.91935	0	0	1.62582	10.0684	0
ENSG00000223410	0	0	0	0	0	0
ENSG00000223430	0	4.29248	0	4.13963	3.41813	0
ENSG00000223432	0	0	0	0	0	0
ENSG00000223436	0	0	0	0	0	1.4928
ENSG00000223438	0	0	0	4.0363	0	1.15303
ENSG00000223440	0	0.413954	0.228575	0	0	0
ENSG00000223442	29.3719	14.5015	25.66	21.6134	20.3396	18.5226
ENSG00000223446	2.32014	0	0	0	0	0
ENSG00000223458	0	1.10989	0	0	0	0
ENSG00000223461	27.5148	12.8553	49.1817	14.1686	25.5919	18.2137
ENSG00000223462	20.7884	10.0596	9.72061	6.46757	11.682	4.6189
ENSG00000223466	0	0	0	1.21267	0	0
ENSG00000223469	0	0	0	0	0	0
ENSG00000223470	0	0	0	0	0	0
ENSG00000223475	0	0	0	0	0	0
ENSG00000223478	41.1099	41.9148	28.7496	36.6327	24.772	20.2077
ENSG00000223479	0	0	0	0	0	0
ENSG00000223482	78.1017	48.6753	84.5945	51.0043	37.3214	51.1747
ENSG00000223485	0	0	6.71932	0.977959	0	0
ENSG00000223486	2.9754	0.926768	3.94769	0	0.65892	0
ENSG00000223487	0	0	0	0	0	0
ENSG00000223492	23.1785	17.8138	41.1669	24.1785	53.6324	30.2937
ENSG00000223502	0.655811	3.38505	0	0	0	0
ENSG00000223504	0	0	0	0	0	0
ENSG00000223511	2.20656	7.47432	0	0.686493	0	2.7455
ENSG00000223516	0	0	0	0	4.0026	0
ENSG00000223517	0	0	0	0	0	0
ENSG00000223522	23.8149	26.8473	31.7467	19.7035	18.4879	27.3522
ENSG00000223523	0	0	0	0	0.444957	0
ENSG00000223525	19.1057	19.3366	5.60551	14.9184	49.5617	18.6448
ENSG00000223528	10.8977	7.49434	10.6709	9.01405	6.70538	9.74325
ENSG00000223530	0	0	0	0	0	2.24347
ENSG00000223534	17.0059	32.2714	39.0246	108.928	21.2007	79.6593
ENSG00000223536	0	0	0	0	0	0
ENSG00000223537	0	0	0	0	0	2.05553
ENSG00000223542	0	0	0	0	0	0.622197
ENSG00000223546	41.1063	28.7503	45.9608	24.4398	37.7507	30.4301
ENSG00000223548	6.87997	3.08798	0	4.09478	4.61058	2.55216
ENSG00000223552	3.36703	2.17241	6.74749	3.14259	0	6.58334
ENSG00000223554	0	0	0	0	2.38007	0
ENSG00000223561	0	0.720235	1.88905	1.62071	0.955878	0.925959
ENSG00000223563	0.76481	0	0	3.80709	0	0
ENSG00000223571	11.8751	9.30368	10.4256	2.63894	13.0739	6.63391
ENSG00000223576	5.59655	7.22181	0	0	3.19487	0
ENSG00000223581	0	0	0	0	0	0
ENSG00000223586	0	0.522399	0	0.251899	0	0
ENSG00000223587	0	0	0	0	0	0
ENSG00000223597	0	0	0	0	0	0
ENSG00000223598	0.97103	0	0	0	2.07873	0
ENSG00000223608	0	0	0	0	0	0
ENSG00000223617	0.413009	0	0	0	0	0
ENSG00000223623	0	0	0	0	0	0
ENSG00000223626	0	0	0	1.04594	0	1.79272
ENSG00000223631	0	0	0	0	0	0
ENSG00000223634	2.07202	0	4.42912	1.9339	0	0
ENSG00000223635	0.934336	0	1.99723	0.58137	5.40047	11.2933
ENSG00000223641	0	0	0	0	0	0
ENSG00000223642	12.9648	31.5747	16.5891	40.6763	22.7508	68.031
ENSG00000223643	0	0	0	0	0	1.40719
ENSG00000223646	0	0	0	0	0	0
ENSG00000223647	0	0	2.82383	0.821985	0	0
ENSG00000223649	0	0	0	0	0	0
ENSG00000223652	1.35341	1.39716	1.73582	1.01056	0	2.30945
ENSG00000223653	17.9457	30.8241	16.1995	31.0845	36.4443	26.7255
ENSG00000223660	22.2224	0	0	0	0	5.74546
ENSG00000223662	0	0	0	0.818071	0	0
ENSG00000223665	0	2.65878	1.65162	2.5641	1.98487	0
ENSG00000223669	0	8.6779	0	8.3689	0	3.71887
ENSG00000223675	0	0.820534	0.407771	0	0	0
ENSG00000223678	3.12857	5.0464	0	0	6.02772	0
ENSG00000223685	14.2366	9.63722	4.98884	14.8124	21.8834	17.9212
ENSG00000223692	20.6427	16.6484	2.75785	6.42224	12.4286	7.33844
ENSG00000223695	0	0	5.20747	0	4.86748	0.769817
ENSG00000223697	29.974	15.8558	24.6737	25.2537	44	35.2102
ENSG00000223701	2.28179	0	0.975504	0.567917	1.17233	1.94681
ENSG00000223704	2.51287	11.5555	5.17616	13.8164	8.68531	18.9709
ENSG00000223711	0	0.684488	0	2.97052	0	0
ENSG00000223714	2.31458	0	0	0	0	2.82113
ENSG00000223715	2.65477	0	0	0	0	1.13252
ENSG00000223716	0	0	0	0	0	0
ENSG00000223720	0	1.64183	1.81315	0	2.17899	0
ENSG00000223725	10.3214	1.94231	2.52803	4.0139	6.62861	2.44615
ENSG00000223726	0	0	0	0	0	0
ENSG00000223727	0.826017	0.532948	0	1.02794	1.32622	1.46824
ENSG00000223729	0	1.43853	0	0	1.43189	0
ENSG00000223732	0	0	0	0	0	2.49274
ENSG00000223734	1.92737	4.35241	1.02998	1.19927	0	1.37035
ENSG00000223742	0	4.24138	0	0	5.62906	0
ENSG00000223745	45.343	61.4885	96.8014	65.2576	21.9329	56.5203
ENSG00000223749	8.22695	30.1497	13.1894	26.619	3.17012	13.5704
ENSG00000223751	0	0	0	0	0	0
ENSG00000223754	1.52539	7.21738	2.71722	3.16381	0	1.44606
ENSG00000223761	0	0	0	0	0	0
ENSG00000223764	0.398983	12.6996	0.710718	19.0331	0	12.5763
ENSG00000223765	0	0	0	0	0	0
ENSG00000223768	1.41328	18.9852	0.774616	1.2176	1.58255	0.927539
ENSG00000223770	0.208296	2.95665	0.333938	4.27705	1.20395	6.2201
ENSG00000223774	6.58352	23.3624	24.1877	27.651	38.5813	22.8192
ENSG00000223776	10.6118	3.17885	10.1266	4.7164	9.97931	4.04193
ENSG00000223783	0.58557	0	0	0	0	0
ENSG00000223784	0	4.58539	1.14654	1.08467	0	0.190678
ENSG00000223786	0	0	0	0	0	0
ENSG00000223791	0.35488	0	0	0	0	0
ENSG00000223795	0	0	0	0	3.94034	2.61738
ENSG00000223797	18.5556	28.9978	18.2376	20.1907	8.62324	19.8889
ENSG00000223799	82.1597	93.7064	40.9259	120.596	52.8444	95.5084
ENSG00000223800	0	0	0	0	0	0
ENSG00000223806	0	0	0	0	0	0
ENSG00000223808	0	0	0	0	0	0
ENSG00000223809	0	0	0	0	0	0
ENSG00000223811	0	0	0	0	0	0
ENSG00000223812	0	0	0	0	0	0
ENSG00000223813	13.8048	13.1129	2.04924	12.8846	11.3285	12.5416
ENSG00000223814	8.8188	42.0178	25.3763	27.8586	5.22797	42.444
ENSG00000223815	4.51384	0	4.0203	0	0	0
ENSG00000223817	0	0	0	2.7269	0	0
ENSG00000223821	14.1779	6.74036	7.17787	12.0721	8.62615	12.7332
ENSG00000223823	6.13547	5.27816	0	5.72649	9.41304	2.9082
ENSG00000223826	1.41588	0	3.78321	0	0	0
ENSG00000223829	0.5389	0	0	0	0	0
ENSG00000223831	0	0	0	0	4.27266	0
ENSG00000223834	0	2.40263	0.568574	1.32405	1.02494	0
ENSG00000223837	43.2932	20.0274	38.4141	39.645	50.3618	49.947
ENSG00000223838	0	0	0	0	0	0
ENSG00000223839	2.99688	8.18405	0.0372447	4.64017	0.850433	2.77495
ENSG00000223842	59.829	23.0978	15.2	24.7165	29.92	35.5647
ENSG00000223843	0.935567	1.07312	0.666619	0	0	1.62601
ENSG00000223850	0	0	0	0	0	0
ENSG00000223855	3.30749	1.93076	0.505003	3.52802	3.03449	0.559907
ENSG00000223859	0	2.51341	6.24529	1.81793	0	1.38486
ENSG00000223863	0	0	0	0	0	0
ENSG00000223870	0	0	0	0	0	0
ENSG00000223872	0	0	0	0	0	0
ENSG00000223874	0	1.81311	0	0	0	2.997
ENSG00000223880	0	0	0	0	0	0
ENSG00000223881	0	0	0	0	0	0
ENSG00000223882	6.47561	1.5193	5.03352	4.3956	0	5.02269
ENSG00000223883	0	0	0	0	0.565599	0
ENSG00000223884	5.91884	3.59421	2.97695	4.9827	1.78881	6.18863
ENSG00000223891	26.0182	13.2014	35.6376	25.7771	42.3415	33.9445
ENSG00000223901	143.61	26.7925	7.92543	20.9168	109.85	33.3909
ENSG00000223906	0	0	0	0	0	0
ENSG00000223910	0	0.737632	0	0.889207	0	0
ENSG00000223911	13.4027	9.51222	13.6085	15.0112	12.9113	14.2939
ENSG00000223914	0	0	0	0	0	0
ENSG00000223923	0	2.50899	3.11715	3.62947	4.37045	0
ENSG00000223930	0	0.639864	0.529975	0	0	0
ENSG00000223935	8.32916	3.58266	7.25361	8.44578	7.13224	11.4053
ENSG00000223941	0	0	0	0	0	0
ENSG00000223942	0	0	0	0	0	0
ENSG00000223944	0	0	0	0	0	0
ENSG00000223946	13.7191	22.1289	21.9943	34.1456	11.0134	14.6313
ENSG00000223947	22.1035	25.1489	34.8858	3.64787	8.95481	6.64671
ENSG00000223949	0.856958	1.40741	1.24897	1.84204	3.30215	1.55093
ENSG00000223956	44.5807	234.031	8.66319	99.6095	109.968	167.848
ENSG00000223960	40.645	21.1041	15.6359	34.0069	12.8521	27.4756
ENSG00000223966	0	0	0	0	0	0
ENSG00000223969	3.13746	8.67555	4.79042	7.80886	4.02989	13.3843
ENSG00000223975	0	7.63449	0	0	0	0
ENSG00000223979	0	1.26339	2.61605	3.04601	0	0
ENSG00000223985	0	0	0	0	0	0
ENSG00000223989	44.9308	60.4997	74.4685	61.5868	31.7829	48.1499
ENSG00000223991	2.00155	122.76	0	7.76557	0	33.3171
ENSG00000223993	0	0	0	0	0	0
ENSG00000223999	0	3.94985	0	7.6184	0	0
ENSG00000224000	0	0	0	0	0	0
ENSG00000224008	0	0	0	0	0	0
ENSG00000224015	8.69595	10.2862	50.3434	28.8579	57.7089	4.12185
ENSG00000224017	0.226308	4.08841	0	3.09794	0	1.28723
ENSG00000224018	0	0	0	0	0	0
ENSG00000224020	55.8866	15.6073	327.63	20.2417	53.0339	33.2114
ENSG00000224023	2.25253	7.78575	18.2282	2.80318	1.85995	3.77506
ENSG00000224027	0	0	0	0	0	0
ENSG00000224028	0	0	0	0	0	0
ENSG00000224029	3.88868	16.169	4.618	16.131	4.9948	21.5043
ENSG00000224031	26.7683	19.7383	17.9833	15.2284	17.6824	10.8755
ENSG00000224032	90.0781	29.4056	129.72	28.3585	36.6932	31.2301
ENSG00000224034	5.58576	5.1485	0	1.98607	3.5873	3.97145
ENSG00000224038	0	0	0	0	0	0
ENSG00000224043	14.5633	101.01	33.7246	38.5123	27.669	40.555
ENSG00000224046	7.46206	5.61696	19.2739	10.8339	1.99679	3.537
ENSG00000224048	0	0	0	0	0	0
ENSG00000224049	2.12928	0	0	0	0	0
ENSG00000224050	0	1.81157	1.00031	9.90004	24.6438	16.6359
ENSG00000224057	134.801	69.9601	5.78402	41.0202	65.4664	51.7692
ENSG00000224063	200.883	285.844	41.0961	281.267	234.654	265.383
ENSG00000224066	8.95227	10.7644	13.6998	12.4067	6.79469	9.54754
ENSG00000224074	0.240362	2.99826	0.599428	1.4956	2.77859	1.36717
ENSG00000224075	0	0	0	0	0	0
ENSG00000224076	0	0	0	0	0	0
ENSG00000224077	0	1.47526	0	0	0	0
ENSG00000224078	6.8253	43.6587	35.5819	40.058	47.2224	49.8688
ENSG00000224079	10.4847	10.2496	5.77276	5.93078	14.6913	7.22866
ENSG00000224086	19.147	10.2877	10.4153	10.0484	13.3506	7.91395
ENSG00000224087	0	0	0	0	20.2471	0
ENSG00000224090	1.24742	4.29248	9.33267	0	0	0.788367
ENSG00000224091	0	0	0	0	0	0
ENSG00000224093	73.3337	60.8988	41.9831	48.5316	47.0058	34.559
ENSG00000224095	1.2636	0	0	0	0	0
ENSG00000224099	0	0	0.895116	0	0	2.77881
ENSG00000224100	2.5272	2.44583	4.72684	0	0	0.898413
ENSG00000224101	7.32074	39.1364	6.14771	27.331	39.6273	44.6144
ENSG00000224116	0.152905	0.59193	2.94164	0.761136	0.196399	1.15963
ENSG00000224122	7.97128	24.3128	0	15.3308	0	39.1576
ENSG00000224127	0	0	0	0	0	0
ENSG00000224128	0	0	0	0	0	0
ENSG00000224132	0	0	0	0	0	0
ENSG00000224137	4.48937	6.51724	13.7949	17.4588	0	7.18183
ENSG00000224138	31.5692	33.8324	21.1596	43.2816	52.9197	34.9998
ENSG00000224141	0	0	0	0	12.4389	0
ENSG00000224142	2.46075	4.44551	1.57802	3.67476	0	0
ENSG00000224149	0	0	0	0	0	0
ENSG00000224152	24.3941	34.5783	54.7121	41.3963	35.6055	36.5277
ENSG00000224153	0.680375	0	0	0	0	0.870739
ENSG00000224157	8.69068	10.3518	5.71603	2.49581	12.88	5.70373
ENSG00000224164	1.48705	0	0	0	0	6.34373
ENSG00000224165	4.00635	5.80028	6.42295	4.13451	2.07093	1.87584
ENSG00000224167	0.470351	1.21389	0	3.51199	4.83313	1.33767
ENSG00000224173	0	0	0.585496	0	0	0
ENSG00000224174	0	0	0	0	0	0
ENSG00000224177	0.836655	1.94332	0.536527	0.208236	1.28957	3.09326
ENSG00000224184	0	0	0	0	1.00643	0.405167
ENSG00000224186	107.117	17.037	37.7183	20.047	18.5581	20.0731
ENSG00000224187	0.644708	1.03992	0	0	2.6913	0
ENSG00000224189	18.9107	0.209164	580.594	4.63947	21.722	0
ENSG00000224190	0	0	0	0	0	0
ENSG00000224192	0	0	2.75785	0	0	0
ENSG00000224194	0	0	0	0	0	0
ENSG00000224195	26.0585	20.8161	53.713	30.8845	35.0646	30.8792
ENSG00000224204	0	0	0	0	0.37212	0
ENSG00000224209	0	0	0.328608	0	0	0
ENSG00000224215	0	0	0	0	0	0
ENSG00000224216	14.1176	13.4561	11.831	10.3816	22.4606	11.8626
ENSG00000224218	0	0	0	0	0	0
ENSG00000224220	9.33659	12.9086	10.6917	10.789	27.4111	13.2766
ENSG00000224222	2.10761	0	0	0	0	4.4955
ENSG00000224223	0	0	0	0	0	0
ENSG00000224228	0	0.881871	0	0.85047	0	0
ENSG00000224231	3.99416	5.15408	4.26893	1.24264	10.9018	2.83983
ENSG00000224238	6.43331	15.7384	8.7381	11.6754	5.85313	11.8163
ENSG00000224239	1.11105	3.58427	0	2.76531	0	2.36986
ENSG00000224243	0	0	0	0	0	0
ENSG00000224247	1.20391	0	0	0	0	0
ENSG00000224250	1.8468	0	0	0	0	0
ENSG00000224251	22.3397	99.7869	4.28554	35.6421	12.5077	32.5815
ENSG00000224257	0	0	0	0	0	2.5221
ENSG00000224259	3.50043	0.677546	4.11536	7.62323	2.47286	0.248879
ENSG00000224260	0	0	0	0	0	0
ENSG00000224265	0	0	0	0	0	0
ENSG00000224267	1.59133	0	0	0	0	0
ENSG00000224269	0	0	0	0	0	0
ENSG00000224271	0	0	0	0	89.7484	0
ENSG00000224272	1.71793	7.44221	0.524604	8.39886	3.62511	10.644
ENSG00000224276	1.37704	0	0	1.71366	3.53746	1.95814
ENSG00000224277	4.51138	0	2.89304	1.12284	0	0
ENSG00000224281	76.7485	60.3286	246.951	68.2695	74.1658	54.1835
ENSG00000224286	0.542429	0	0	0	1.62568	0
ENSG00000224292	11.4159	9.82078	1.3557	14.2066	5.97387	22.2457
ENSG00000224294	0.123921	0	0	0	0	0
ENSG00000224301	0.546725	0	0	0	0	0
ENSG00000224307	6.6301	9.77773	703.053	20.6272	3.64972	15.4888
ENSG00000224308	0	0	0	0	0	0
ENSG00000224310	0.284929	0	0	0	0	0
ENSG00000224311	0	0	0	0	0	0
ENSG00000224318	0	0	0	0	4.41782	0
ENSG00000224322	0	0	0	0	0	0
ENSG00000224326	0	0	0	0	0	0
ENSG00000224328	145.905	79.1725	123.554	59.5928	102.353	57.9866
ENSG00000224329	0	0	0	0	1.16527	0
ENSG00000224330	0	0	0	0	0	0
ENSG00000224342	2.49184	0.643098	0	4.34139	1.28026	0.708676
ENSG00000224347	0	0	0	0	0	0
ENSG00000224349	0	3.06254	0	0.984498	3.0484	3.37484
ENSG00000224356	7.29168	5.19467	4.30255	4.72613	3.99996	7.66852
ENSG00000224358	23.7571	6.62839	13.1761	2.71676	10.0616	4.93041
ENSG00000224359	4.64027	41.9148	0	28.8731	1.98673	75.8819
ENSG00000224361	6.61875	0	49.0132	7.06006	3.64347	7.39499
ENSG00000224363	4.63471	9.25577	1.65118	9.61282	6.66173	10.0427
ENSG00000224371	4.64809	3.59875	0	0	5.97021	1.32191
ENSG00000224374	0	0	0	0	0	0
ENSG00000224375	0	0	0	0	0	0
ENSG00000224376	1.03731	1.33854	4.80422	3.2272	1.33236	2.21256
ENSG00000224382	0	0	0	0	0	0
ENSG00000224384	3.44403	0	0	1.42865	0	0
ENSG00000224387	0	0	0	1.51028	0	1.72574
ENSG00000224388	0	0	0	0	0	0
ENSG00000224391	0	0	0	0	0	1.32637
ENSG00000224394	17.8734	15.7805	15.0813	16.9746	20.5408	20.7339
ENSG00000224397	11.152	14.0999	4.81583	15.4202	1.01282	5.60638
ENSG00000224400	0	0	0	0	0	0
ENSG00000224404	0	0	0	0	0	0
ENSG00000224405	0.960335	0	0	0	0	0
ENSG00000224406	0	0	0	0	0	0
ENSG00000224407	1064.41	345.197	323.767	213.366	429.072	222.439
ENSG00000224409	0	0	0	0	0	0
ENSG00000224413	0	0	0.268508	0	0	0.53586
ENSG00000224417	3.56044	9.04961	3.22881	7.51896	2.63305	9.20531
ENSG00000224418	12.3142	9.47839	6.6961	4.03274	6.65973	2.15043
ENSG00000224424	20.7231	10.1871	17.9299	12.719	12.2224	10.0231
ENSG00000224429	4.01001	5.55783	1.90483	6.09923	1.52611	5.91339
ENSG00000224445	0	0	0	0	1.01808	0.7514
ENSG00000224459	7.34528	23.4172	2.309	9.14088	2.77489	15.9746
ENSG00000224467	0	2.83321	0	0.683081	2.11509	3.12212
ENSG00000224468	28.2437	8.9255	32.6509	12.9115	37.0178	13.9338
ENSG00000224477	8.44331	9.80576	0	14.7103	29.2814	39.6208
ENSG00000224478	1.52259	0.218306	0	0	0	0
ENSG00000224481	2.56	0.82586	1.36806	0	2.13732	0
ENSG00000224490	10.1458	5.71044	5.4219	5.50711	12.0613	7.67409
ENSG00000224500	1.32103	3.40934	0	4.93191	1.6968	3.757
ENSG00000224504	0	0	0	0	0	0
ENSG00000224505	140.825	202.197	170.44	136.745	72.8623	116.203
ENSG00000224506	0	2.8858	0	3.4788	0	1.06002
ENSG00000224509	0.430057	0	0.919284	0	1.10477	0.611537
ENSG00000224511	9.20935	12.478	1.77172	4.92807	0.946313	8.51215
ENSG00000224513	0	1.63805	0	0	0	0
ENSG00000224514	0	0	0	0	0	0
ENSG00000224515	0	0	0	0	0	0
ENSG00000224516	0	0	0	0	0	0
ENSG00000224517	0	17.1343	0	15.9544	0	26.6946
ENSG00000224521	0	0	0	0	0	0
ENSG00000224525	0	0	1.54094	0	0	0
ENSG00000224532	0	0	0	0	0	0
ENSG00000224533	12.8695	11.0069	13.5949	9.4976	18.2601	9.36298
ENSG00000224535	0	0	0	1.91415	0	0
ENSG00000224536	3.46031	31.7264	32.1173	37.396	3.97673	31.854
ENSG00000224541	10.5649	11.8153	9.03337	10.5181	9.95137	14.0217
ENSG00000224549	12.971	64.5601	0	76.097	28.5609	82.5616
ENSG00000224559	0.392628	0.40532	0.251783	1.27038	114.882	2.56825
ENSG00000224563	15.6492	28.1271	28.6727	26.43	25.8435	29.4058
ENSG00000224565	1.10439	0	0	0	0.945682	0
ENSG00000224568	0	0	0	0	0	0
ENSG00000224574	42.0147	15.4903	150.753	14.3162	23.1281	13.5136
ENSG00000224577	0	0	40.9495	1.47463	3.04404	0
ENSG00000224582	0	0	0	0	0.248747	0
ENSG00000224583	0	0	0	0	0	0
ENSG00000224592	0	1.04174	1.72567	1.00465	0	0
ENSG00000224595	1.42318	9.18237	0	10.0361	1.82799	10.7933
ENSG00000224596	4.67748	2.97769	8.79871	6.44182	10.9746	4.34554
ENSG00000224605	0	0	0	0	0	0
ENSG00000224606	1.89975	2.45144	5.4145	3.94025	0	3.6019
ENSG00000224609	0.841207	1.62825	1.73393	1.79459	0.540243	0.341769
ENSG00000224610	0	0	0	0	0	0
ENSG00000224612	0	0	0	0	0	0
ENSG00000224613	0	0	0	1.07708	0	0
ENSG00000224614	5.53246	10.5387	5.20913	9.3438	21.6568	5.99399
ENSG00000224616	1.88971	4.49195	5.52762	7.92138	1.66073	7.49573
ENSG00000224621	5.58283	1.96476	3.25467	3.15799	0	4.33022
ENSG00000224626	9.7534	18.3947	11.2263	14.005	2.89101	17.0699
ENSG00000224635	11.0218	2.48895	0.883503	1.71452	9.37896	4.31005
ENSG00000224638	1.81642	2.34392	0	1.50697	0	0
ENSG00000224643	2.77484	8.35488	1.97715	2.87764	5.34619	0
ENSG00000224644	13.7134	50.728	0	22.7543	24.6597	41.6007
ENSG00000224645	105.657	47.7689	125.29	72.9408	34.6706	97.6033
ENSG00000224648	1.1362	8.79694	0	2.8279	0	0
ENSG00000224649	7.59898	21.7906	0	16.8117	4.33799	9.60505
ENSG00000224652	0.302075	43.6575	27.1199	47.1778	0	24.699
ENSG00000224655	0	0	0	0	0.244404	0
ENSG00000224658	0	6.87349	0	5.52395	1.14029	0
ENSG00000224660	49.2186	154.554	63.2078	142.218	79.9821	141.004
ENSG00000224661	0	7.5052	0	4.25762	0	0
ENSG00000224666	0	0	0	0	0	0
ENSG00000224671	0	0	0	1.94668	0	0
ENSG00000224675	0.350673	0	0	0	0	0
ENSG00000224687	8.90633	3.02441	15.9068	5.83344	10.085	4.16603
ENSG00000224691	0	0	5.01569	5.84005	0	3.3366
ENSG00000224698	0	0	0	0	0	0.791226
ENSG00000224699	8.54859	8.9773	18.8221	8.68958	8.37529	8.35954
ENSG00000224700	0	0	1.53426	0	0	0
ENSG00000224702	0	0	0	0	0	0
ENSG00000224707	31.0608	14.251	6.63953	8.58974	18.6181	4.90758
ENSG00000224711	0	0	0	0	0	0
ENSG00000224713	9.98194	13.1548	9.30669	10.3077	2.86432	8.60714
ENSG00000224714	0	1.10817	0	1.33589	0	1.67911
ENSG00000224715	0	0	0	1.18099	0	0.269895
ENSG00000224717	0	0	0	0	0	0
ENSG00000224718	0.457871	1.37862	1.14186	0.5698	0.784147	0.651089
ENSG00000224721	62.0226	50.6608	15.0347	73.2058	37.6148	70.7383
ENSG00000224729	25.1089	19.3614	11.6727	20.5773	36.3152	18.7232
ENSG00000224730	5.48206	12.2189	0	15.5049	0	11.3388
ENSG00000224731	0	0	0	2.8279	0	0
ENSG00000224733	50.7937	34.3946	20.9627	28.1631	36.1736	35.0414
ENSG00000224738	8.6667	6.3906	21.834	5.90625	12.4571	2.64085
ENSG00000224739	2.32993	3.00655	138.207	0	0	0
ENSG00000224743	0	0.164183	0.226644	0.105558	0	0
ENSG00000224745	19.3655	17.1355	5.91363	24.788	14.2137	27.5375
ENSG00000224746	10.6455	4.87442	2.20216	6.83761	3.08758	11.2313
ENSG00000224750	0	0	0.258473	0.300954	0	0
ENSG00000224758	0	1.17972	0	0	0	0
ENSG00000224764	11.3387	10.242	13.3306	16.9326	12.3793	20.1543
ENSG00000224765	0	0	0	0	0	0
ENSG00000224771	0	0	0	0	1.39894	0
ENSG00000224788	0	0	0	0	0	0
ENSG00000224789	78.2673	78.6905	50.2936	58.5596	78.3271	65.5482
ENSG00000224790	10.844	4.40235	11.8505	4.09396	2.97351	4.67801
ENSG00000224794	0	0.592477	3.27151	0.57138	0	0
ENSG00000224795	0	0	0	0	0	0
ENSG00000224799	22.2935	12.1709	3.2075	7.46934	0	1.21928
ENSG00000224805	2.50617	10.7799	3.57144	4.15842	16.6317	16.0369
ENSG00000224808	3.87051	0	3.44731	3.21112	1.65715	1.83461
ENSG00000224810	0.560488	5.78605	0.838664	6.41702	5.47136	9.4047
ENSG00000224812	0.585659	0.755737	0.536527	2.39472	0.429855	0.71383
ENSG00000224814	9.16157	296.091	0	104.683	577.144	135.014
ENSG00000224817	0.948785	0	0	2.36144	0	0
ENSG00000224818	0	24.427	17.2712	8.04391	7.70936	4.59573
ENSG00000224819	0	0	0	0	0	0
ENSG00000224821	3.08386	4.4476	9.88804	4.51498	3.02904	5.675
ENSG00000224822	110.344	103.389	5.04715	66.6023	58.0268	70.7319
ENSG00000224825	0	0	0	0	0	0
ENSG00000224832	1.46647	0	0	0	1.54113	0
ENSG00000224842	0	0	0	0	0	0
ENSG00000224843	3.53587	6.70663	5.00847	9.5957	3.06424	7.69342
ENSG00000224844	7.8413	2.1302	0	2.05435	3.18054	1.17371
ENSG00000224846	20.4895	15.2029	1.09495	1.27492	4.60559	9.46918
ENSG00000224848	0	3.35319	10.4149	9.70136	2.50328	1.84756
ENSG00000224851	0	0	0	0.34359	0	0
ENSG00000224853	0	0	0	0	0.211678	0
ENSG00000224854	8.72236	1.2987	0	0	0	0.954086
ENSG00000224855	6.11078	8.60224	8.90614	19.3572	19.2657	17.379
ENSG00000224857	8.42547	10.8723	0	3.22619	2.4974	7.37289
ENSG00000224863	0	0	1.26648	1.96618	0.50734	0.561669
ENSG00000224865	0	0	0	0	0	0
ENSG00000224870	28.7578	54.7466	24.7759	32.7941	54.7746	33.8963
ENSG00000224875	34.4027	22.5729	57.3353	35.9191	168.141	119.813
ENSG00000224876	0	0	0	0	0	0
ENSG00000224879	0	0	0	0	0	0
ENSG00000224883	0	0	0	0	0	0.762343
ENSG00000224884	0	2.54029	2.10403	0	0	0
ENSG00000224885	16.9196	11.4127	18.9055	16.2703	9.87829	15.3106
ENSG00000224888	3.10803	6.01592	3.50639	6.01658	3.99209	5.64725
ENSG00000224893	0	0	0	0	0	0
ENSG00000224897	2.23365	1.13032	0.983009	1.36259	0.393784	1.68153
ENSG00000224899	2.3008	0	0.491817	2.86325	1.1821	0
ENSG00000224901	8.94239	4.32724	15.5311	9.73736	8.61451	17.4845
ENSG00000224903	4.09307	11.5238	5.17004	8.79812	1.43382	0
ENSG00000224905	4.6796	6.03858	6.33527	2.1353	0.400713	3.99261
ENSG00000224910	0	0	0	0	0	0
ENSG00000224914	67.4491	36.0937	84.927	33.5541	25.3539	26.9939
ENSG00000224918	0	0	0	0	0	0
ENSG00000224919	132.149	74.6048	12.6107	17.62	7.57758	18.4559
ENSG00000224922	0	0	0	0	0	0
ENSG00000224924	0	0	0	0	0	0
ENSG00000224932	0	0	0	0	0	0
ENSG00000224933	0	0	0	0	0	0
ENSG00000224934	18.812	21.4861	21.3895	13.4487	9.87085	11.0986
ENSG00000224935	0	0	0	0	0	0
ENSG00000224939	0	0	1.55995	0	0.468675	1.21068
ENSG00000224943	30.1019	19.6307	0	8.05603	85.2278	12.8874
ENSG00000224944	0	0	0	0	0	0
ENSG00000224945	19.6832	13.7293	1.99001	4.30315	0	10.2123
ENSG00000224950	6.11682	16.7149	184.207	15.5227	12.7864	10.233
ENSG00000224957	0.813044	8.48068	1.30347	1.85496	1.91457	1.0598
ENSG00000224958	0	1.76958	0	1.70657	0	1.95003
ENSG00000224959	73.3332	15.3672	18.7571	11.31	37.4355	33.4228
ENSG00000224961	0	2.44025	0	3.92226	0	5.37817
ENSG00000224965	0	2.38152	1.97253	6.43082	0.94821	1.04975
ENSG00000224968	0.562314	5.07929	4.20699	4.89843	1.44452	5.59724
ENSG00000224969	0	0	0	0	0	0
ENSG00000224970	0	0	0	0	0	0
ENSG00000224972	8.48759	10.9524	14.4076	16.1543	14.7496	12.7792
ENSG00000224973	12.1599	20.4351	13.9032	15.6017	33.538	19.436
ENSG00000224975	76.8395	22.6207	31.5387	47.9935	76.9305	59.4103
ENSG00000224977	0	3.19053	0	0	0	3.51588
ENSG00000224984	0	0	0	0	0	4.01986
ENSG00000224985	99.0741	32.9015	116.012	29.9168	114.156	25.8975
ENSG00000224989	0	0	0	0	0	0
ENSG00000224992	4.60612	1.0489	3.47505	3.03465	0	2.697
ENSG00000224995	11.681	0	0	2.643	0	0
ENSG00000225000	1.51701	5.87268	0	10.0686	1.29901	5.75248
ENSG00000225002	1.21095	1.56261	0	0	2.3331	1.72196
ENSG00000225006	0	0	0	0	1.90151	0
ENSG00000225007	0	0	0	0	0	0
ENSG00000225012	0	1.5193	3.14595	2.9304	0	0
ENSG00000225028	5.50053	22.0824	17.8001	16.7326	3.53257	13.9053
ENSG00000225030	0	0	0	0	0	0
ENSG00000225032	18.5539	106.708	36.64	107.343	37.2465	77.2284
ENSG00000225037	24.8341	16.9655	6.24529	9.08967	35.6507	25.966
ENSG00000225039	1.84886	13.5194	1.97605	6.13553	0	0
ENSG00000225044	0	0	0	0	0	0
ENSG00000225050	0	0	0	0	0	0
ENSG00000225056	0	0	0	0	0	0
ENSG00000225057	5.18124	4.67097	5.15839	3.53306	6.01687	7.46861
ENSG00000225058	12.2853	5.00622	8.29293	0	12.4578	2.75836
ENSG00000225062	12.8251	8.73451	17.515	5.3201	12.3549	6.58566
ENSG00000225063	2.01236	0	0	0	0	0
ENSG00000225064	1.05582	0	0	2.62784	0	0
ENSG00000225075	43.044	32.533	23.6598	30.6093	27.6438	29.7297
ENSG00000225076	3.8214	0	5.6159	2.97223	4.90838	5.434
ENSG00000225077	1.87343	3.9284	0.500577	3.05996	0.751973	0
ENSG00000225083	10.3214	44.4967	22.0628	36.1981	76.229	27.6859
ENSG00000225084	7.38849	17.0611	14.9623	29.0357	20.9782	21.0127
ENSG00000225085	0	0	0	0	0	0
ENSG00000225087	0	0	0	0	0	0
ENSG00000225092	99.6648	65.8983	31.6922	84.8724	107.278	88.3131
ENSG00000225096	1.38089	2.88249	1.51929	1.92062	0.521669	1.50158
ENSG00000225102	2.0007	0	0	0	3.85468	0
ENSG00000225105	0	0	0	0	0	0
ENSG00000225106	0	0	0	0	0	0
ENSG00000225107	0	0	0	0	0	0
ENSG00000225111	17.0721	29.6264	38.3806	24.9084	52.1738	51.9011
ENSG00000225112	3.70102	4.77582	1.58225	5.52691	6.65527	15.7885
ENSG00000225113	23.6257	23.9111	35.1533	15.5653	14.2804	25.6907
ENSG00000225126	0	0	0	0	0	0
ENSG00000225127	0	0	0	0	0	0
ENSG00000225128	0	0	0	0	0	0
ENSG00000225129	0	0	0	0	0	0
ENSG00000225138	43.3847	20.4556	431.248	16.2131	40.8048	19.9862
ENSG00000225140	26.3266	25.5865	35.6174	24.0534	31.8889	32.4605
ENSG00000225144	0	3.44228	0	4.97956	0	1.89665
ENSG00000225146	19.6106	9.32311	7.72198	5.78001	9.28006	2.20153
ENSG00000225148	0	0	0	0	0	0
ENSG00000225152	19.9108	3.42573	0	0	0	0
ENSG00000225156	0.205658	0	3.2971	0	0.924549	0
ENSG00000225163	13.016	1.01793	6.32336	0	1.01323	0
ENSG00000225166	0	0	0	0	0	0
ENSG00000225172	0	0	0	0	0	0
ENSG00000225173	0	0	0	0	0	0
ENSG00000225174	0	0	0	0	0	0
ENSG00000225177	12.2207	35.6276	20.0758	23.3754	7.5577	20.9176
ENSG00000225179	0	0	0	0	0	1.58309
ENSG00000225181	6.91571	2.0594	2.84287	8.60629	10.2494	3.78234
ENSG00000225187	9.95231	19.4709	16.8133	14.3828	9.07195	10.4999
ENSG00000225194	4.5551	3.45328	6.02473	3.96804	1.31643	4.77702
ENSG00000225195	9.82549	5.07155	3.15043	11.0047	3.78609	6.98588
ENSG00000225203	4.54747	5.02978	3.47165	4.04223	5.00655	1.84756
ENSG00000225205	15.1193	10.483	17.6065	14.4625	25.6517	22.4622
ENSG00000225206	0.808425	0	0.987474	0	0	0
ENSG00000225208	0	0	0	0	0	0
ENSG00000225209	0	0	0	0	0	0
ENSG00000225213	10.6953	11.2454	6.77395	10.845	8.14073	6.19609
ENSG00000225214	4.35655	7.72986	0	2.71077	2.79788	0
ENSG00000225216	5.27356	13.3905	3.81817	13.1254	4.80707	10.4018
ENSG00000225218	47.4692	18.7514	8.28323	10.8502	36.0852	8.2654
ENSG00000225226	0	0	0	0	0	0
ENSG00000225230	5.43734	6.62658	5.16569	5.63878	3.87999	5.58412
ENSG00000225231	6.20441	0	0.904259	8.774	0	0
ENSG00000225233	2.50997	0	6.70659	0	2.41794	0
ENSG00000225234	27.0623	12.1636	33.7989	15.1361	16.7942	9.08011
ENSG00000225235	0	0	0	0	0	0
ENSG00000225243	4.16226	4.02825	2.59501	4.7481	0	1.9729
ENSG00000225249	0	0	0	0	0	0
ENSG00000225255	0.645839	0	0	0	4.14773	0
ENSG00000225258	0	0	0	0	0	0
ENSG00000225263	0	0	0	6.45576	0	4.09819
ENSG00000225265	15.8041	16.4624	17.5019	16.5871	8.31548	17.5996
ENSG00000225269	0	3.47088	0	2.95349	0	2.24989
ENSG00000225279	0	1.10473	0	1.59809	0	3.04346
ENSG00000225280	0	0	0	0	0	0
ENSG00000225284	9.03588	6.47775	3.21916	3.12354	7.7374	2.85532
ENSG00000225285	7.13762	5.02387	24.6197	12.5162	29.5873	3.22943
ENSG00000225292	0	3.39311	1.87359	5.4538	0	3.73911
ENSG00000225298	0	1.74931	0	1.68702	2.32164	0
ENSG00000225299	0	49.3848	0	23.8131	44.2411	93.2927
ENSG00000225300	25.0741	28.7202	15.9589	25.2433	23.7024	19.43
ENSG00000225303	7.40205	27.6997	10.2846	27.6346	29.4733	37.8923
ENSG00000225311	54.558	7.1113	10.013	10.2871	6.37061	17.2402
ENSG00000225313	1.51286	27.5082	12.6415	21.9076	22.3466	29.5311
ENSG00000225315	0	0	0.649978	0	0	0
ENSG00000225316	0	0	0	0.308984	0	1.05919
ENSG00000225321	0	0	0	0	0	0
ENSG00000225325	0	0	0	0	0	0
ENSG00000225328	0	0	0	0	0	0
ENSG00000225329	0.581255	1.65012	782.517	10.2715	12.0948	1.9837
ENSG00000225330	0	3.2746	0	0	0	0
ENSG00000225331	0	0	0	2.77408	0	3.62267
ENSG00000225334	0	0	0	4.06134	0	0
ENSG00000225335	27.3008	23.5923	48.1914	29.8239	36.4944	27.4034
ENSG00000225337	2.65477	0	0	0	0	0
ENSG00000225339	242.813	169.991	281.666	154.319	143.53	130.19
ENSG00000225341	0	0	0	0	0	0
ENSG00000225342	2.54299	10.6258	0.647127	5.4251	5.13281	14.1201
ENSG00000225350	0	11.4928	0	3.69451	0	7.59884
ENSG00000225359	0	0	0	2.58338	0	0
ENSG00000225361	21.7932	9.02566	7.94776	8.7959	3.30989	9.94603
ENSG00000225365	0	21.7758	0	12.8336	4.21463	9.99847
ENSG00000225376	0	3.3142	2.05877	1.19857	4.12361	1.82608
ENSG00000225377	22.0877	12.2152	54.9711	26.3092	8.10584	16.153
ENSG00000225378	0	0	0	0	0	0
ENSG00000225383	2.68055	0	17.1897	0	4.73415	0
ENSG00000225386	0	0	0	0	0	0
ENSG00000225387	0	0	0	0	0	0
ENSG00000225391	0	0	0	0	0	0
ENSG00000225393	15.4774	17.395	0	0	32.0643	0
ENSG00000225399	1.79283	2.31348	4.07186	1.95221	2.01495	7.64818
ENSG00000225407	8.74305	16.6262	11.3118	24.6239	11.821	25.5194
ENSG00000225408	8.6439	18.3715	2.71722	13.288	16.9805	27.4752
ENSG00000225411	0.342127	0.551853	0	0.425762	0.659165	1.33788
ENSG00000225413	0	0	0	2.88126	0	0
ENSG00000225417	0	0	0	0	0	6.96111
ENSG00000225420	107.783	45.4777	144.927	49.1685	73.8899	64.7228
ENSG00000225421	0	0	0	0	0	0
ENSG00000225424	0	0	0	0	0	0
ENSG00000225427	0	0	0	0	0	0
ENSG00000225431	7.93291	3.41222	450.864	5.42001	1.59834	4.20255
ENSG00000225434	7.52581	16.089	3.60159	10.0645	4.32828	9.90301
ENSG00000225437	0.358102	0.462096	0	0.891283	1.1499	1.27304
ENSG00000225439	4.81738	4.66228	18.9862	11.8027	3.86729	5.77992
ENSG00000225442	20.094	22.2252	30.6804	35.0734	25.4744	31.5421
ENSG00000225444	0	0	0	0	0	0
ENSG00000225446	0.89236	2.99392	2.6705	0.666302	0	1.01514
ENSG00000225450	9.38727	23.5142	20.0661	26.8	14.8945	10.993
ENSG00000225457	0	0	0	0	0	0
ENSG00000225458	0	0	0	0	0	0
ENSG00000225465	0.924577	0.17044	0.89407	1.86287	1.01792	1.50256
ENSG00000225470	30.1207	22.1014	14.0395	17.0312	32.0442	37.0974
ENSG00000225472	0.785853	1.35209	1.39986	2.93388	0.672924	2.23495
ENSG00000225473	0.263954	0.340608	0	0	0	0.750682
ENSG00000225479	50.964	11.4928	23.2687	21.5513	94.6953	16.8863
ENSG00000225484	57.0905	42.9318	69.5376	47.1548	19.1075	30.8391
ENSG00000225488	0	0	0	0	0	0
ENSG00000225489	30.2451	68.5195	64.2359	24.205	34.1015	44.9444
ENSG00000225493	21.3887	5.051	0	1.21779	8.61887	1.98788
ENSG00000225497	0.604149	10.9144	2.58284	2.25551	4.65598	23.1956
ENSG00000225498	3.01333	7.77683	1.20774	1.87498	0	1.60685
ENSG00000225506	1.19912	6.18938	1.28161	1.49225	6.54584	4.26283
ENSG00000225516	0	0	0	0	0	0
ENSG00000225518	16.4783	0.867908	13.6582	2.09251	6.0473	2.86923
ENSG00000225519	0	0	0	0	0.933239	0
ENSG00000225520	0	0	0	0	0	0
ENSG00000225521	7.40867	10.8349	11.6136	8.60511	7.61282	21.0701
ENSG00000225527	54.8182	57.7978	37.8687	77.3701	22.3254	143.544
ENSG00000225532	3.1446	2.43469	2.68875	0	0	0
ENSG00000225535	0	0.973432	0	0.563262	0.581362	0
ENSG00000225537	0	0	0	0	0	0
ENSG00000225539	0	0	0	0	0	0
ENSG00000225542	0	0	0	0.974723	0	1.11378
ENSG00000225545	0	0	0	0	0	0
ENSG00000225546	0	0	0	0.516935	26.8552	0
ENSG00000225548	0	0	0	0.274323	6.79532	0
ENSG00000225552	0.343403	4.43129	1.83514	2.5641	0	7.32475
ENSG00000225554	1.23995	0	0	0	0	0
ENSG00000225555	5.86192	10.5899	3.75911	5.10643	1.50586	4.1678
ENSG00000225559	0	0	0	0	3.10399	0
ENSG00000225561	0	0	0	0	0	0
ENSG00000225563	0	0	0	0	0	0
ENSG00000225564	0	0	0	0	0	0
ENSG00000225570	0	0	0	0	0	0
ENSG00000225572	48.1563	34.1419	9.93888	38.8502	64.4137	43.9203
ENSG00000225578	16.2121	13.3128	8.40114	9.78191	22.0855	10.4788
ENSG00000225579	2.29697	0	0	1.14339	1.18014	0
ENSG00000225582	0	0	0	0	0	0
ENSG00000225588	0	0	0	0	0	0
ENSG00000225595	0	0	0.190504	0	0	0
ENSG00000225598	1.42808	0	0	0	0	0
ENSG00000225602	10.4938	5.60329	12.7627	15.761	19.9857	18.0095
ENSG00000225605	0	0	0	0	0	0
ENSG00000225606	0.909208	0	0	0	0	0
ENSG00000225610	31.8165	36.0382	92.5699	60.2712	59.4835	77.4154
ENSG00000225611	7.69499	6.75217	0	3.83043	2.76746	3.50151
ENSG00000225612	0	1.56261	0	0	0	0
ENSG00000225613	0	0	0	0	3.0704	0
ENSG00000225619	0	0	0	0	0	0
ENSG00000225620	0	0	0	0	0	0
ENSG00000225623	0	0	0	0	0	1.52765
ENSG00000225626	0	0	0	0	0	0
ENSG00000225632	1.24256	8.65837	1.32804	8.35006	9.57599	5.6541
ENSG00000225637	0	1.51822	0	0	0	0
ENSG00000225640	1.54244	0	0.824274	0	0	0
ENSG00000225643	0	3.68816	1.83286	11.3819	5.8738	13.8185
ENSG00000225647	0	1.07151	0	0	0	0
ENSG00000225649	0	2.87925	3.00689	1.328	0.498427	0.275901
ENSG00000225652	2.75702	5.59064	5.05147	5.88171	3.54125	15.6819
ENSG00000225655	0	1.04633	0	0	0	1.15303
ENSG00000225656	2.66331	3.43675	6.6419	2.20958	11.4029	0
ENSG00000225657	0	0	0	0	0	0
ENSG00000225670	0.371097	2.25751	0	3.29867	0	1.13078
ENSG00000225675	0	0	0	1.81793	0	0
ENSG00000225676	0	1.19556	0	0	0	0
ENSG00000225680	9.88775	0	6.90982	0	15.1426	2.16312
ENSG00000225683	1.29826	5.10561	0.925047	2.84658	2.46161	6.9449
ENSG00000225684	9.65424	1.1063	10.916	1.29884	0.813922	2.43822
ENSG00000225689	0	0	1.22699	0	5.16095	0
ENSG00000225703	26.2078	24.3809	6.51413	10.6187	37.5768	11.2669
ENSG00000225706	0	1.42853	0.82824	0.551066	0.995355	0.629682
ENSG00000225708	0	1.73963	0	2.34876	0	0
ENSG00000225718	0	0	0	0	0	0
ENSG00000225721	17.6846	8.84869	22.7586	9.88101	16.2249	2.56606
ENSG00000225725	1.06901	0.752431	4.88181	0.483759	0	0.967352
ENSG00000225730	2.47461	2.73708	2.64485	2.19968	0	1.00539
ENSG00000225731	10.2316	4.67181	12.7861	3.33012	10.5136	5.81971
ENSG00000225733	247.954	237.054	235.738	246.76	199.812	210.038
ENSG00000225738	1.01881	1.31467	0.725929	9.29763	0	1.93164
ENSG00000225742	0	1.83647	0	1.41686	3.29039	0
ENSG00000225744	0	1.34953	2.98071	0	13.433	0
ENSG00000225746	413.163	7.53667	0.903147	10.7942	15.0357	12.5462
ENSG00000225750	5.93755	12.7698	0	0	0	7.03596
ENSG00000225751	5.40608	9.46748	13.2068	12.4942	15.8716	15.9239
ENSG00000225752	32.1607	28.1889	4.53985	22.6543	10.1323	14.6688
ENSG00000225756	211.945	427.565	68.4267	241.428	819.016	289.27
ENSG00000225759	0	0	0	0	0	0
ENSG00000225761	6.24652	14.509	2.6705	6.21882	6.41865	7.99425
ENSG00000225762	17.7205	16.2279	12.83	17.7841	20.5583	18.6956
ENSG00000225764	0	0	0	0	0	0
ENSG00000225765	10.0806	34.6881	0	18.8173	3.59666	23.0945
ENSG00000225767	21.4071	33.2902	14.6665	23.9078	17.6258	46.0513
ENSG00000225768	0	0	0	0	0	0
ENSG00000225775	2.92386	5.92895	3.12501	10.9159	1.07301	8.90938
ENSG00000225778	11.3845	26.8785	29.3828	30.3291	19.1722	38.1334
ENSG00000225783	1.4938	7.10805	0.848175	11.1538	1.07927	13.1765
ENSG00000225785	0	0	2.05399	0	23.0387	0
ENSG00000225790	0	24.8121	0	14.1117	0	18.2282
ENSG00000225791	20.2789	45.8989	48.4476	30.3644	21.4506	36.7008
ENSG00000225792	1.56517	22.2168	5.35311	30.775	5.22698	39.6168
ENSG00000225793	13.6321	10.5546	12.6273	8.82159	2.10117	6.72006
ENSG00000225794	0	5.44765	0	4.7283	6.50699	2.40126
ENSG00000225798	18.7428	24.1858	12.3275	21.5304	13.8889	30.7525
ENSG00000225806	9.80224	4.45052	0	6.09923	0.233156	0.774372
ENSG00000225807	0	0	0	0	0	0
ENSG00000225811	0	0	0	0	0	0
ENSG00000225815	0	0	0	0	0	0
ENSG00000225818	0	0	0	0	0	0
ENSG00000225819	0	0	0	0	0	0
ENSG00000225822	2.8611	8.30695	12.2317	5.34077	4.59366	4.06846
ENSG00000225826	0	0	0.926984	1.07934	0	0
ENSG00000225833	0	0	0	1.79576	4.32476	1.36797
ENSG00000225836	2.25079	3.87257	3.2075	0	3.85468	2.13373
ENSG00000225839	2.69362	3.47586	2.87893	8.38024	3.45981	3.83031
ENSG00000225850	2.40084	0.885158	33.7246	5.97547	5.72696	2.92626
ENSG00000225855	201.104	15.9088	21.5694	29.9029	237.53	41.2036
ENSG00000225857	4.79847	0	1.57802	0.918689	0.94821	2.0995
ENSG00000225867	2.77205	5.72331	20.1467	0	4.27266	0
ENSG00000225870	0	0	0	0	0	0
ENSG00000225877	0	0.57065	0	0	0	1.67691
ENSG00000225879	0	0	0	0	0	0
ENSG00000225880	27.4629	44.0949	30.0243	37.5679	25.8501	22.0599
ENSG00000225881	0	0	0	2.74506	0	0
ENSG00000225882	3.89967	0	0	0	0	0
ENSG00000225884	0	0	0	0	0	0
ENSG00000225885	6.23263	12.244	0	14.7021	1.67279	24.3395
ENSG00000225886	1.50507	0.863176	1.0724	1.04055	0.644393	3.09139
ENSG00000225889	7.31605	9.5859	57.382	4.76235	4.62625	7.68248
ENSG00000225891	19.833	24.9191	17.8504	21.4338	27.4856	18.5542
ENSG00000225903	0	0	14.5604	0	5.83274	0
ENSG00000225905	2.03386	3.93675	26.0853	0	1.95929	0.723032
ENSG00000225913	8.92432	0	0	0	2.14928	0
ENSG00000225914	0.313176	2.46516	0.200833	2.4943	0.281581	3.11734
ENSG00000225916	7.51623	2.5864	0	2.4943	0	3.56267
ENSG00000225919	0	0	0	0	0	0
ENSG00000225924	0	0.522399	0	0	0	0
ENSG00000225929	0.68004	8.95078	2.61656	3.89289	5.59024	5.41526
ENSG00000225930	20.4942	0	0.279388	0.0650615	0	0
ENSG00000225931	4.25746	10.1636	6.37049	7.94733	4.37478	1.51352
ENSG00000225936	0	2.87319	1.58651	0	0	4.22158
ENSG00000225937	0	2.26223	0.0832764	3.5634	0	1.71734
ENSG00000225938	4.79572	20.3334	0	21.3145	7.91979	6.81947
ENSG00000225942	0	0	56.3354	0	0	0
ENSG00000225945	5.27153	0	1.40854	0	0	0
ENSG00000225948	1.10439	0	0	8.93333	0	2.35564
ENSG00000225951	67.8369	14.0059	7.25037	15.1956	13.0699	11.5756
ENSG00000225952	2.3008	0	0	0	0	1.63586
ENSG00000225953	6.23842	0.876742	0.264063	0.999254	4.91881	1.49313
ENSG00000225956	4.9524	0	5.29309	7.7038	19.0833	0
ENSG00000225960	0	0	0	0	0	0
ENSG00000225963	4.14071	5.05694	2.76597	6.71721	4.84364	9.04236
ENSG00000225964	1.41879	8.7879	0	2.47187	4.00919	8.47352
ENSG00000225970	0	0	0	0	0	0
ENSG00000225974	0	0	0	0	0	0
ENSG00000225975	35.6645	15.9667	28.005	20.8328	54.223	12.4199
ENSG00000225978	0.440111	0.378614	0	2.37336	0	0
ENSG00000225979	0	0	0	0	0	0
ENSG00000225981	13.8603	5.0079	2.96275	6.89939	16.3785	3.15347
ENSG00000225982	0	4.97853	0	0	4.3361	4.45754
ENSG00000225986	0	23.7517	3.47165	7.41076	6.25819	13.8567
ENSG00000225988	0	0	1.37749	0.356421	0	0
ENSG00000226004	0	0	0	0	0	10.2777
ENSG00000226005	0	0	0	0	0	0
ENSG00000226007	5.34223	3.13347	4.54184	8.31022	2.4952	4.83421
ENSG00000226009	10.0694	14.6702	4.86031	11.3182	2.92049	6.92835
ENSG00000226012	0	0	4.11275	0	0	2.73593
ENSG00000226017	19.1365	6.28051	1.77338	12.3891	0	9.43766
ENSG00000226022	0	0	0	0	0	0
ENSG00000226026	6.50287	68.9796	20.7329	49.9268	80.1281	52.8177
ENSG00000226029	24.1637	27.7775	16.5505	20.5413	26.9935	20.931
ENSG00000226031	0	1.24463	3.35037	1.20031	0	2.7431
ENSG00000226032	12.6605	28.9042	7.28617	39.3886	2.5018	56.7791
ENSG00000226037	0	10.699	0	4.6431	0	2.9475
ENSG00000226041	0	0	0	0	0	0
ENSG00000226043	0.634704	0	0	0	0	0
ENSG00000226047	0	0	1.79386	0	0	0
ENSG00000226051	0.56412	2.91177	0.775193	3.00867	1.24214	1.37515
ENSG00000226053	0.867059	0	0.132387	0	0	0
ENSG00000226063	0	0	0	0	0	0
ENSG00000226067	15.834	9.78686	76.3679	13.2468	8.54532	19.6776
ENSG00000226070	0	0	13.6085	0	0	0
ENSG00000226078	0	0	0	0	0	0
ENSG00000226079	0	0	0	0	0	0
ENSG00000226083	0	0	0	0	0	0.152114
ENSG00000226087	2.03912	0	0	0	2.61913	0
ENSG00000226088	2.881	8.05494	7.698	5.97547	2.467	0
ENSG00000226089	3.86394	9.51883	0	7.43133	0	5.49449
ENSG00000226091	0.87758	1.57282	0.885843	2.06287	0.876714	4.02105
ENSG00000226097	0.18693	0	0	0	0	0.265814
ENSG00000226101	1.60599	2.24507	29.18	7.16159	8.42312	2.47401
ENSG00000226115	0	0	0	0	0	0
ENSG00000226122	12.9031	1.60485	0	1.93463	2.79551	1.54744
ENSG00000226125	0.740772	0	1.01794	0.263388	0	0.752408
ENSG00000226130	0	0	0	0	12.2286	0
ENSG00000226133	0	4.10067	0	1.39576	0	3.9872
ENSG00000226134	0	0	0	0	0	0
ENSG00000226137	26.0304	41.2782	201.116	50.3903	50.5978	36.8506
ENSG00000226140	0	0	0	0	0	0
ENSG00000226143	35.1783	19.2582	18.7992	8.62291	32.8615	12.8848
ENSG00000226149	2.55645	2.8865	9.90464	1.59069	3.28362	3.18084
ENSG00000226155	0.3726	0.961609	0.796464	0	0	0
ENSG00000226159	0.890633	3.25629	0.475952	1.10835	0.953308	0.422158
ENSG00000226163	13.6344	46.1839	0	42.4185	6.56723	29.082
ENSG00000226167	25.9537	39.6547	37.6095	38.639	20.6561	30.5663
ENSG00000226169	0	0	0	0	0	0
ENSG00000226172	3.3825	2.1824	3.61519	0	0	0
ENSG00000226179	45.1559	14.9836	4.13678	9.63336	10.7715	5.50383
ENSG00000226180	20.4085	5.86743	4.85977	5.00054	6.65527	6.46575
ENSG00000226181	0	0	0	0	0	0
ENSG00000226193	0	0	1.53294	0	0	0
ENSG00000226194	0.514146	2.78652	1.75845	0	0	1.02356
ENSG00000226197	1.61775	0	5.76348	2.68429	0	0
ENSG00000226200	19.6068	22.1167	34.8073	19.6693	10.7646	8.50331
ENSG00000226203	0	0	0	0	0	0
ENSG00000226204	1.95351	0	0	0	0	0
ENSG00000226206	0	0	0	0	0	0
ENSG00000226207	0	0	0	0	0	0
ENSG00000226208	0	0	0	0	0	0
ENSG00000226218	0	0	0	0	0	0
ENSG00000226235	0	0	0	0.370647	0	2.11762
ENSG00000226237	0.314676	2.27393	0.336323	0.3916	0.889204	2.95327
ENSG00000226238	5.42547	0	0	0	6.96873	0
ENSG00000226239	0.41147	3.71674	6.74324	8.70495	4.22809	5.65603
ENSG00000226240	0	0.473457	0	0	0	1.30434
ENSG00000226245	94.7888	87.0167	240.016	57.7927	73.5409	56.0867
ENSG00000226249	2.28936	18.9069	0	3.9886	3.52866	10.4174
ENSG00000226250	0	0	0	0	0	0
ENSG00000226251	0	7.66935	6.92971	13.4477	12.4919	4.60986
ENSG00000226252	2.59952	10.5047	1.90098	7.49155	1.40587	4.96108
ENSG00000226258	0	0	0	0	0	0
ENSG00000226263	10.1631	4.37149	4.97851	5.26978	14.1417	6.62373
ENSG00000226266	10.0343	6.27799	13.1079	4.7931	5.98862	5.0445
ENSG00000226272	1.39443	7.1975	2.98071	13.5354	5.73141	11.104
ENSG00000226276	15.2982	61.1028	16.3506	63.4598	15.9069	12.4308
ENSG00000226277	0	0	0	1.01955	0	0
ENSG00000226281	0.419281	0	0	0.521776	0	0
ENSG00000226286	1.17738	0	52.2228	0	0	1.67423
ENSG00000226291	12.7992	9.43778	8.79407	4.55086	11.7427	9.10015
ENSG00000226296	0	0	0	0	0	0
ENSG00000226302	2.31043	0	0	0	0	0
ENSG00000226304	0	0	0	0	0	0
ENSG00000226308	0	0	0	0	0	0
ENSG00000226310	17.0225	15.5369	23.9622	22.2171	16.5317	20.6635
ENSG00000226312	23.3159	30.1692	20.29	34.0101	24.9567	36.9597
ENSG00000226317	0	0	0	0	1.16783	0
ENSG00000226320	0	0	0	0	0	0
ENSG00000226323	0	0	0	0	0	0
ENSG00000226328	29.2811	29.5978	78.1082	33.0988	59.5491	38.5147
ENSG00000226330	34.086	14.6616	24.2872	18.3813	14.5939	17.7723
ENSG00000226332	26.3528	20.9266	25.9991	21.6951	45.826	31.1318
ENSG00000226334	67.6995	46.3387	53.4811	79.1209	31.758	41.0186
ENSG00000226337	0	1.63899	0	0	0	0
ENSG00000226349	0	0	0	1.93028	0	1.47044
ENSG00000226352	71.9613	30.3214	24.3292	49.3453	46.2152	42.8108
ENSG00000226355	0	0	8.8527	0.858974	0	1.96303
ENSG00000226362	0	0	0	0	0	0
ENSG00000226363	1.72406	0	58.9654	0	1.58176	0
ENSG00000226364	0	0	0	0	0	0
ENSG00000226367	13.8722	15.2903	15.6503	15.7049	23.1388	20.6851
ENSG00000226370	0	0	0	0	0	0
ENSG00000226374	0	0	0	0	0	0
ENSG00000226375	3.20112	4.64708	2.13833	1.99182	5.13958	6.82794
ENSG00000226376	0	0	0	0	0	0
ENSG00000226377	1.86867	1.80851	7.48959	6.39507	6.60057	7.3074
ENSG00000226380	15.7674	35.0947	5.88486	14.5347	52.1847	46.9776
ENSG00000226383	49.5062	17.84	0	12.2711	15.0157	10.8415
ENSG00000226386	0	9.43778	6.83983	3.41314	0	0
ENSG00000226387	0	0	0	0	0	0.921612
ENSG00000226390	0	0	0	0	0	0
ENSG00000226397	0	0	0	0	0	0
ENSG00000226398	0	0	0	0	0	0
ENSG00000226403	28.8367	19.7931	72.1331	10.6895	3.94034	19.1941
ENSG00000226409	0	0.449276	0.558178	0	0	0
ENSG00000226412	0	0	0	0	0	0
ENSG00000226416	50.7746	8.35615	8.96595	15.2015	5.10396	16.9516
ENSG00000226419	10.6757	19.3636	1.9793	12.0992	15.2864	9.79774
ENSG00000226423	0	0	0	2.43249	0	0
ENSG00000226425	13.1177	0	24.0345	2.33206	1.60466	6.21775
ENSG00000226426	0	0	0	0	0	6.312
ENSG00000226431	2.63451	0	0	0	0	0
ENSG00000226433	0	0	0	0	0	0
ENSG00000226438	12.3699	22.9856	4.23068	25.8616	24.786	21.1079
ENSG00000226440	1.7373	0.862236	3.07088	0.74838	0.772429	0.760129
ENSG00000226441	0.887769	12.6014	11.3861	33.1437	18.2447	18.936
ENSG00000226442	12.5061	13.6552	0	16.7605	11.1208	20.5195
ENSG00000226445	0.563462	3.63547	14.4534	5.96023	5.42802	9.21424
ENSG00000226447	0	0	0	0	0	0
ENSG00000226453	60.7949	30.7732	10.4107	23.4076	24.1598	34.3889
ENSG00000226454	0	0	41.7788	0.256028	2.64255	0
ENSG00000226455	4.42935	10.2882	2.20923	17.2714	6.44783	7.1383
ENSG00000226465	13.2739	14.3881	10.7821	7.92899	6.13784	10.1927
ENSG00000226471	16.3404	13.8148	43.7616	19.6337	35.4631	22.1676
ENSG00000226476	0	0	0.305591	0.388164	1.33546	0.110885
ENSG00000226482	0	0.206957	0	0.299381	0.721003	0
ENSG00000226484	0	0	0	0	0	0
ENSG00000226486	0	0	0	0	0	0
ENSG00000226487	0	0	0	0	0	0
ENSG00000226488	0	0	2.23553	0	0	0
ENSG00000226496	0	0.292149	0	0.704366	0	0
ENSG00000226497	0	0	0	0	0	0
ENSG00000226506	0	0	0	0	0	0
ENSG00000226508	0	1.05929	0	0	0	0
ENSG00000226510	0	0	12.249	0	2.67646	0
ENSG00000226516	0	0.57837	0	1.11555	0	0
ENSG00000226519	0	2.09574	0	3.03167	0	0
ENSG00000226520	1.88141	3.64166	4.52438	9.95064	0	5.35069
ENSG00000226522	0	1.13826	0	0	0	1.25433
ENSG00000226526	1.30234	0	3.24785	1.62071	2.23038	4.32114
ENSG00000226527	0	0	0	0	0	0
ENSG00000226530	0.65659	0.847268	0	2.04274	0	4.2015
ENSG00000226533	16.763	18.45	5.26946	14.1117	25.3308	30.1466
ENSG00000226542	0	0	0	0	0	0
ENSG00000226548	0	2.18574	0	0	0	0
ENSG00000226562	13.5984	2.19343	0.778602	0	0	0
ENSG00000226566	0	0	0	0	0	0
ENSG00000226567	0	0	0.299078	0	0	0
ENSG00000226571	0.85373	1.10166	0.912461	0.849944	0.219314	0.809331
ENSG00000226576	1.16496	12.0262	4.35787	8.69847	8.22983	5.79799
ENSG00000226578	19.3888	8.50659	4.97343	10.134	8.46731	9.37403
ENSG00000226581	0.433432	0	0	0	0	1.23267
ENSG00000226587	0	0	0	0	0	0
ENSG00000226594	0	0	0	0	0	0
ENSG00000226599	1.79867	23.2102	1.44181	21.8241	8.08604	35.8078
ENSG00000226601	0	0	3.63561	0	0	0
ENSG00000226604	0	0.384332	0	2.03856	0	1.05881
ENSG00000226605	27.4996	69.5519	35.2697	131.413	83.3594	136.083
ENSG00000226609	4.6016	5.93793	1.40519	8.18071	3.37744	0
ENSG00000226619	0	0	0	0	55.244	0
ENSG00000226620	0	0	0	0	0	0
ENSG00000226622	0	7.23121	0	4.0233	0	6.43617
ENSG00000226627	15.6929	26.1037	26.8621	22.5805	46.4547	21.9664
ENSG00000226629	0	0	0	0	0	0
ENSG00000226640	3.4426	7.99622	0	8.56832	0	25.4558
ENSG00000226643	1.73645	0	0	0	0	0
ENSG00000226644	5.05671	0	160.516	0	18.8357	0
ENSG00000226645	22.404	49.3174	0.704272	1.64005	4.23187	5.62205
ENSG00000226647	55.9232	25.4843	26.3324	26.0369	38.929	41.1514
ENSG00000226648	25.3057	11.2098	27.2484	19.2711	25.9545	15.3068
ENSG00000226649	13.3288	9.00928	4.07021	4.73917	1.63049	0
ENSG00000226655	3.47291	0	0	0	0	0
ENSG00000226659	9.23399	2.38312	35.5292	5.17108	8.89542	11.1611
ENSG00000226661	0	0	0	1.62326	0	0
ENSG00000226664	0	0	0	0	0	0
ENSG00000226669	6.50595	9.96943	4.34595	5.56625	5.74512	2.89106
ENSG00000226673	2.3898	1.63827	4.15058	1.20819	2.3981	0
ENSG00000226674	0.99025	0.425941	1.74436	1.0954	18.2544	1.92966
ENSG00000226676	0	0	0	3.50091	1.0324	0
ENSG00000226679	0	0	0	0	0	0
ENSG00000226680	0	0	0	0	0	0
ENSG00000226681	1.55401	0	0	2.57853	0	0
ENSG00000226686	18.0529	2.76941	4.85745	0.157105	4.86462	1.43615
ENSG00000226688	16.1982	8.16182	11.5417	11.6834	6.53893	11.1878
ENSG00000226694	1.91734	0	0	0	0	0
ENSG00000226696	76.9884	35.1137	105.693	24.7781	58.821	19.5045
ENSG00000226698	9.92503	18.6288	9.64346	19.0883	9.27139	16.6794
ENSG00000226699	97.534	222.673	9.6225	78.4281	104.076	66.1457
ENSG00000226702	0	0	0	0	0	0
ENSG00000226706	43.2559	19.1375	55.7422	19.0712	31.1135	21.7919
ENSG00000226707	0	0	0	0	0	0
ENSG00000226708	0	0	0	0	0	0
ENSG00000226709	0	2.44863	0	0	0	0
ENSG00000226711	5.15348	2.59888	6.96415	4.34924	2.58688	4.80124
ENSG00000226715	5.0881	0.345564	2.71906	0	0.343968	0.380802
ENSG00000226716	0	0	1.12202	0.87095	0	0
ENSG00000226717	0	0	0	0	0	0
ENSG00000226722	0	0	0	0	0	0
ENSG00000226725	0	0	0	0	0	0
ENSG00000226733	22.4212	36.5841	0.594141	26.9799	0	20.8161
ENSG00000226739	0	0	0	0	0	0
ENSG00000226741	0	0	0	0	0	0
ENSG00000226746	19.6102	17.6635	45.2388	14.8599	17.7066	15.1852
ENSG00000226747	2.62592	1.69425	0	0.933668	2.89101	2.66716
ENSG00000226751	11.1233	10.7652	5.09508	17.3031	9.18468	11.298
ENSG00000226754	5.61076	0	10.7442	1.74559	3.0028	4.32166
ENSG00000226756	10.1279	17.0467	4.23574	8.76784	16.968	16.9065
ENSG00000226757	0	0	0.529309	0	0	0
ENSG00000226758	5.43497	6.54575	3.09806	9.0181	6.05013	4.12185
ENSG00000226759	0.509403	1.2325	0.136112	1.42634	0.0817875	0.724366
ENSG00000226762	0	0	0.124985	0	0	0
ENSG00000226764	0	0	0	0	0	0
ENSG00000226770	1.44251	5.58426	0.616698	1.43611	0.370565	4.10247
ENSG00000226771	1.30439	0	0	1.08217	0	0
ENSG00000226772	4.0979	12.5589	9.85458	8.28695	6.57942	7.28398
ENSG00000226777	0.53074	4.6499	0.328409	8.09959	2.00924	6.51431
ENSG00000226779	1.86192	4.1188	0	2.64809	0	8.69937
ENSG00000226780	0	0	1.87359	0	0	0
ENSG00000226782	0	0.682521	0	0	0	0
ENSG00000226791	1.44553	2.37404	3.93266	2.45304	0	0.5606
ENSG00000226797	0	0	15.205	7.86847	4.06066	2.997
ENSG00000226798	0	32.8801	0	10.425	0	16.8756
ENSG00000226800	40.5557	33.5231	38.2553	35.9216	45.6033	32.016
ENSG00000226803	45.0804	29.7742	21.8407	34.4428	40.8856	35.6044
ENSG00000226806	0.889677	0	0	2.39885	0	0.632556
ENSG00000226808	0	0	0.694329	0.898274	0	0.513211
ENSG00000226812	3.96165	36.1781	21.8223	60.2989	3.91425	5.63343
ENSG00000226813	0	0	0	0	35.8041	0
ENSG00000226816	1.09999	1.41943	0.653143	0.912589	0	1.73797
ENSG00000226819	0	0	1.25215	1.45795	2.508	0
ENSG00000226822	1.26479	2.30413	0.397588	1.3888	0.668934	1.48114
ENSG00000226824	2.64911	11.7746	17.3027	17.9487	9.82985	8.37114
ENSG00000226825	0	0	0	0	0	0
ENSG00000226828	0.460416	1.58433	0.98418	1.33692	1.97127	1.52765
ENSG00000226829	0	0	0	0	0	0
ENSG00000226833	3.648	3.96413	7.79793	2.62829	0.493228	1.63814
ENSG00000226835	5.07116	0	0	1.05181	2.89494	0.801238
ENSG00000226842	23.1068	27.5235	15.1978	30.9673	32.7234	18.5351
ENSG00000226846	0	0	0	1.81218	0	0
ENSG00000226849	15.2357	17.0035	10.4525	17.1667	18.2472	15.5169
ENSG00000226851	6.24829	6.55104	3.75645	8.74769	9.53039	7.21907
ENSG00000226853	3.14142	12.1611	14.9224	7.38435	3.58666	8.43782
ENSG00000226854	0	0	0	0	0	0
ENSG00000226856	7.84295	3.47895	0	1.83004	1.10183	3.83371
ENSG00000226859	0	0	0	0	0	0
ENSG00000226861	0	0	0	0	0	0
ENSG00000226862	7.91359	7.94246	5.63866	5.47117	6.77638	10.0027
ENSG00000226868	0	0	0	0	0	0
ENSG00000226869	0	0	1.74782	0	1.7504	0
ENSG00000226871	3.59902	4.64419	0	1.27966	0	0
ENSG00000226872	0.980804	0	0	2.44113	0	4.18408
ENSG00000226876	66.5292	16.5567	57.3927	27.2033	39.6747	31.0842
ENSG00000226877	4.49414	5.54711	3.96795	6.07908	3.76466	0
ENSG00000226883	1.79985	18.1157	2.69313	57.7876	42.9995	52.211
ENSG00000226889	5.28184	4.33727	11.2904	7.76811	4.93399	5.46235
ENSG00000226890	17.6232	12.9949	17.0417	12.5321	20.4802	7.16
ENSG00000226891	1.77594	10.4458	3.13409	16.7555	8.75304	16.3268
ENSG00000226899	33.2646	38.6323	14.5767	40.1545	37.5994	25.5431
ENSG00000226900	0	0	3.25809	2.7097	0	0
ENSG00000226903	0	0	0	0	0	0
ENSG00000226904	1.6241	0	0	0	0	0
ENSG00000226906	0	0	0	0	0	0
ENSG00000226913	6.57625	1.77933	1.24702	0.659988	2.45231	0.301657
ENSG00000226917	0.829118	0.713265	2.36308	0	0	0
ENSG00000226919	0.160056	0	0	0	1.02792	0
ENSG00000226920	20.2163	8.19882	24.6937	7.90688	20.7733	9.85623
ENSG00000226921	0	0	0	0	0	0.351483
ENSG00000226925	5.05936	12.1246	1.54497	10.7934	4.64176	9.24989
ENSG00000226927	0	0	0	0	0	0
ENSG00000226935	3.17352	25.3898	1.69592	18.5617	0	16.2458
ENSG00000226938	0	0	0	0	0	0
ENSG00000226939	0	0	0	0	14.007	1.40972
ENSG00000226944	3.65207	11.3104	11.7099	16.3614	0	8.30913
ENSG00000226950	56.1859	43.5015	180.412	38.4941	30.8847	41.4084
ENSG00000226953	2.72688	6.5977	0.728617	5.93859	2.18908	5.33169
ENSG00000226954	0	0	0	0	0	0
ENSG00000226956	0	0	0	0	0	0
ENSG00000226957	2.97793	0	1.81874	14.8236	6.55712	4.23459
ENSG00000226963	24.7398	10.2158	166.054	24.0143	92.7887	19.7007
ENSG00000226965	0	5.03825	0	0	1.43285	0
ENSG00000226968	0	0	0	0	0	0
ENSG00000226969	0	1.32445	0	0	0	0
ENSG00000226978	0	1.49696	0	0	0	0
ENSG00000226983	0	0	0	0	0	0
ENSG00000226985	0	0	0.284699	0	22.2393	0
ENSG00000226990	0	0	0	0	0	0
ENSG00000226992	0	0	0	0	0	0
ENSG00000226994	0	0	0	0.0794611	0	0.181594
ENSG00000226995	0	0	0	0	0	0.152469
ENSG00000226996	0	0	0	0	0	0
ENSG00000227006	36.877	22.3448	11.3101	11.9718	23.4773	16.8716
ENSG00000227007	0	0	0	0	0	0
ENSG00000227011	0	0	0	0	0	0
ENSG00000227012	0	0	0	0	0	0
ENSG00000227014	37.384	11.8089	14.047	15.3864	8.00295	20.2118
ENSG00000227016	0	0	0	0	0	0
ENSG00000227017	1.22892	10.0434	0	8.66621	4.20927	18.0576
ENSG00000227021	0	0	0	0	0	0
ENSG00000227028	3.42066	8.07139	2.64623	10.9462	4.30997	12.5541
ENSG00000227029	0	0	0	0	0	0
ENSG00000227033	11.2981	8.20073	7.54706	9.66621	5.4419	2.00822
ENSG00000227036	0.48008	0.95506	0.267243	0.510313	2.31239	1.3369
ENSG00000227039	14.1559	13.2982	4.35736	49.3258	4.94563	25.4437
ENSG00000227042	1.35563	2.33241	0.965925	0	0	0
ENSG00000227043	0	0	0	0	0	0
ENSG00000227045	5.7222	1.84599	0	0	2.7562	0
ENSG00000227047	0	0	0	0	0	0
ENSG00000227050	2.24926	5.80491	6.00998	2.7991	0.722262	3.19842
ENSG00000227053	14.9241	0.875371	5.8003	4.221	0	0
ENSG00000227060	2.12615	2.35166	0	0	0	0
ENSG00000227061	0	0	0.308995	0	0.148536	0
ENSG00000227066	1.36008	12.2854	0	8.593	28.2199	13.0918
ENSG00000227068	14.8298	7.31689	10.7221	10.8559	15.6867	11.7844
ENSG00000227070	7.54045	48.6511	11.1589	32.4822	11.9204	24.7441
ENSG00000227071	8.48523	4.2113	7.67374	4.87361	0.83837	5.56889
ENSG00000227075	0	15.461	0	5.18626	2.67646	3.70384
ENSG00000227076	5.20936	7.6825	3.18156	9.26118	1.91176	7.40767
ENSG00000227078	0	4.79602	0	1.98225	0	0
ENSG00000227082	2.84513	4.89516	0.760215	4.79462	1.75107	1.93859
ENSG00000227083	11.3748	10.0078	6.07863	4.50398	2.65641	3.67609
ENSG00000227088	0	0	0	0	3.7461	0
ENSG00000227089	0	0	0	0	0	0
ENSG00000227090	0	0	0	0	0	0
ENSG00000227091	0	0	0	0	0	0
ENSG00000227094	25.0997	4.13473	11.4155	13.9563	39.0985	12.1503
ENSG00000227098	0.854787	0	0	0	1.09793	0
ENSG00000227101	0	0	0	0	0	0
ENSG00000227107	4.6978	6.75487	13.9153	1.50331	7.41328	0.954318
ENSG00000227110	2.94993	2.20673	4.15813	2.12815	2.14162	4.86351
ENSG00000227115	0.041193	0	0	0	0	0
ENSG00000227117	0.5756	44.3179	0.410132	21.9668	25.1371	12.0046
ENSG00000227121	0	0	0	12.4189	0	0
ENSG00000227125	0	0	0	0	0	0
ENSG00000227128	0	0	0	0	0	0
ENSG00000227131	0	0	1.09495	0	0	0
ENSG00000227139	0	0	0	0	0	0
ENSG00000227143	0	0.373194	0.515171	1.19968	0	0
ENSG00000227145	0	0	0	0	0	0
ENSG00000227148	0	0	0	0	0	0
ENSG00000227150	0	0	0	0	0	0
ENSG00000227155	4.53744	5.41156	7.2009	7.87108	2.20761	8.89621
ENSG00000227157	0	0	0	0	0	0
ENSG00000227161	8.53906	11.0188	0	7.08432	14.6239	20.2375
ENSG00000227165	1.53223	0.456277	1.44868	1.90679	0.529864	0.754207
ENSG00000227167	0	4.50982	0	5.79898	0	8.28284
ENSG00000227169	0	0	0	0	0	0
ENSG00000227170	8.92849	13.2939	9.54271	31.6239	67.9268	33.2055
ENSG00000227172	0	0	0	0	0	0.948325
ENSG00000227175	4.35942	0	3.10621	0	0	0
ENSG00000227181	0	0	0	0	0	0
ENSG00000227186	8.71883	8.43812	7.76553	3.61673	6.53267	19.6303
ENSG00000227188	0	0	0	3.4497	0	0
ENSG00000227189	1.27527	8.06352	2.5897	7.14159	0.491405	4.89625
ENSG00000227192	20.5072	21.9445	6.415	15.5611	4.49713	11.3799
ENSG00000227193	0	1.44241	3.58409	0	0	1.5895
ENSG00000227195	0	0	0	0	0.337615	0
ENSG00000227197	22.1153	14.2689	14.0343	14.1908	10.2084	18.1808
ENSG00000227198	107.074	60.8793	193.804	59.7325	93.2684	47.2528
ENSG00000227199	12.4236	10.7505	37.4916	16.0063	23.0914	17.8741
ENSG00000227200	87.3441	49.6685	45.0942	61.7172	73.2079	47.3654
ENSG00000227206	0	0	0	0	0	0
ENSG00000227210	2.04138	1.97565	5.45453	1.9053	0	0
ENSG00000227213	66.3141	37.8492	14.993	42.056	133.498	64.3766
ENSG00000227214	16.5872	2.76183	34.5987	0.665871	10.6527	1.52173
ENSG00000227215	23.5832	5.19569	7.99202	8.58974	3.69407	7.36137
ENSG00000227217	1.09273	2.82013	0	6.79927	0.935701	7.25131
ENSG00000227218	5.03985	16.1173	11.4757	7.49898	4.64397	10.7499
ENSG00000227220	18.9642	22.3122	421.472	31.2354	38.687	43.623
ENSG00000227227	14.0224	9.35927	15.5039	33.6971	31.0535	36.4416
ENSG00000227230	42.5682	11.8074	21.6853	31.1904	32.7037	34.5086
ENSG00000227237	0	0	0	0	0	0
ENSG00000227240	0.99554	5.56681	0	1.65187	1.27872	9.90954
ENSG00000227244	1.58676	1.02378	0	0	0	0
ENSG00000227245	8.13643	0	4.63796	0	6.9672	0
ENSG00000227248	0	0.435013	1.08092	1.67809	2.16502	4.31436
ENSG00000227252	10.9684	6.39197	24.3282	2.78864	4.69609	6.54065
ENSG00000227253	22.6553	21.8456	30.3339	19.5186	15.3492	35.0478
ENSG00000227256	17.9516	3.70638	5.37225	4.02121	3.22811	6.63704
ENSG00000227258	1.2846	24.3911	5.49187	16.7855	9.54639	42.7966
ENSG00000227260	0	0	0	0	0	0
ENSG00000227269	0	0	0	1.56533	3.23126	0
ENSG00000227274	0	0.311703	0.258171	0	0	0
ENSG00000227278	47.2943	24.7414	43.034	32.6092	53.3588	20.9027
ENSG00000227279	23.8447	28.3401	41.5809	41.3869	56.4185	45.5067
ENSG00000227282	0	0	0	0	0	0
ENSG00000227290	1.24228	5.61065	0.66387	1.93245	0	1.32488
ENSG00000227292	0.443885	1.71837	0.474421	0	0.570146	0
ENSG00000227293	0	0	0	0	0	0
ENSG00000227294	0	7.74513	1.60375	6.22445	0	2.13373
ENSG00000227297	0	0	0	0	1.7236	0.954086
ENSG00000227301	0	0	0	0	0	0.686375
ENSG00000227303	0	0	0	0	0	0
ENSG00000227305	0	0	0	0	0	0
ENSG00000227306	6.58492	54.6249	8.04334	32.1932	108.141	70.2278
ENSG00000227307	2.34228	1.51125	0	0	0	0
ENSG00000227308	0.280681	0	0	0	0	0
ENSG00000227313	0	0	0	0	0	0
ENSG00000227330	2.31043	2.23604	0	0	0	1.64271
ENSG00000227336	0	0	0	0	0	0
ENSG00000227338	0	0	0	0	0	0
ENSG00000227342	0	0	0	0	0	0
ENSG00000227352	3.44045	2.21979	0	1.07037	0	2.44615
ENSG00000227354	7.22109	7.03614	4.41021	7.51918	3.21789	14.9834
ENSG00000227355	0.826141	4.69065	5.29785	7.19667	39.4742	3.5243
ENSG00000227356	0	2.55701	38.8276	0	0	1.8785
ENSG00000227359	16.7331	10.1612	13.6762	6.73705	20.8606	10.4975
ENSG00000227360	0	0	3.63859	0	0	0
ENSG00000227364	0	0	0	0	0	0
ENSG00000227365	0.589949	0	0	0	0	0
ENSG00000227373	1.19213	0	2.29345	1.48355	3.36869	0
ENSG00000227374	80.3189	60.459	49.4797	40.259	27.9406	43.623
ENSG00000227375	5.3785	2.10316	1.04518	2.83958	1.46542	1.8541
ENSG00000227386	0	0	0	0	0	0
ENSG00000227388	15.9509	9.73023	24.7975	10.4665	14.5279	10.31
ENSG00000227392	39.7932	109.355	28.3538	101.182	140.401	133.081
ENSG00000227398	10.9356	9.01965	9.2178	8.83877	5.64745	6.33236
ENSG00000227400	2.52527	0	0	0	0	0
ENSG00000227403	23.8114	14.5388	0	19.0803	7.01205	31.0518
ENSG00000227407	31.8372	4.71443	34.0274	7.14459	6.03341	1.48433
ENSG00000227409	42.7077	45.7958	83.5767	88.3302	67.2176	78.6924
ENSG00000227418	0	0	0	0	0	0
ENSG00000227421	0	0	0	1.10657	0	0
ENSG00000227431	3.97261	0	2.12295	0	0	0
ENSG00000227432	0	2.74587	0	1.98607	0	0
ENSG00000227438	0	4.77155	2.19561	1.53388	0	0
ENSG00000227439	0	0	0	0	0	0
ENSG00000227455	0	0	3.49759	0	0	0
ENSG00000227456	7.82834	8.68966	1.6194	5.02814	3.13545	6.94243
ENSG00000227459	0	0	0	0	0	0
ENSG00000227463	0	0	3.23467	1.02717	0	0
ENSG00000227466	1.21095	7.03176	0	3.01394	9.33239	7.74881
ENSG00000227467	0	9.88848	0.722669	6.45107	3.03969	7.21114
ENSG00000227475	0	0	0	0	0	0
ENSG00000227477	1.87184	1.55278	1.57191	1.99665	1.20214	1.71112
ENSG00000227479	0	0	1.37571	0	0.826645	0
ENSG00000227480	0	0	1.11355	0	0	2.96307
ENSG00000227481	10.5271	16.6715	11.7627	14.8869	5.5315	17.0107
ENSG00000227482	2.25753	3.20445	1.4477	2.8094	6.08932	1.6051
ENSG00000227484	1.55987	0	2.2229	0	0	0
ENSG00000227485	0	0	0	0	0	0
ENSG00000227486	5.48354	3.53799	5.86077	3.41201	0	4.28865
ENSG00000227487	0	4.46089	0	4.30204	9.17659	4.26034
ENSG00000227489	1.26844	14.1856	0	21.573	1.08616	14.4296
ENSG00000227492	15.9914	6.31695	10.813	9.34109	2.51511	4.64074
ENSG00000227495	25.0997	10.9999	17.7155	11.787	41.9717	11.4482
ENSG00000227496	1.98501	1.86288	0	0	0	2.05284
ENSG00000227498	0	0	0	0	0	0
ENSG00000227502	53.8162	26.5106	3.85599	34.546	2.31701	17.6709
ENSG00000227508	0.305839	1.3813	0.245159	2.28362	0.589251	0.978526
ENSG00000227509	0	0	0	0	0	0
ENSG00000227510	0	0.676367	0	0	0	0
ENSG00000227512	8.62801	20.6178	71.0402	22.2697	28.7317	17.2674
ENSG00000227516	2.74041	5.30436	7.32233	5.11548	0.879977	1.94842
ENSG00000227517	0	0.426882	0.212142	0.658691	0	0
ENSG00000227518	14.074	8.77587	11.9126	6.22999	20.1398	15.715
ENSG00000227519	0	0	0	0	0	0
ENSG00000227527	3.34156	3.77297	4.01787	3.11882	8.04759	4.75167
ENSG00000227528	4.63595	0.664694	1.10108	0	0.661624	0
ENSG00000227531	0	4.78866	0.793253	1.38544	0	9.49855
ENSG00000227533	0	0.211817	1.49124	0.714961	1.79213	3.85137
ENSG00000227535	3.26098	0	0	2.70543	6.98092	0
ENSG00000227540	19.3855	8.71739	30.1369	6.21386	2.64087	7.518
ENSG00000227542	4.85978	5.87914	12.0114	4.91382	9.75332	6.91057
ENSG00000227543	31.6053	19.3234	19.2366	28.9386	20.2514	18.6322
ENSG00000227544	2.51966	2.37601	1.45007	3.8592	0.497902	1.65366
ENSG00000227549	0	0	0	0	0	0
ENSG00000227554	4.55104	2.93634	0	4.71964	2.92278	3.23577
ENSG00000227555	0	0.392952	0	0.884238	0.651895	0.577363
ENSG00000227562	0	0	0	0	0	0
ENSG00000227564	0	0	0	0	0	0
ENSG00000227574	0	0	1.85981	0	1.49004	0
ENSG00000227579	1.17738	2.27895	1.88757	0.732601	0	3.34846
ENSG00000227588	0	5.01797	13.854	0.806549	0	10.1377
ENSG00000227589	0	2.83509	0	0	0	0
ENSG00000227591	0	25.3949	3.09319	12.9656	4.46076	6.5846
ENSG00000227598	56.6535	9.25392	16.8623	11.6017	8.29007	3.05927
ENSG00000227599	0	0	0	3.8995	1.118	0
ENSG00000227602	0	0	0	0	0	0
ENSG00000227606	0	0	0	0	0	0
ENSG00000227610	0	0	0	0	0	0
ENSG00000227611	0	0	0	0	0	0
ENSG00000227617	83.8367	73.8065	129.604	63.0301	44.1124	101.415
ENSG00000227619	2.25477	0	0.60247	0.561192	0	2.24438
ENSG00000227627	62.0123	48.1454	38.9145	46.5911	33.3809	39.5168
ENSG00000227630	2.60827	2.1737	0.580772	1.35245	3.0012	0.231809
ENSG00000227634	0.871883	24.7518	0	4.34008	2.98636	2.89289
ENSG00000227640	0	1.19228	0	0.731709	0.323667	0.358327
ENSG00000227646	3.88546	14.1567	0	4.83529	0	0.975016
ENSG00000227658	39.8564	14.0266	4.64709	19.8398	32.5776	30.9139
ENSG00000227659	48.0686	54.8511	14.8606	18.7862	22.9617	30.5047
ENSG00000227660	3.86689	1.99594	0	9.62436	0	6.04856
ENSG00000227673	3.51715	0	0	0	0	0
ENSG00000227674	0	0	0	0	101.985	0
ENSG00000227676	2.28809	3.93675	0	1.89829	0	0.542274
ENSG00000227678	5.51052	8.45941	1.72627	11.9417	3.29492	9.18694
ENSG00000227680	0	0	0	0	0	0
ENSG00000227681	0	15.1846	0	9.22024	0.559796	8.98626
ENSG00000227683	0	0	0	0	0	0
ENSG00000227685	0	0	0	0	0	0
ENSG00000227687	0	0	0	0	0	0
ENSG00000227695	31.5572	47.1273	14.4008	52.3621	21.5572	54.454
ENSG00000227698	8.64731	10.3615	1.98047	5.3806	3.96679	4.39157
ENSG00000227702	0	0	0	0.597547	0	0
ENSG00000227704	1.64834	5.31755	0	2.05128	5.293	0
ENSG00000227705	9.6776	15.4264	41.3734	14.1686	38.7535	18.6185
ENSG00000227706	0	0	0	0	0	0
ENSG00000227708	0	0	0	0	0	0
ENSG00000227712	7.37897	61.8921	0	47.8271	27.6438	32.3529
ENSG00000227713	0	0	0	0	0	0
ENSG00000227716	0	0	0	0	0	0
ENSG00000227718	0	0	0	0	0	0
ENSG00000227719	24.2375	7.47908	43.9256	20.9826	19.6265	27.7222
ENSG00000227723	0	0	0	0	105.431	1.0611
ENSG00000227726	8.04164	13.836	20.0547	18.347	27.5441	11.4351
ENSG00000227733	0.614319	0.206797	9.47759	0.299149	3.05332	0.987498
ENSG00000227734	0	0	0	0	0	0
ENSG00000227740	5.04285	7.0496	7.18636	3.13781	1.07955	0
ENSG00000227741	9.97306	8.8053	7.1061	7.18534	11.012	10.4496
ENSG00000227743	0	0	0	0	0	0
ENSG00000227744	0	0.306342	0	0	0	0
ENSG00000227748	0	0	0	0	2.33822	0
ENSG00000227751	168.676	69.8805	392.821	166.823	107.187	140.126
ENSG00000227757	0	2.0896	0	0	0	0
ENSG00000227764	0.458632	0	0	0	0	0
ENSG00000227769	0.506864	0	0.464343	0.27033	0.0930057	0.308896
ENSG00000227773	31.4306	17.4957	6.58683	23.0082	30.8719	13.1453
ENSG00000227782	29.2621	46.6446	37.8981	47.1258	66.7696	87.6267
ENSG00000227803	0	0	3.10621	0	2.79972	3.09953
ENSG00000227809	0	0	0	0	0	0
ENSG00000227811	2.59124	0.501562	16.4785	0	0	0
ENSG00000227818	0	0	0	0	0	0
ENSG00000227824	6.93129	1.49069	5.55609	6.46926	1.48381	0
ENSG00000227838	0	0	0	0	1.73202	0
ENSG00000227848	2.0007	3.22714	2.67292	2.48978	1.28489	0.711244
ENSG00000227851	0	0	0	0	0	0
ENSG00000227857	0	0	0	0	0	0
ENSG00000227863	0	2.12385	0	0	0	0
ENSG00000227869	0	0	0	0	0	0
ENSG00000227880	0	0	0	0	0	0
ENSG00000227885	51.0557	1.50074	5.84214	1.15784	13.8924	1.15764
ENSG00000227888	3.84095	1.74931	7.00295	0	6.38451	2.57026
ENSG00000227893	0	0	0	0	0	0
ENSG00000227895	5.46725	0	0	0	0	0
ENSG00000227896	37.8301	5.70881	23.5454	6.74146	7.76987	2.18257
ENSG00000227902	0	0	0	0	0	0
ENSG00000227906	18.5248	1.6373	7.97394	6.50547	4.82402	2.52596
ENSG00000227907	0	0	0	0	0	0
ENSG00000227908	2.05052	2.80165	4.25425	2.85199	1.54928	0.686075
ENSG00000227911	67.7379	45.3643	21.9943	30.4109	31.3881	37.7975
ENSG00000227912	0	0	0	0	0	0
ENSG00000227914	7.09112	7.37937	10.5127	2.84664	3.52574	5.2044
ENSG00000227917	0.715275	0	0	0	0	0
ENSG00000227920	0	3.5699	0	11.7055	1.06602	4.32733
ENSG00000227925	0	0	0	0	0	0
ENSG00000227927	3.29996	4.61314	1.17566	1.7111	2.47252	2.7373
ENSG00000227929	2.70904	1.74788	0	5.05692	1.44984	3.53121
ENSG00000227930	0	0	0	0	0	0
ENSG00000227933	1.92402	3.72414	2.05638	6.58447	0	0
ENSG00000227935	24.9579	3.01929	0.416794	0	0	1.66359
ENSG00000227938	0	0	0	0	0	0
ENSG00000227940	0	0	0	0	0	0
ENSG00000227945	30.8405	17.0558	9.81017	28.7848	16.0338	33.4133
ENSG00000227946	50.7334	22.3965	68.4928	28.5771	54.8752	28.4773
ENSG00000227947	0	0	0	0	0	0
ENSG00000227953	69.9943	29.6897	86.2161	41.4826	17.8918	33.3085
ENSG00000227954	0.351178	3.76125	2.66489	2.27253	0	2.79649
ENSG00000227958	0	0	0	0	0	0
ENSG00000227959	6.10833	8.67043	9.46638	13.6828	0	11.7261
ENSG00000227960	0	4.15482	0	4.00688	9.30518	11.4463
ENSG00000227963	1.6919	4.23001	3.27752	0.921152	2.98808	5.41319
ENSG00000227964	0	1.22537	0	1.03402	0	0.506371
ENSG00000227981	0	0	0	0	0	0
ENSG00000227987	0	0	0	0	0	0
ENSG00000228005	0	0	0	0	0	0
ENSG00000228008	4.49668	1.54734	4.80603	2.98449	1.5402	2.98398
ENSG00000228010	3.41604	9.33474	0	13.2535	0.774303	4.2861
[truncated: 14,055 more rows]
