# Supplementary material for: High-throughput sequencing approach for the identification of lncRNA biomarkers in hepatocellular carcinoma and revealing the effect of ZFAS1/miR-150-5p on hepatocellular carcinoma progression
Source: PeerJ. 2023 Feb 23;11:e14891. doi: 10.7717/peerj.14891 (PMC9968462; doi:10.7717/peerj.14891)
Supplement: Supplemental Information 5 [file peerj-11-14891-s005.xlsx]

## Sheet: supplemental material 5
gene_id	1A	1B	5A	5B	6A	6B
ENSG00000000003	13.5097	18.0889	3.74133	19.9122	8.62225	16.6399
ENSG00000000005	0.109381	0.184793	0.0102117	0.165363	0.154792	0.167755
ENSG00000000419	21.112	14.0725	13.7302	12.0514	19.3674	13.8288
ENSG00000000457	5.2015	4.66828	8.30998	5.22883	6.64044	4.59103
ENSG00000000460	6.33939	1.37342	4.51316	2.01185	5.05364	2.34011
ENSG00000000938	1.38896	1.65832	0.501648	3.35806	0.659984	3.03206
ENSG00000000971	247.196	339.48	11.9355	389.071	672.744	389.657
ENSG00000001036	48.6067	22.8151	23.7812	21.1701	15.2402	18.0638
ENSG00000001084	10.1597	23.1178	1.74182	17.1768	20.5633	17.7059
ENSG00000001167	22.4162	9.97848	13.2269	8.47204	17.4928	7.36341
ENSG00000001460	0.182084	0.352744	0.525426	0.366843	0.655907	0.314164
ENSG00000001461	0.840819	1.4323	3.02802	1.84534	1.24555	1.84385
ENSG00000001497	11.4504	4.34086	3.94179	4.76787	10.5635	5.19006
ENSG00000001561	3.26385	3.35542	11.3152	4.43888	11.3168	5.85932
ENSG00000001617	2.70031	1.41792	4.1085	1.74527	3.8317	1.17526
ENSG00000001626	0.00376975	2.31591	0.124938	3.03348	0.013337	10.1409
ENSG00000001629	9.79563	7.85233	14.384	8.70022	8.00775	9.37915
ENSG00000001630	117.298	19.1079	33.8128	32.6445	150.19	68.2224
ENSG00000001631	8.23181	7.78624	5.54122	7.77121	5.46314	8.2715
ENSG00000002016	4.39629	2.94353	3.18222	2.70335	2.47431	2.28832
ENSG00000002330	3.24782	8.21859	23.7853	8.09132	11.3081	9.39293
ENSG00000002549	10.5476	40.2381	11.1459	39.0063	21.794	47.5166
ENSG00000002586	29.4128	20.4008	11.3332	22.4736	16.195	15.8632
ENSG00000002587	0.120767	0.291468	0.289919	0.483114	0.13123	0.360512
ENSG00000002726	0.128946	0.0919482	0.0300956	1.53801	0.0782057	0.113007
ENSG00000002745	0.0918052	0.0580584	0.0302499	0.155862	0.09935	0.140799
ENSG00000002746	0.0302649	0.0600397	0.0506233	0.0918557	0.0571063	0.0928331
ENSG00000002822	3.77052	1.74327	1.826	1.95165	1.88894	2.03966
ENSG00000002834	59.9043	21.4813	22.8602	26.4483	29.1287	21.0224
ENSG00000002919	3.58947	4.02779	6.10034	3.75866	3.26897	3.67006
ENSG00000002933	68.4674	92.3669	11.734	90.9269	110.625	90.6136
ENSG00000003056	13.8337	15.4605	22.7742	23.0689	15.5916	22.2962
ENSG00000003096	3.37177	1.82818	0.178935	0.835307	1.19201	1.14873
ENSG00000003137	0.372224	0.84134	0.816304	0.410222	0.114296	1.16328
ENSG00000003147	1.57705	1.22212	7.64392	2.41982	2.34388	2.31928
ENSG00000003249	0.885849	0.931484	2.00062	5.76914	3.13145	2.75667
ENSG00000003393	8.29981	10.1322	8.0225	7.94805	9.82078	7.9382
ENSG00000003400	1.73369	3.67365	2.88655	4.42778	1.90569	4.43982
ENSG00000003402	4.33987	6.35445	7.1991	7.19787	6.08299	7.03358
ENSG00000003436	12.3772	45.4584	3.18599	37.3522	19.6262	47.9187
ENSG00000003509	4.49063	4.74858	2.84146	4.05042	6.43005	4.34979
ENSG00000003756	18.8554	12.1356	7.69553	11.9825	10.5066	12.4649
ENSG00000003987	3.493	1.99098	4.96517	1.25863	1.42296	1.54213
ENSG00000003989	27.114	179.851	26.8253	34.1936	41.5611	141.928
ENSG00000004059	23.8884	18.9372	55.9304	18.7183	22.2842	20.2962
ENSG00000004139	5.99768	5.9427	7.72808	4.28775	3.57365	3.2909
ENSG00000004142	66.3565	75.4279	72.8093	57.6949	64.1075	55.3798
ENSG00000004399	8.52308	10.0016	11.1868	14.4254	14.3316	9.86544
ENSG00000004455	12.1339	26.3385	10.7711	20.9574	13.8555	18.8924
ENSG00000004468	1.06613	2.7619	0.199065	2.96934	0.636218	3.58933
ENSG00000004478	26.0654	21.3504	14.2889	10.5783	22.2706	11.5908
ENSG00000004487	11.4468	8.37261	5.96886	7.99503	7.89793	8.29621
ENSG00000004534	18.9103	12.0344	5.71668	11.1469	12.4164	12.4945
ENSG00000004660	0.199255	0.258665	0.582426	0.772647	0.312191	0.640291
ENSG00000004700	9.77475	5.09725	5.96621	7.20071	6.16772	7.07028
ENSG00000004766	2.69214	2.24424	2.68881	2.75536	2.83715	2.60562
ENSG00000004776	0.470702	3.31604	1.44251	3.20645	0.593715	3.892
ENSG00000004777	0.749948	0.550194	1.39403	0.929473	1.42612	0.662379
ENSG00000004779	6.22968	12.3063	24.4968	12.6159	10.8097	12.5928
ENSG00000004799	3.18772	285.366	4.48948	43.136	94.7504	87.0324
ENSG00000004809	0.202833	0	0	0	0.0382722	0
ENSG00000004838	1.69119	0.755614	0.278866	0.253562	0.602991	0.235795
ENSG00000004846	0.0875098	0	0.0213125	0	0.349984	0
ENSG00000004848	0.0284314	0	0	0	0	0
ENSG00000004864	34.0151	49.6759	18.6876	34.4323	55.432	42.3766
ENSG00000004866	4.03561	6.43879	8.00094	4.85354	4.62428	5.01554
ENSG00000004897	15.2955	8.45018	9.02028	7.05096	6.78185	7.65455
ENSG00000004939	0.0205969	0.0579953	0	0.0141539	0	0.0210594
ENSG00000004948	0	0.0639861	0.0544527	0.0629842	0.253519	0.0191686
ENSG00000004961	7.6098	5.91905	5.23149	6.50944	5.40056	5.40172
ENSG00000004975	5.35224	3.49335	7.30156	3.70059	6.54948	3.43287
ENSG00000005001	0	0.260611	1.09514	0.202791	0	1.01834
ENSG00000005007	14.8603	10.0703	12.1394	10.7254	17.0249	9.38079
ENSG00000005020	4.1729	3.64055	3.04095	4.39339	3.45832	5.63169
ENSG00000005022	104.747	88.4074	302.27	92.5204	84.5339	80.7018
ENSG00000005059	1.48646	1.36524	0.663903	2.09045	0.46824	1.61325
ENSG00000005073	0.190836	0	0	0	0	0
ENSG00000005075	7.12214	6.2677	12.3518	5.5551	6.38212	5.46152
ENSG00000005100	5.14336	3.83226	4.1214	3.48291	5.95028	3.60606
ENSG00000005102	0.039033	0.0699403	0.0971751	0.625865	0.055238	0.319274
ENSG00000005108	3.90751	2.64554	0.714556	3.41266	0.72742	4.37664
ENSG00000005156	3.12431	3.13618	3.76055	2.48419	3.88513	2.46274
ENSG00000005175	5.18723	3.08619	2.35567	3.4049	3.30219	3.52352
ENSG00000005187	1.23151	23.0497	0.201779	10.2295	1.22346	17.4095
ENSG00000005189	2.56836	0.539098	2.0621	0.953063	0.484619	0.997888
ENSG00000005194	5.34986	4.73263	5.13043	5.39379	5.5397	4.03321
ENSG00000005206	4.76938	3.63787	3.82082	4.67089	4.35516	3.56832
ENSG00000005238	0.541309	1.77668	1.14154	2.05437	1.35321	1.58031
ENSG00000005243	2.56878	6.80922	4.38777	4.49804	5.14318	5.32585
ENSG00000005249	0.130508	1.87286	0.251295	2.07952	0.369379	3.11494
ENSG00000005302	2.56953	1.82525	1.3936	2.41041	1.11867	2.06569
ENSG00000005339	5.92242	8.27889	8.82107	7.07877	10.8521	8.68906
ENSG00000005379	1.69993	1.94622	0.689257	1.33656	2.75467	1.38683
ENSG00000005381	0.0349611	0	0	0.260839	0.0918832	0.153197
ENSG00000005421	6.28054	209.127	0.55151	147.902	28.0983	163.253
ENSG00000005436	9.43517	7.09208	5.34289	6.63426	4.56933	5.21887
ENSG00000005448	2.89402	1.19158	2.91451	1.35402	1.21122	1.19933
ENSG00000005469	8.91307	14.3899	7.50552	8.69639	10.351	7.45327
ENSG00000005471	5.4561	35.1957	0.134046	30.9062	7.74707	31.4442
ENSG00000005483	14.8423	11.7347	12.4174	11.1983	12.7861	12.8475
ENSG00000005486	6.82484	6.69248	17.606	6.48457	6.5137	5.25567
ENSG00000005513	0.0119204	0.0305132	0.0556435	0.103759	0	0.103598
ENSG00000005700	15.7286	15.2972	14.8782	14.7766	12.8094	17.9727
ENSG00000005801	2.19998	1.21481	1.23541	1.77529	0.976773	1.93265
ENSG00000005810	12.4482	12.7339	6.8805	14.0437	7.75233	13.1884
ENSG00000005812	5.75657	9.27279	3.23152	8.16111	7.03096	9.3817
ENSG00000005844	5.92636	7.66859	0.635075	10.7179	8.89505	7.30718
ENSG00000005882	5.28858	7.2737	3.68951	4.40257	6.00645	5.03609
ENSG00000005884	0.449153	0.996117	0.746395	1.1062	0.483074	1.47415
ENSG00000005889	13.6604	5.39322	6.64946	5.02167	13.5459	12.3641
ENSG00000005893	20.0866	48.4946	17.7707	64.2044	80.0593	56.6712
ENSG00000005961	0.0253798	0.0779591	0	0.135164	0.0538747	0
ENSG00000005981	0.103253	1.0161	0	0.50456	0.221886	1.17301
ENSG00000006007	3.92405	6.81685	11.5264	5.77674	4.08587	5.96318
ENSG00000006015	3.28692	3.29058	5.30302	3.86388	5.85693	3.75075
ENSG00000006016	1.16119	0.367437	0.800795	0.58543	0.776218	0.420611
ENSG00000006025	2.23211	0.798403	0.282686	1.43628	0.398168	0.830149
ENSG00000006042	5.49327	5.55852	15.1318	5.48268	8.92698	3.63968
ENSG00000006047	0.125843	0.122994	1.21401	0.324944	2.7037	0.239791
ENSG00000006059	0	0	0	0	0	0
ENSG00000006062	1.50711	3.09094	4.40866	4.59876	2.78773	5.56609
ENSG00000006071	0.00559593	0.0107431	0.142362	0.0173044	0	0.00429117
ENSG00000006116	0	0	0	0	0	0
ENSG00000006118	1.99331	0.278988	0.678345	1.01193	0.771194	1.06608
ENSG00000006125	16.5659	17.3611	23.7478	18.6237	8.12324	11.566
ENSG00000006128	0	0.0286514	0	0	0	0
ENSG00000006194	1.91445	1.5422	3.5746	1.89582	2.18893	1.53613
ENSG00000006210	2.39593	4.10021	7.47709	2.72654	3.63639	5.13719
ENSG00000006282	5.45107	6.55775	8.66554	6.02697	5.89768	6.23471
ENSG00000006283	0.00544146	0	0	0	0	0
ENSG00000006327	3.40201	1.24404	29.9725	7.34737	6.52707	9.26594
ENSG00000006377	0.0663772	0	0.185907	0.0210523	0.0361287	0
ENSG00000006432	1.61516	1.08528	1.23711	0.881285	3.1992	1.50024
ENSG00000006451	10.153	5.44628	8.92694	7.70669	5.96349	7.1851
ENSG00000006453	12.8756	8.99121	13.7064	9.27163	8.32104	11.2583
ENSG00000006459	4.65564	7.68098	13.9756	10.5205	7.76189	14.1974
ENSG00000006468	1.78741	0.857873	0.19491	0.546181	0.474277	1.13472
ENSG00000006530	2.48661	1.2212	1.79559	1.28802	1.83919	1.33466
ENSG00000006534	0.847829	0.840879	3.67474	1.51589	1.80913	1.23915
ENSG00000006555	0.407177	1.63041	0.021722	1.15919	1.21418	1.09729
ENSG00000006576	1.66205	1.59541	2.39215	2.1387	1.7727	3.24253
ENSG00000006606	0	0	4.44787	0.17141	0	0
ENSG00000006607	3.40038	5.82486	4.87304	4.45842	3.67953	4.24815
ENSG00000006611	0.0107731	0.474314	1.40806	0.231963	0.0101638	0.638866
ENSG00000006625	11.3359	4.86066	16.029	4.16772	5.27457	4.80304
ENSG00000006634	2.53608	0.537043	1.44929	0.517544	1.26701	0.84273
ENSG00000006638	0.239597	1.09427	1.49515	3.27561	0.803058	2.50456
ENSG00000006652	4.74768	5.29815	3.27763	4.82511	4.01993	7.53746
ENSG00000006659	0	0	14.0638	0.0897242	0	0
ENSG00000006695	2.58715	4.57035	9.73906	4.33397	3.31554	4.95555
ENSG00000006704	3.32803	1.54007	4.49352	1.58672	1.42672	1.37994
ENSG00000006712	14.1451	10.5025	6.4765	7.42059	12.9185	8.14915
ENSG00000006715	6.47438	8.43548	10.7948	10.6139	7.65121	10.442
ENSG00000006740	0.654626	0.646958	0.628864	0.513739	0.145002	0.59948
ENSG00000006744	7.84072	7.17415	6.01146	6.82035	9.67797	6.60636
ENSG00000006747	0.0439389	0.0186161	0.0735544	0.0291528	0.117929	0.141747
ENSG00000006756	5.44845	20.491	0.551925	11.7332	10.862	28.3917
ENSG00000006757	5.05128	6.07593	3.67422	3.4817	2.54937	6.21646
ENSG00000006788	0	0.0397749	0.0268641	0	0.0122164	0
ENSG00000006831	22.7395	32.5732	14.4857	21.082	24.7435	28.9293
ENSG00000006837	0.437811	0.398139	0.285039	0.332525	0.130437	0.3534
ENSG00000007001	0.0416884	0.576245	0.00555996	5.18112	0.615243	2.58486
ENSG00000007038	0	0.0687517	1.99764	0.0492183	0	0.123578
ENSG00000007047	7.55071	3.39506	8.81709	4.69325	14.7107	3.18368
ENSG00000007062	0.156347	1.13878	0.740876	1.02881	0.0435809	2.2707
ENSG00000007080	8.76276	4.90429	10.2904	4.7094	7.7467	4.47432
ENSG00000007129	0.107599	0.702339	0.192535	1.45416	0.279162	0.563826
ENSG00000007168	8.74344	12.2671	12.9067	15.3283	9.64418	15.7592
ENSG00000007171	0.0523999	0.0247626	0.195679	0.40994	0.0855627	0.327639
ENSG00000007174	0.0103713	0.0318574	0.0203332	0.0156793	0.014677	0.0143155
ENSG00000007202	26.7007	12.1806	21.8831	10.6981	8.78664	9.59267
ENSG00000007216	0.584102	0.586883	20.5689	0.187563	0.0386261	0.0920939
ENSG00000007237	0.819493	1.00957	39.51	2.35082	0.498431	1.9735
ENSG00000007255	9.92826	8.78373	17.9563	9.75388	15.7062	7.70021
ENSG00000007264	0.255161	0.607429	0.361293	1.19817	0.132401	0.821803
ENSG00000007306	0	0	0.148954	0	0	0
ENSG00000007312	0.355594	1.22231	0.703477	2.26904	0.730872	1.72699
ENSG00000007314	0.153821	0.0951548	0.141611	0.132129	0.43234	0.140892
ENSG00000007341	1.32876	1.61395	1.86887	1.65611	1.20752	1.47181
ENSG00000007350	0.0144743	0.0592809	0.013513	0.119358	0.252629	0.0887955
ENSG00000007372	0.0287696	0.00519833	0.0126395	0.0407029	0.0131721	0.0129774
ENSG00000007376	0.79498	2.34426	2.38092	2.91941	3.66308	2.16537
ENSG00000007384	2.16815	1.00174	3.87768	2.76804	2.17062	1.68186
ENSG00000007392	0.678639	6.9369	3.61506	8.83711	5.93178	8.1953
ENSG00000007402	0.097495	0.31231	0.176839	0.497691	0.756871	0.269146
ENSG00000007516	0.96562	1.67668	1.19307	1.81149	2.7168	1.34911
ENSG00000007520	5.51122	8.05097	23.1203	9.17109	14.2953	8.19167
ENSG00000007541	1.2878	2.18319	4.0374	2.52932	2.16613	1.84181
ENSG00000007545	3.60705	1.85094	2.58207	2.67093	2.76509	2.07734
ENSG00000007866	11.9792	6.10021	4.81998	5.55416	14.4817	4.8768
ENSG00000007908	0.0921809	0.808163	0.0251005	1.55723	3.67437	1.75541
ENSG00000007923	8.24913	9.15754	3.91047	6.07101	5.63346	5.87675
ENSG00000007933	14.4524	137.195	0.987493	215.899	209.62	134.388
ENSG00000007944	2.12509	4.69063	4.39614	5.87322	2.92518	5.70805
ENSG00000007952	0.174085	0	0.0325046	0.0287107	0	0.0320387
ENSG00000007968	0.919729	0.0644328	1.91915	0.248373	0.379052	0.0692909
ENSG00000008018	33.5425	25.5363	19.4943	23.9993	14.2172	28.3136
ENSG00000008056	0.571347	0.113226	1.28619	0.341959	0.0195617	0.169599
ENSG00000008083	7.47161	4.42463	4.78875	4.25717	8.02959	4.37796
ENSG00000008086	1.53363	1.62361	0.914716	1.09144	1.66241	1.38088
ENSG00000008118	0.0197426	0.90965	0.595949	0.633115	0.102443	0.232137
ENSG00000008128	2.57357	1.48439	1.0387	3.00158	2.45982	2.48197
ENSG00000008130	7.63222	11.1101	6.2605	10.3678	8.60398	9.8773
ENSG00000008196	0.00859183	0	0	0	0	0
ENSG00000008197	0	0	0	0	0	0
ENSG00000008226	0.874395	1.27482	0.108449	0.461537	0.804017	0.984723
ENSG00000008256	1.19161	2.90587	2.91847	2.50449	2.47156	2.28327
ENSG00000008277	1.18086	0.532114	0.902971	0.234115	0.0551588	0.389665
ENSG00000008282	16.7437	15.8095	39.0499	25.4633	36.4758	20.4973
ENSG00000008283	2.58859	2.33864	14.1354	2.34752	10.5636	3.04609
ENSG00000008294	8.67197	13.2307	7.75108	13.7231	13.8659	15.0068
ENSG00000008300	2.43852	0.235903	0.00592547	0.233779	1.87186	0.161588
ENSG00000008311	4.68741	50.7181	0.759192	52.3232	17.6584	42.6808
ENSG00000008323	2.52168	1.84122	1.96827	1.47718	1.85449	1.06513
ENSG00000008324	3.85312	3.77157	5.88981	4.10222	4.97279	3.84946
ENSG00000008382	6.06781	8.14444	6.25056	6.82742	15.5197	7.85609
ENSG00000008394	11.0467	34.7793	0.0574545	25.2799	20.5904	15.1089
ENSG00000008405	3.54504	4.3974	3.72208	3.586	3.47582	6.18392
ENSG00000008438	1.29632	0.826434	1.9866	0.571462	0.623039	0.150048
ENSG00000008441	4.63034	10.4505	13.3415	10.1467	17.3961	9.05145
ENSG00000008513	7.31512	43.69	2.45721	18.896	37.6611	23.2161
ENSG00000008516	0.606077	0.694855	0.4423	1.51343	0.664414	0.824791
ENSG00000008517	8.0616	14.2525	3.80665	58.7994	27.4378	37.7902
ENSG00000008710	3.21476	5.0235	8.42002	4.20799	4.79416	3.42782
ENSG00000008735	6.43416	0.0916689	0.370552	0.131249	0.511016	0.233425
ENSG00000008838	11.6484	5.13588	5.68651	4.30038	6.75481	3.99194
ENSG00000008853	4.46683	2.31009	2.37367	2.1003	1.79526	1.51872
ENSG00000008869	7.80085	9.4595	8.43879	9.88062	9.08972	9.06102
ENSG00000008952	8.93847	28.6367	15.1717	23.5315	14.0922	28.9471
ENSG00000008988	65.9539	39.1108	193.796	51.1716	47.336	45.6951
ENSG00000009307	45.6078	76.9981	75.0393	60.625	55.86	68.4471
ENSG00000009335	11.5155	8.06714	4.41156	7.40793	11.1471	7.99127
ENSG00000009413	8.74921	9.97852	4.81249	9.26438	3.47598	9.21662
ENSG00000009694	0.652742	11.8959	0.00509951	8.08146	0.14687	7.59827
ENSG00000009709	0.00836863	0	0	0	0	0
ENSG00000009724	6.31754	51.0589	0.305534	41.2836	56.1981	41.4501
ENSG00000009765	0.0747787	14.4892	0	11.6975	1.13039	8.1714
ENSG00000009780	1.68508	2.46064	1.53649	2.99389	2.14372	2.63123
ENSG00000009790	0.733956	2.02765	0.169712	3.66013	0.530588	2.05614
ENSG00000009830	3.14622	1.29721	3.10154	1.35913	2.38558	1.00392
ENSG00000009844	5.45869	4.46189	2.70316	3.55614	1.9012	3.8791
ENSG00000009950	74.8963	82.9664	24.9873	80.2095	177.153	60.9559
ENSG00000009954	25.3956	17.3909	19.287	16.4099	17.5931	17.0905
ENSG00000010017	16.5055	16.7922	12.8894	14.2456	19.5084	15.8727
ENSG00000010030	0.0815983	0.239252	0.0623283	0.244682	0.293936	0.716741
ENSG00000010072	3.16665	1.82267	2.1073	1.55316	2.39257	1.69661
ENSG00000010165	11.481	5.45603	10.4049	4.64836	15.6419	4.67905
ENSG00000010219	1.15588	0.437106	0.999874	0.83033	0.211978	0.884462
ENSG00000010244	9.36463	10.3326	8.60978	10.6433	7.29358	10.9167
ENSG00000010256	33.1038	41.8241	20.7441	31.4431	30.1585	31.2569
ENSG00000010270	4.03403	2.40735	6.37516	3.223	1.79976	3.7581
ENSG00000010278	1.21772	5.89642	7.48027	9.21054	6.42037	9.41573
ENSG00000010282	0	0.0187111	0	0	0.0344816	0.0934231
ENSG00000010292	19.7957	4.27781	16.8463	3.58551	4.33736	3.67637
ENSG00000010295	5.2733	3.96633	3.46006	5.11693	8.01341	3.60253
ENSG00000010310	0.137581	0.336944	0.159687	0.393505	0.142078	0.404901
ENSG00000010318	2.36932	1.91184	0.649429	1.50236	2.79044	1.50805
ENSG00000010319	1.24408	0.286068	0.987564	1.47315	1.75063	1.25045
ENSG00000010322	15.4862	9.86396	6.15745	9.40013	9.98114	9.03334
ENSG00000010327	4.02005	20.1549	7.50923	24.354	5.51955	17.7923
ENSG00000010361	1.70134	2.05373	2.87018	2.66644	2.99059	2.04167
ENSG00000010379	0.132815	6.04301	0.0542473	5.02544	0.129219	3.48827
ENSG00000010404	4.17896	10.8194	6.42275	9.60362	5.44991	4.15361
ENSG00000010438	0.0952485	1.46287	0.118564	0.654531	1.63248	1.03879
ENSG00000010539	1.66286	0.728658	1.89887	1.1201	1.52561	0.914936
ENSG00000010610	7.79268	41.1871	4.46625	29.8327	12.6538	29.307
ENSG00000010626	0.980277	1.1336	1.70115	0.974781	0.595702	0.831307
ENSG00000010671	1.29335	1.7381	0.801377	2.80386	0.522944	2.37322
ENSG00000010704	0.79751	1.32018	3.49385	2.48215	2.48557	1.48964
ENSG00000010803	4.51843	6.53821	6.407	5.86165	6.89868	5.62401
ENSG00000010810	1.29743	4.85027	1.98994	5.69235	1.93696	5.35726
ENSG00000010818	3.89071	4.87412	5.38998	5.10934	3.41791	6.28313
ENSG00000010932	0.347123	0.187722	38.8518	0.315809	5.51429	0.149965
ENSG00000011007	7.77457	10.6813	4.01033	7.44814	6.82789	8.91269
ENSG00000011009	18.5807	11.7745	9.38085	11.5725	10.7585	9.9376
ENSG00000011021	5.13188	3.32213	1.96509	2.99652	4.78065	5.26691
ENSG00000011028	0.947264	4.5893	9.9268	7.89247	0.879157	7.35847
ENSG00000011052	32.9503	14.0574	22.6541	22.2918	27.5121	17.8026
ENSG00000011083	0.00802113	0	0.0112326	0.0385839	0.0113512	0
ENSG00000011105	7.49047	15.1157	3.87151	12.4678	11.3654	13.9052
ENSG00000011114	4.87149	3.46529	5.91016	3.97868	3.95825	4.04188
ENSG00000011132	3.31859	2.70664	2.47382	2.76619	3.32826	1.94447
ENSG00000011143	3.54108	2.20859	2.79792	2.19597	2.05337	2.01339
ENSG00000011198	2.71306	3.91247	1.79675	2.72201	1.65726	2.30051
ENSG00000011201	0.130886	0.151715	0.756217	0.621114	0.038443	0.640087
ENSG00000011243	19.1493	8.8311	5.21925	9.05532	8.62763	7.43122
ENSG00000011258	4.51937	7.03874	5.9544	6.56754	5.65156	6.95
ENSG00000011260	9.67568	5.61614	10.314	6.51109	10.8809	7.0276
ENSG00000011275	17.0418	7.22766	6.07656	6.2104	7.28119	6.61125
ENSG00000011295	4.6904	12.5442	7.04646	11.132	8.79314	10.5345
ENSG00000011304	15.6454	7.99658	11.5059	9.1566	13.8276	10.4534
ENSG00000011332	0.201786	0.0450782	0.0171258	0.0151269	0.0311519	0.0506412
ENSG00000011347	11.7205	13.603	0.723584	10.827	1.77921	8.9696
ENSG00000011376	9.8251	4.8755	2.55436	4.56134	4.22597	4.68271
ENSG00000011405	18.1117	13.5734	13.5471	14.2973	14.4807	14.3524
ENSG00000011422	1.06287	1.28044	0.940634	1.61282	0.480874	2.07852
ENSG00000011426	15.9847	0.157459	5.36815	0.938011	1.68714	0.224623
ENSG00000011451	4.84438	2.5489	3.48694	2.55184	4.78344	2.4051
ENSG00000011454	10.9695	7.0407	7.54749	6.72837	8.67984	7.20171
ENSG00000011465	0.168606	23.3605	8.7483	23.6247	0.814747	24.6477
ENSG00000011478	4.0498	2.31411	3.17014	2.30313	7.70738	2.43483
ENSG00000011485	5.45351	5.06914	6.05089	3.85042	5.04857	2.92699
ENSG00000011523	5.18734	5.15971	7.42248	4.039	4.93055	4.63247
ENSG00000011566	7.05635	8.02001	12.5765	8.6528	11.1484	9.59347
ENSG00000011590	1.34144	0.585854	1.43041	0.401929	1.82638	0.263261
ENSG00000011600	10.6594	15.0592	20.0118	22.7088	5.30304	20.9339
ENSG00000011638	0.117035	1.1948	1.07977	1.9775	0.0779407	2.05891
ENSG00000011677	0	0	0	0.0115445	0.332842	0
ENSG00000012048	3.19736	1.20411	3.9138	0.566416	0.732428	0.496839
ENSG00000012061	4.50682	3.55549	15.0078	4.73992	6.95891	3.71514
ENSG00000012124	0.308804	0.474276	0.157494	1.78016	0.113298	0.811267
ENSG00000012171	0.796864	0.778396	0.792397	0.918946	1.09745	0.941181
ENSG00000012174	6.90252	5.57481	4.67238	4.80971	5.96308	5.70609
ENSG00000012211	1.44456	1.08391	1.61114	0.94721	1.57613	1.26841
ENSG00000012223	0.0165862	0.382109	0.193558	0.792143	0.0821525	0.604149
ENSG00000012232	5.26846	2.59012	5.91347	2.35989	3.52144	1.7529
ENSG00000012504	35.2014	43.4675	19.3283	37.2088	31.6896	43.9644
ENSG00000012660	28.2792	21.351	16.997	20.6612	48.281	18.0978
ENSG00000012779	0.594882	1.77654	12.1565	4.7952	3.30728	3.58425
ENSG00000012817	0.601094	6.47663	3.31666	8.36098	0	0
ENSG00000012822	6.42627	12.0614	5.06823	10.0642	11.6065	8.69934
ENSG00000012963	7.79453	6.06249	12.5999	6.59132	5.60634	6.95322
ENSG00000012983	4.26624	4.53267	3.92034	4.38006	4.64744	4.72474
ENSG00000013016	3.31239	14.6028	2.76614	10.5667	1.08588	6.96189
ENSG00000013275	35.8331	13.3818	17.7081	13.4957	25.1199	13.2384
ENSG00000013288	3.3111	8.48674	3.91897	5.00491	6.22899	7.7948
ENSG00000013293	0	0.0956818	0.00628772	0.05091	0	0.054229
ENSG00000013297	0.0943751	3.02937	0.991207	2.69788	0.100167	2.16387
ENSG00000013306	16.2369	6.51243	17.1122	5.45702	12.0579	6.05128
ENSG00000013364	4.86358	4.87999	11.2176	12.1193	7.28857	10.0584
ENSG00000013374	9.0444	8.77238	3.75243	9.11586	9.2575	8.70505
ENSG00000013375	10.6551	5.85924	5.66631	5.54675	2.43949	9.44841
ENSG00000013392	4.06864	2.37672	4.93576	2.83145	1.56425	2.25072
ENSG00000013441	7.73903	18.1743	6.94521	14.241	17.2667	22.9808
ENSG00000013503	9.9942	6.67543	9.94639	5.82907	5.3352	5.44843
ENSG00000013523	11.6881	8.31986	14.6927	7.02622	16.5833	7.49117
ENSG00000013561	8.80696	10.1907	11.9012	8.83775	8.5204	8.04789
ENSG00000013563	2.06805	2.21353	6.01105	3.0708	2.70939	2.53083
ENSG00000013573	4.81163	0.655663	2.2637	0.572273	0.889843	0.348332
ENSG00000013583	11.2968	25.7111	14.7499	18.5074	14.5026	15.7093
ENSG00000013588	0.00834616	0.131389	0.0954502	0.203604	0.00885837	0.44161
ENSG00000013619	1.51335	1.76136	13.6979	1.75491	0.284435	1.08796
ENSG00000013725	0.555682	0.948776	0.115897	3.20108	0.685991	1.57754
ENSG00000013810	5.02306	0.857646	4.30161	1.5164	1.81338	0.943316
ENSG00000014123	19.8064	15.8027	9.99344	13.5813	6.67649	15.5483
ENSG00000014138	3.63218	1.94137	4.63134	2.36282	2.34156	1.66033
ENSG00000014164	7.75027	3.80585	4.19944	4.37226	11.9364	3.938
ENSG00000014216	5.32299	10.5459	11.7587	12.1064	23.45	9.64772
ENSG00000014257	0.0083999	0.148361	0	0.392514	0.0594361	0.251213
ENSG00000014641	15.6164	16.2986	21.5839	15.9042	27.3488	16.5245
ENSG00000014824	10.8246	8.24697	11.1115	8.34128	5.19817	7.62596
ENSG00000014914	0.250915	1.18575	1.08116	2.33436	0.584526	1.82939
ENSG00000014919	15.8354	14.0836	13.7131	12.1508	9.48654	10.0935
ENSG00000015133	2.42345	2.66638	2.78777	2.37045	0.852379	2.51481
ENSG00000015153	1.62635	2.01623	1.79743	2.08112	1.28988	2.17534
ENSG00000015171	6.77169	6.98627	11.5365	6.8408	6.71942	14.8649
ENSG00000015285	2.10792	2.34005	0.71812	4.35066	1.22462	3.22152
ENSG00000015413	0	0.0494098	0.234268	0.415618	0.0364217	0.296039
ENSG00000015475	3.30739	4.93366	1.33494	2.92876	3.0157	3.88181
ENSG00000015479	8.59544	14.6085	4.04289	7.31298	18.0305	18.8055
ENSG00000015520	19.0522	13.3896	0.0782598	12.0048	2.5007	11.9101
ENSG00000015532	4.76948	4.10745	6.30351	3.88347	5.23753	3.07499
ENSG00000015568	5.15205	5.05639	3.64887	5.43993	6.72486	5.02256
ENSG00000015592	0.0213848	0	0	0	0.0151315	0.0573954
ENSG00000015676	9.85262	7.312	5.87532	4.77696	6.91731	4.69506
ENSG00000016082	0.0488838	0	0	0	0	0
ENSG00000016391	12.68	25.7361	51.5518	19.3862	30.5817	14.3468
ENSG00000016402	0.826534	0.251599	0.14251	0.0102339	0	0.0970712
ENSG00000016490	0	0	0	0.0144929	0	0
ENSG00000016602	0	0.0235395	0	0	0	0.0156708
ENSG00000016864	13.7606	10.5099	4.55458	10.243	8.7815	9.89531
ENSG00000017260	5.58464	6.71339	8.1732	8.12348	6.31436	8.38461
ENSG00000017427	1.33997	31.4393	1.22466	7.60482	1.68148	8.98846
ENSG00000017483	0.579116	0.128025	0.110588	0.259276	0.0745039	0.28933
ENSG00000017797	3.51201	5.62595	6.50233	5.64528	8.11508	5.90006
ENSG00000018189	2.96125	7.9532	5.02596	8.28964	5.23445	8.61799
ENSG00000018236	0	0.862816	0.0219445	0.523345	0	0.515514
ENSG00000018280	0.0690126	0.102876	0.153493	0.429608	0.149368	0.317529
ENSG00000018408	0.732632	4.48478	9.43691	6.96202	5.01216	8.04512
ENSG00000018510	12.7309	10.7584	5.85377	7.20289	7.48898	7.56482
ENSG00000018610	3.38556	3.22886	3.47933	3.19894	4.25019	4.34441
ENSG00000018625	0.0475352	0.347857	0.232333	0.630249	0	0.351652
ENSG00000018699	9.05326	6.77941	7.13406	5.87679	7.89701	7.28754
ENSG00000018869	1.11445	1.42097	0.59874	1.17764	1.92677	0.677231
ENSG00000019102	0.159871	1.64321	0.597013	2.24791	0.330663	4.88494
ENSG00000019144	0.436976	1.30615	1.37524	1.78721	1.43297	2.42458
ENSG00000019169	0.0931767	38.2742	0.0237241	49.9545	0	35.4659
ENSG00000019186	0	0	0	0	0	0
ENSG00000019485	2.3649	1.1137	0.989515	0.970555	0.884948	0.991995
ENSG00000019505	0.00974026	0.448787	0.0212179	0.499769	0.0505415	0.975975
ENSG00000019549	1.99882	6.14775	2.22474	1.83378	1.59433	1.72785
ENSG00000019582	87.8639	121.567	93.7808	249.899	78.3808	186.304
ENSG00000019991	0.932811	9.65942	0.731857	12.6328	0.363022	10.2372
ENSG00000019995	13.4818	12.7856	13.489	10.5972	12.6833	8.74299
ENSG00000020129	2.39604	1.93074	5.33315	2.40702	2.76737	2.14223
ENSG00000020181	1.42908	6.19769	8.44743	7.9523	1.98709	5.87526
ENSG00000020256	2.41114	2.02939	2.86898	1.57042	4.42725	1.63665
ENSG00000020426	4.29666	2.6802	3.58167	3.91383	4.32017	3.494
ENSG00000020577	2.8521	3.56477	0.55253	2.67686	1.30444	4.22995
ENSG00000020633	0.922764	2.31421	0.55251	4.21668	0.881594	3.61269
ENSG00000020922	3.1515	3.58796	4.3577	3.74583	4.12928	3.95874
ENSG00000021300	1.82066	0.53732	44.0466	1.02543	0.879049	0.854114
ENSG00000021355	11.2128	8.33961	17.4398	17.5539	15.8841	11.9592
ENSG00000021461	0.948303	16.1235	0.579824	13.8684	5.48142	12.1779
ENSG00000021488	1.98007	6.0301	0.202582	4.0354	8.98212	4.34717
ENSG00000021574	2.53486	2.63914	2.83773	2.3387	3.92862	2.58133
ENSG00000021645	4.85178	0.0766054	2.11344	0.109058	0.376992	0.126915
ENSG00000021762	0.478825	1.06507	0.427206	1.25133	0.630883	1.031
ENSG00000021776	8.40034	5.42618	5.07395	5.20453	5.62061	5.91962
ENSG00000021826	365.173	1038.71	0.302114	502.973	52.8129	587.096
ENSG00000021852	10.9702	267.764	23.4473	194.476	140.808	208.537
ENSG00000022267	0.742943	5.38503	2.12741	5.84394	2.456	5.46748
ENSG00000022277	9.21046	8.17465	9.10456	8.16103	13.0036	7.29891
ENSG00000022355	0	0	0	0	0	0
ENSG00000022556	0	0.0299903	0.00520856	0.0536739	0.0868484	0.145461
ENSG00000022567	0.556462	0.568714	9.6013	1.03189	0.749847	0.731065
ENSG00000022840	14.1872	14.3356	13.8096	14.0936	14.5035	14.9962
ENSG00000022976	3.92532	2.18698	3.30875	2.45062	1.97946	1.76836
ENSG00000023041	10.8162	8.81118	13.1991	8.20116	9.08294	8.93562
ENSG00000023171	0.132703	0.602337	0.0475648	0.5846	0.326966	1.00853
ENSG00000023191	5.82475	5.27807	7.48688	6.10165	7.40144	5.55995
ENSG00000023228	11.9632	20.1	13.6882	15.1161	21.9069	18.8321
ENSG00000023287	9.98809	12.5236	11.2139	12.8659	16.3635	17.6274
ENSG00000023318	21.2638	18.7557	12.9962	15.4423	19.125	17.5439
ENSG00000023330	64.0946	61.9541	12.2982	114.526	101.75	84.6575
ENSG00000023445	0.974451	2.43199	2.61986	3.85357	7.95249	7.17428
ENSG00000023516	11.0527	11.5413	10.2755	12.7213	9.68976	13.017
ENSG00000023572	7.13774	3.81531	3.87061	3.17641	7.20759	4.1274
ENSG00000023608	1.10728	1.61915	2.59983	1.84075	2.25195	2.34902
ENSG00000023697	6.89802	11.2791	5.20857	8.11025	6.89637	14.1786
ENSG00000023734	53.2215	26.2273	25.7803	22.2984	21.0554	22.1468
ENSG00000023839	43.7574	63.0359	0.635647	51.3308	77.8047	48.8995
ENSG00000023892	1.45312	2.31679	1.00131	6.4288	2.61456	2.9078
ENSG00000023902	2.4625	2.00637	2.17374	4.26918	1.59817	3.71086
ENSG00000023909	5.90046	7.84461	4.68048	9.93131	10.0928	15.7218
ENSG00000024048	16.7299	19.1868	12.5705	16.5534	18.7222	19.0955
ENSG00000024422	1.7552	3.74369	4.6393	6.18805	4.26265	6.32703
ENSG00000024526	2.8426	0.155758	2.15814	0.319756	0.527641	0
ENSG00000024862	3.5174	13.5683	3.31653	13.4105	6.23452	14.1047
ENSG00000025039	8.8052	6.15381	9.7828	4.25654	3.21838	4.96827
ENSG00000025156	4.00829	2.13212	0.997888	2.02439	1.60487	2.26904
ENSG00000025293	5.94296	5.25258	7.99781	5.74546	10.2504	6.10537
ENSG00000025423	19.928	186.245	0.383522	187.233	217.351	235.446
ENSG00000025434	16.3361	11.2173	5.13934	8.22254	9.63216	8.00189
ENSG00000025708	7.79737	6.8432	18.2335	17.6858	17.2875	17.8566
ENSG00000025770	12.0692	4.71759	14.9367	5.35548	8.43341	4.63396
ENSG00000025772	11.8456	4.1318	6.87293	3.35698	7.74719	4.40102
ENSG00000025796	19.2818	20.5206	12.7647	14.9131	14.7202	19.592
ENSG00000025800	10.6816	14.8758	10.0513	13.2211	13.3304	14.2156
ENSG00000026025	28.0817	40.1404	135.441	55.1303	15.6207	49.2156
ENSG00000026036	2.48091	2.40338	1.40668	1.45597	3.2697	1.53563
ENSG00000026103	0.488602	3.29422	0.97029	3.98358	0.539098	3.42291
ENSG00000026297	2.82255	4.13684	1.40036	5.7064	2.37379	4.3006
ENSG00000026508	1.63535	2.58736	1.09616	5.47739	0.886853	4.47624
ENSG00000026559	0	0.0348222	1.33958	0.0979342	0.201683	0.0149027
ENSG00000026652	1.15073	0.900639	5.88524	0.869424	1.2249	0.917843
ENSG00000026751	1.43929	2.55751	0.53408	3.0498	0.634254	4.73894
ENSG00000026950	1.70485	3.25714	2.3978	3.49499	1.83755	3.85629
ENSG00000027001	4.17129	4.15984	3.32001	3.88585	2.73574	4.0509
ENSG00000027075	0.998846	3.33149	1.54301	4.86638	1.73517	5.23477
ENSG00000027644	0.0241664	0.0318137	0	0.0142343	0.459248	0.0211791
ENSG00000027697	9.53874	11.3239	6.78804	21.3596	9.78762	18.0992
ENSG00000027847	3.23471	2.39893	4.6049	1.41967	3.07536	1.55134
ENSG00000027869	0.616925	1.43202	0.130898	2.23532	1.02186	3.06427
ENSG00000028116	5.62575	4.38143	4.72598	4.91465	6.26744	5.17072
ENSG00000028137	3.69416	11.5556	3.33095	15.9126	8.03366	17.4416
ENSG00000028203	6.95004	6.47681	8.12935	5.29002	4.24893	5.98033
ENSG00000028277	0.108706	0.515776	0.0888007	1.00046	0.324156	0.756194
ENSG00000028310	5.29673	3.11102	3.45408	3.72958	6.60531	3.84306
ENSG00000028528	20.8336	10.4814	8.72977	13.2919	14.2573	13.6921
ENSG00000028839	1.74391	1.56732	1.49432	2.51685	2.10688	2.621
ENSG00000029153	1.18529	0.774651	3.56692	0.953151	0.221271	0.731008
ENSG00000029363	16.8271	10.6849	7.4038	11.6534	8.04925	15.2651
ENSG00000029364	21.016	21.6345	15.4524	18.1896	21.1952	10.8019
ENSG00000029534	0.0538245	0.0375756	0.0076136	0.138982	0.0138492	0.0275164
ENSG00000029559	0	0.0524843	0.0319033	0	0.451361	0
ENSG00000029639	5.99242	4.06297	2.87834	3.40577	1.20236	3.86966
ENSG00000029725	9.93096	17.2403	17.3169	14.905	13.5159	14.8959
ENSG00000029993	6.29482	6.6748	4.26458	4.83818	3.05944	5.71899
ENSG00000030066	20.3107	7.41141	5.88541	7.9868	9.47054	7.81348
ENSG00000030110	7.65081	2.29874	15.0361	3.6436	3.27856	3.32113
ENSG00000030304	0.0124426	0.191099	0.0271045	0.302111	0	0.457989
ENSG00000030419	0.369761	1.01647	0.0698466	1.60761	0.545668	2.09405
ENSG00000030582	44.4423	30.9055	46.213	52.6089	64.3491	44.8945
ENSG00000031003	8.78191	7.11928	8.88693	7.28795	4.99676	7.53369
ENSG00000031081	1.60077	3.86796	2.30038	6.08946	2.3769	4.84106
ENSG00000031691	2.4998	1.35781	1.93533	1.17315	2.12833	1.29355
ENSG00000031698	12.6431	20.3345	22.694	15.6664	14.2604	17.0247
ENSG00000031823	5.96553	2.89179	3.63045	3.14364	3.85958	2.88044
ENSG00000032219	5.20307	9.10975	3.62793	8.81392	9.83624	11.6164
ENSG00000032389	3.00063	1.74693	3.05187	1.38303	1.40683	1.45917
ENSG00000032444	5.51982	6.30919	5.7309	5.73018	8.73227	4.38721
ENSG00000032742	3.93359	4.30201	1.89402	4.68537	2.78537	5.26383
ENSG00000033011	3.8872	3.38606	7.87195	3.81147	4.41724	2.86518
ENSG00000033030	4.31188	3.827	2.67406	3.91271	3.73113	3.84823
ENSG00000033050	10.8563	3.87865	3.91242	3.62148	7.30284	3.03904
ENSG00000033100	11.6007	6.77942	6.93994	9.99781	10.5672	7.46992
ENSG00000033122	0.104566	0.548248	0.0448835	0.404706	0.0680359	0.228574
ENSG00000033170	1.53237	2.15972	0.905472	2.53229	0.498431	2.29775
ENSG00000033178	4.88322	5.619	3.22431	5.97032	4.2575	7.63338
ENSG00000033327	4.00532	5.66024	3.24154	5.94801	5.40685	5.09378
ENSG00000033627	11.6176	6.59446	5.67587	8.70251	7.43211	7.66744
ENSG00000033800	7.70373	6.74667	6.51316	5.35002	4.80577	5.98521
ENSG00000033867	3.98322	2.5905	2.13546	3.87864	3.04004	4.61753
ENSG00000034053	0.8204	0.791444	0.131641	1.1381	0.0435374	0.491495
ENSG00000034152	5.82358	6.68487	6.27124	6.41065	4.50604	10.2237
ENSG00000034239	0	0.139777	0.0226575	0.0833871	0	0.237285
ENSG00000034510	106.124	44.442	707.983	144.34	92.1495	135.642
ENSG00000034533	1.37204	3.06221	3.07516	3.74311	1.1999	1.24522
ENSG00000034677	10.5732	13.3239	10.1382	16.1648	30.2439	23.838
ENSG00000034693	12.2686	8.83711	2.82646	9.7161	4.78916	8.25331
ENSG00000034713	5.2007	11.3305	11.0165	11.8862	7.89374	12.8901
ENSG00000034971	0.0251697	0	0	0	0	0
ENSG00000035115	0.529968	1.3154	10.3151	1.89246	0.852668	1.71268
ENSG00000035141	29.5884	13.3657	20.6975	9.92907	12.3558	8.62946
ENSG00000035403	9.9455	6.57225	11.7909	7.65673	5.36991	8.3983
ENSG00000035499	4.01624	0.149234	4.19444	0.324319	1.04113	0.198697
ENSG00000035664	0.153955	0.518605	0.0978332	0.648996	2.15857	0.744066
ENSG00000035681	5.98439	3.22457	3.58151	2.94834	2.94289	2.61981
ENSG00000035687	15.9963	7.12693	30.8546	8.47042	11.3119	9.73961
ENSG00000035720	0.170252	0.326851	0.0496701	0.701963	0.045175	0.848609
ENSG00000035862	3.95163	22.063	6.28971	12.5506	1.71217	21.7536
ENSG00000035928	17.1255	10.1602	15.5771	9.17117	14.4618	10.7448
ENSG00000036054	6.12683	8.82374	5.71675	9.6241	6.97302	10.9122
ENSG00000036257	7.07936	5.97595	4.43566	5.41703	5.86593	5.72099
ENSG00000036448	0.0398989	0.953651	0.139684	0.325587	0.0105869	0.520132
ENSG00000036473	38.5329	175.508	0.161744	136.381	187.416	100.657
ENSG00000036530	0.0659071	0.242936	0.04395	0.207041	0.122582	0.0808641
ENSG00000036549	4.5023	6.82178	3.747	5.2689	4.36847	7.64864
ENSG00000036565	0	0	0	0	0.0127476	0.0276303
ENSG00000036672	0.520007	0.882094	0.503586	2.21871	1.87269	2.94607
ENSG00000036828	0.0102684	0.259092	0	0.048386	0.0685057	0.157485
ENSG00000037042	9.11014	3.79555	6.58344	3.89415	4.0547	2.96198
ENSG00000037241	6.23323	3.43896	6.08762	3.49323	2.2909	2.27392
ENSG00000037280	0.911157	3.1899	2.21204	3.66382	2.05521	2.8406
ENSG00000037474	14.4983	11.3572	7.26788	9.37617	19.3995	11.9591
ENSG00000037637	3.38722	4.44058	4.1468	3.91172	3.44807	4.00139
ENSG00000037749	2.39022	2.80011	0.622199	0.701719	1.49306	2.07199
ENSG00000037757	5.0956	5.16521	5.81327	6.12781	6.02848	5.3689
ENSG00000037897	5.14	1.7646	3.61936	1.49596	3.92698	1.70028
ENSG00000037965	0	0	0	0	0.118737	0
ENSG00000038002	2.50825	4.18595	6.66237	6.15256	2.23595	5.7753
ENSG00000038210	6.4273	21.6834	8.57337	21.6119	17.262	26.3677
ENSG00000038219	4.24159	5.56798	4.36107	6.09808	6.14711	7.30561
ENSG00000038274	6.84526	10.4923	4.4157	11.2772	8.07665	11.5152
ENSG00000038295	0	0.179785	0.133328	0.366811	0.0894552	0.287249
ENSG00000038358	11.6594	9.04777	4.21873	6.8614	6.55639	6.29603
ENSG00000038382	7.99009	6.24861	5.18027	6.57218	11.5878	7.03459
ENSG00000038427	0.179298	0.986608	11.6286	2.30102	0.596531	2.38017
ENSG00000038532	2.30296	3.62929	2.72796	3.724	3.43111	3.66702
ENSG00000038945	5.54101	6.02081	6.28842	9.48048	1.86944	8.47736
ENSG00000039068	29.0599	59.3351	38.5243	33.0701	37.1181	53.2652
ENSG00000039123	12.8959	12.035	10.0474	9.67315	16.1774	11.4678
ENSG00000039139	0.125063	0.121485	0.0079834	0.405466	1.69572	1.22461
ENSG00000039319	6.38436	8.20069	6.12819	9.31928	4.53594	11.7828
ENSG00000039523	3.65607	5.77998	5.39476	6.20814	4.0073	5.59117
ENSG00000039537	9.2567	248.93	0.398965	225.637	114.763	268.878
ENSG00000039560	10.1465	7.77243	7.2248	6.3003	6.62024	6.98844
ENSG00000039600	0.0101472	0.0233768	0.0142099	0.0348647	0.0287197	0
ENSG00000039650	8.51454	3.17444	7.2219	4.61086	7.86629	3.89833
ENSG00000039987	0.20632	0.0919963	0.149123	0.0640294	0	0.0714514
ENSG00000040199	1.53367	1.89002	1.31074	1.80753	0.887704	1.66034
ENSG00000040275	4.03671	0.526557	3.1147	0.89172	0.81385	0.774583
ENSG00000040341	4.79892	5.69314	4.61907	4.80673	8.37827	4.8116
ENSG00000040487	3.16017	4.05805	4.505	4.21707	4.38864	3.72047
ENSG00000040531	3.92321	5.9777	6.077	5.52725	6.99681	5.14261
ENSG00000040608	0.195144	0.639924	0.871526	0.906076	2.06	0.825061
ENSG00000040633	7.20741	5.70483	13.0558	6.20949	6.23263	4.96889
ENSG00000040731	1.39536	0	0	0	0	0
ENSG00000040933	1.88163	1.87054	1.56466	2.73471	2.4587	2.70967
ENSG00000041353	0.113738	0.53497	0.0376068	0.683887	0.231376	1.75164
ENSG00000041357	10.5144	6.03491	8.18046	6.17532	4.44214	6.04567
ENSG00000041515	0.0554568	2.33492	0.00714119	0.791088	1.04189	1.5984
ENSG00000041802	6.6304	6.97225	7.88941	8.09784	7.1537	8.62168
ENSG00000041880	2.79673	6.93724	4.88508	6.68726	3.65142	7.20414
ENSG00000041982	1.7636	3.90435	3.32365	2.17014	1.91645	0.818443
ENSG00000041988	1.81207	1.09596	2.12778	1.4384	1.16896	1.64493
ENSG00000042062	0.512867	5.86039	17.5325	4.41448	0.41059	5.20935
ENSG00000042088	4.00172	1.7678	3.49041	2.13774	2.22121	1.70024
ENSG00000042286	3.6524	3.27618	4.35113	2.73375	5.37257	3.23998
ENSG00000042304	0.0101035	0.0387936	0.00471624	0	0	0
ENSG00000042317	1.00968	1.17287	1.79433	1.40175	0.971912	1.20265
ENSG00000042429	1.16201	1.55508	1.56193	1.4994	2.06454	1.75776
ENSG00000042445	22.5923	38.5005	11.174	33.3767	8.22007	3.41233
ENSG00000042493	5.59317	0.9441	9.28934	5.31967	1.96925	4.93138
ENSG00000042753	10.3657	9.74578	23.735	11.9879	17.3456	8.74927
ENSG00000042781	1.3672	2.70522	0.169972	0.921809	0.655063	1.66087
ENSG00000042813	0.0266521	0	0	0.0274723	0	0
ENSG00000042832	0.0632784	0.0947566	0.115198	0.647909	0.190292	0.373637
ENSG00000042980	0.0979297	0.749134	0.668111	1.8998	0.135921	1.2593
ENSG00000043039	0	0	0.0673804	0.0661287	0	0
ENSG00000043093	3.90435	6.92249	5.6679	7.76559	4.89128	9.97251
ENSG00000043143	3.74602	4.04458	4.21965	4.0702	4.4282	3.77907
ENSG00000043355	3.11773	0	2.70702	0	6.18145	0
ENSG00000043462	2.39943	6.52651	1.55466	7.75475	2.0229	8.01609
ENSG00000043514	1.80606	2.62065	1.87737	2.40438	1.75477	1.48004
ENSG00000043591	0.0185178	0.511929	0.0518638	0.729571	0.0960873	0.804673
ENSG00000044012	0	0.724876	0	0.405412	0	1.62866
ENSG00000044090	16.2305	5.56509	7.43751	6.87217	20.1879	5.32686
ENSG00000044115	24.2198	18.1119	23.5832	19.971	28.0233	19.3893
ENSG00000044446	16.4947	17.2634	5.7613	10.6956	16.8536	12.2913
ENSG00000044459	3.13562	5.92079	1.3032	4.42105	2.41242	4.90666
ENSG00000044524	0.248034	5.68172	3.07927	6.61469	0.347274	8.5186
ENSG00000044574	200.329	79.9088	104.514	92.2356	295.736	108.373
ENSG00000046604	5.04414	5.54484	15.1978	6.92467	3.82882	10.258
ENSG00000046647	3.98123	2.47707	4.9648	2.59604	3.07407	2.74097
ENSG00000046651	6.11188	4.82682	4.2755	6.34559	7.55067	7.73913
ENSG00000046653	0.971287	1.05328	0.822765	0.827384	0.641154	0.780513
ENSG00000046774	0	0	0	0	7.07216	0
ENSG00000046889	0.353435	2.00755	1.2844	2.42673	2.45743	2.88274
ENSG00000047056	5.58836	4.57093	4.32667	4.46951	3.10273	4.18634
ENSG00000047188	8.37536	6.33162	4.63766	7.87675	5.64744	8.1755
ENSG00000047230	9.34853	5.33575	10.6283	4.30473	9.48466	4.26452
ENSG00000047249	3.37331	2.56654	3.49811	3.17636	3.04542	3.99558
ENSG00000047315	14.0889	11.3578	12.2338	13.0387	18.5655	14.0055
ENSG00000047346	6.87257	12.3241	7.03985	11.5846	8.02498	10.6172
ENSG00000047365	3.57932	6.1219	4.03612	6.22799	0.828178	7.73445
ENSG00000047410	42.4874	12.446	16.4808	13.8849	29.9947	14.5759
ENSG00000047457	48.4551	362.327	1.78244	306.871	259.237	539.136
ENSG00000047578	1.85931	1.99866	2.46679	2.52569	1.82887	2.03724
ENSG00000047579	3.58901	1.68379	2.9197	2.65663	2.78449	2.5752
ENSG00000047597	2.80941	0.42058	2.60705	0.353126	0.38753	0.233325
ENSG00000047617	0.152032	0.108101	0.186618	0.201209	0.490064	0.202942
ENSG00000047621	5.87607	2.07548	3.98121	3.30287	2.48761	2.8764
ENSG00000047634	22.4287	11.0658	0.831462	9.27264	12.6807	11.6102
ENSG00000047644	3.72556	3.41033	6.33921	4.15746	3.26145	4.55965
ENSG00000047648	0.0759357	0.579699	0.656798	0.454288	0.233886	0.455567
ENSG00000047662	0.188816	0.0694349	0.0794482	0.0840639	0.0376345	0.0693365
ENSG00000047849	15.2227	8.63735	7.20544	12.0586	10.3919	10.7633
ENSG00000047932	13.6264	10.4494	5.24699	5.04144	5.8319	11.8761
ENSG00000047936	0.0963909	0.041314	0.00627831	0.113991	0.0158615	0.0653213
ENSG00000048028	3.14394	5.68936	5.89041	4.70181	5.66062	5.00597
ENSG00000048052	0.118261	0.560966	0.155351	0.861571	0.154029	1.17973
ENSG00000048140	4.04212	3.16369	8.73901	3.42046	4.07156	2.81739
ENSG00000048162	5.54401	2.18303	4.10733	1.93659	3.23057	1.97233
ENSG00000048342	0.91687	2.36118	1.1867	2.3293	2.00198	2.99701
ENSG00000048392	5.01204	5.98172	4.43025	7.41623	10.363	8.70429
ENSG00000048405	5.97045	5.46261	2.63938	6.40486	5.17102	6.37334
ENSG00000048462	0	0.241922	0.117644	0.259783	0.289786	0.797213
ENSG00000048471	2.28508	3.27014	3.83444	3.60969	5.9337	3.02168
ENSG00000048540	0.176653	0.223898	0	0.249857	0.298534	0.562899
ENSG00000048544	15.6824	14.895	14.3214	11.7918	22.1932	11.4051
ENSG00000048545	0	0.0346607	0.14046	0.0620327	0	0.0230744
ENSG00000048649	1.92215	3.02087	2.97272	3.52129	3.74457	3.84881
ENSG00000048707	4.59254	13.7462	7.17781	12.0992	8.68918	13.2377
ENSG00000048740	0.909555	2.48098	0.65895	2.98074	0.401814	3.35332
ENSG00000048828	28.3908	29.6638	31.8524	26.8976	39.5133	25.0628
ENSG00000048991	7.21317	2.58552	6.34068	2.65382	3.12072	2.7289
ENSG00000049089	0.592999	0.346344	9.53622	1.02735	0.212752	0.774969
ENSG00000049130	5.73296	1.19434	1.70635	1.50952	0.53016	2.01531
ENSG00000049167	2.28534	1.37022	2.77031	1.71927	1.16648	1.517
ENSG00000049192	1.69177	0.132598	0.255238	0.457675	0.302538	0.70619
ENSG00000049239	17.2495	46.9991	12.3575	53.467	48.7068	28.3502
ENSG00000049245	12.8888	21.0986	17.4118	23.7646	11.0973	22.3995
ENSG00000049246	0.424006	4.5952	4.54513	9.65853	9.15749	8.8039
ENSG00000049247	0.068829	0.0453047	0.0275391	0.21622	0.0417446	0.180962
ENSG00000049249	0.166897	0.102531	0.0129844	0.302013	0.118093	0.102386
ENSG00000049283	0.151748	0.0990516	0.212505	0.0312836	0.134218	0.116366
ENSG00000049323	2.5422	10.1634	6.04333	7.82993	3.397	10.7939
ENSG00000049449	12.6079	21.1689	22.1802	12.4665	20.4916	16.6269
ENSG00000049540	0.104984	2.47234	1.05048	4.41738	0.300948	4.16978
ENSG00000049541	7.00115	4.81976	8.96772	5.53902	4.29449	5.48479
ENSG00000049618	4.46833	3.49127	2.52995	3.28887	2.53918	4.24804
ENSG00000049656	8.41979	6.91332	12.078	8.49342	10.9614	7.18775
ENSG00000049759	6.03122	1.97719	7.97504	2.68862	18.6023	3.45518
ENSG00000049768	0.904803	0.797	0.0993778	0.411462	0.668466	1.10198
ENSG00000049769	1.56143	0.978693	1.78473	1.15419	2.57995	1.21678
ENSG00000049860	11.6673	13.9638	14.3837	13.9764	18.4981	17.5314
ENSG00000049883	2.22546	2.69465	1.9596	1.92986	1.61275	1.53602
ENSG00000050030	0	0.0592485	0.0263186	0.0469013	0.0104986	0.0523379
ENSG00000050130	3.90667	4.24668	6.99207	3.92814	3.73537	4.31517
ENSG00000050165	0.978162	5.89162	12.0601	7.89866	2.02959	4.84756
ENSG00000050327	6.92853	7.12202	10.2013	5.33317	6.74227	5.59391
ENSG00000050344	7.42712	12.54	6.98802	9.74618	8.4284	9.85888
ENSG00000050393	2.81441	3.08113	4.97269	2.7252	4.04456	3.10798
ENSG00000050405	3.02474	6.40957	13.2162	6.90806	5.46404	6.41759
ENSG00000050426	8.21254	6.85141	10.529	5.20415	6.05686	4.6477
ENSG00000050438	0.0666021	0.0691968	0.104241	0.21807	0.0651453	0.121674
ENSG00000050555	0.271322	3.70764	2.19961	8.00927	0.817154	6.29158
ENSG00000050628	0.0675007	0.070048	0.355965	0.198078	0.100688	0.10912
ENSG00000050730	0.0654314	0.107671	0	0.0706566	0	0.258044
ENSG00000050748	6.55055	4.0291	6.80215	3.58655	4.41658	3.88466
ENSG00000050767	0.0981992	0.22982	0.0785806	0.430592	0	0.121919
ENSG00000050820	3.39621	3.48032	2.63504	3.76311	2.81311	3.10755
ENSG00000051009	15.6917	12.5183	6.63742	13.0061	9.61395	11.3943
ENSG00000051108	7.40969	20.8977	11.4942	18.3859	25.932	23.0372
ENSG00000051128	2.48048	1.73884	6.28902	1.98746	1.06328	1.54696
ENSG00000051180	1.70554	0.612685	2.8229	0.429077	0.359996	0.195072
ENSG00000051341	3.75251	0.0748106	2.93661	0.365621	0.501082	0.172395
ENSG00000051382	3.40991	6.15016	7.1795	5.69467	5.92085	6.88462
ENSG00000051523	10.9639	5.26919	19.3401	11.8456	7.44603	9.16378
ENSG00000051596	11.4853	5.718	9.2798	3.70792	7.21015	5.78812
ENSG00000051620	5.46031	8.31048	2.55915	5.19539	3.18859	6.34791
ENSG00000051825	4.75467	4.40982	4.87129	4.59211	4.56879	3.861
ENSG00000052126	5.12269	5.84961	6.11261	4.63324	7.67015	6.00263
ENSG00000052344	0.315934	2.90238	12.377	3.67469	0.157312	5.16843
ENSG00000052723	5.47075	8.74184	5.36962	6.41008	5.81813	7.8588
ENSG00000052749	6.41936	1.70926	2.92422	1.49833	3.43917	1.97601
ENSG00000052795	3.41416	19.9642	5.11771	11.7341	5.46907	22.1874
ENSG00000052802	75.5018	65.9619	4.6389	47.6697	101.099	74.255
ENSG00000052841	24.4507	13.2023	4.52545	12.005	13.6711	12.0419
ENSG00000052850	0.192814	0.159818	0.0228583	0.0378568	0.0866234	0.042245
ENSG00000053108	0.0549181	0	0.00488293	0.0107825	0.0555128	0
ENSG00000053254	15.0071	14.8117	5.78178	11.2603	26.0713	14.497
ENSG00000053328	1.90597	0.914778	4.6987	0.682162	0.140482	0.639437
ENSG00000053371	8.09821	19.6815	11.0682	16.2939	16.8196	21.0185
ENSG00000053372	7.00796	8.62588	6.18715	7.83041	7.79792	7.89586
ENSG00000053438	5.56605	4.0611	1.50584	2.58021	4.84586	2.53459
ENSG00000053501	2.80346	2.33643	4.4771	2.21024	2.81918	1.93316
ENSG00000053524	0.0693525	0.04734	0.0327729	0.0729576	0.0278683	0.0709095
ENSG00000053702	6.04395	5.27815	5.02668	4.54186	2.83624	3.28574
ENSG00000053747	0.580694	0.781298	2.80697	1.00915	1.2836	1.00836
ENSG00000053770	2.94948	3.79952	2.92766	5.19938	2.87762	4.77842
ENSG00000053900	2.36873	3.29515	5.51757	3.19737	3.4253	4.14103
ENSG00000053918	0.526688	1.13735	1.81895	1.31166	0.437122	1.05071
ENSG00000054116	4.39885	6.26519	7.44428	6.42305	7.80786	4.07388
ENSG00000054118	44.4573	34.751	19.1104	36.5806	37.8191	40.4901
ENSG00000054148	16.7037	11.2751	47.5478	14.2636	15.5373	11.4435
ENSG00000054179	1.43799	0.267079	0.387137	0.79053	1.06955	0.348763
ENSG00000054219	0.806659	1.71848	0.386821	3.48549	0.835628	2.40063
ENSG00000054267	7.43348	5.45189	4.38006	5.04477	6.77223	6.03688
ENSG00000054277	3.06144	2.86045	5.964	2.93746	4.1916	3.54688
ENSG00000054282	7.10107	5.12784	5.50807	4.71146	2.26645	4.39994
ENSG00000054356	0	0.0229183	0	0	0.0211174	0
ENSG00000054392	3.79998	1.59243	2.99802	1.69469	2.04896	1.54544
ENSG00000054523	6.58998	11.3209	4.24474	7.44122	8.87725	9.02624
ENSG00000054598	0.865717	0.351348	0.372703	0.752109	0.622087	0.605389
ENSG00000054611	5.36761	3.58251	8.27763	6.08379	4.97493	5.07142
ENSG00000054654	3.89265	8.04494	7.46581	9.32746	4.33152	11.7421
ENSG00000054690	2.54461	0.705115	0.16111	0.94199	2.67946	1.08364
ENSG00000054793	16.4458	7.64871	18.8999	10.0136	30.7017	9.31679
ENSG00000054796	0	0	0	0	0.0266969	0
ENSG00000054803	0.489178	1.1359	0.179414	0.096044	0.0906538	0.339394
ENSG00000054938	0.0393214	0.129411	0.818107	0.741148	0.103343	0.620294
ENSG00000054965	6.04652	10.2468	22.684	8.86557	8.86331	9.06109
ENSG00000054967	1.22844	1.18935	0.735962	2.32001	0.323247	1.67042
ENSG00000054983	3.03183	3.63796	7.22673	3.54624	0.565984	5.19199
ENSG00000055044	23.5037	8.08374	10.2113	9.8309	16.7932	12.8535
ENSG00000055070	3.68753	4.94559	6.48351	3.47725	4.15797	4.52894
ENSG00000055118	0.308639	0.101248	1.40434	0.045301	0.0848105	0.0689347
ENSG00000055130	23.1	18.5852	6.24176	14.5369	18.0941	18.262
ENSG00000055147	3.0656	3.5798	5.90744	3.2404	3.0014	3.76461
ENSG00000055163	3.0715	16.9243	15.1472	8.17529	3.38998	13.8516
ENSG00000055208	9.7956	24.5987	5.3289	10.4504	6.65128	15.7648
ENSG00000055211	8.43733	16.4205	11.8009	14.5326	6.81189	17.7657
ENSG00000055332	13.5374	10.6372	7.64629	8.26502	7.50914	11.2023
ENSG00000055483	11.1154	5.8692	4.40973	5.17346	13.4471	7.04242
ENSG00000055609	16.5247	18.8713	10.2214	16.1916	17.879	18.3262
ENSG00000055732	1.54486	0.106178	9.0036	0.277735	0.0564432	0.269148
ENSG00000055813	0.0309575	0.0747153	0.565643	0.188422	0.450616	0.108523
ENSG00000055917	26.8799	24.4267	23.4196	21.1161	24.8073	21.4157
ENSG00000055950	5.86027	2.77812	14.0895	5.01945	5.72645	4.51278
ENSG00000055955	73.8688	409.645	16.8442	430.041	274.137	519.375
ENSG00000055957	164.597	489.214	9.26605	383.905	411.096	450.653
ENSG00000056050	4.85635	6.96891	4.65976	6.65754	3.12387	6.78977
ENSG00000056097	21.7044	11.0744	10.8807	12.49	14.5486	9.89759
ENSG00000056277	3.19222	1.36577	1.70652	1.12293	1.59726	1.22978
ENSG00000056291	0	0	0	0	0.116209	0.0228984
ENSG00000056487	0	0.00470136	0	0	0	0
ENSG00000056558	3.97865	3.44325	2.9751	5.85093	4.62183	4.60684
ENSG00000056586	8.49173	7.21798	8.99011	7.52613	10.1348	7.95871
ENSG00000056736	26.2127	15.4465	37.7576	23.6454	11.3369	8.09014
ENSG00000056972	1.37056	2.96761	0.449093	1.61034	0.330868	1.94126
ENSG00000056998	2.97763	3.04879	0.229407	3.36393	5.06613	4.88446
ENSG00000057019	8.1835	4.35908	2.95888	4.59417	3.23843	4.34811
ENSG00000057149	0	0	0	0	0	0
ENSG00000057252	10.2671	7.59476	4.22931	9.50848	15.1949	10.6338
ENSG00000057294	9.29152	7.53842	5.78685	9.62557	8.20575	6.75695
ENSG00000057468	0.150977	0.0331254	0.407748	0.059285	0.0915673	0.0578874
ENSG00000057593	21.1557	37.4523	3.49178	27.9595	76.2028	26.1119
ENSG00000057608	64.2978	44.3696	68.6087	45.7056	42.4525	54.1914
ENSG00000057657	0.843051	1.4429	1.21146	2.38547	1.61413	3.51552
ENSG00000057663	5.77048	5.31851	3.48295	4.36555	2.78963	6.47156
ENSG00000057704	0.873086	1.90553	1.33495	2.68593	1.40004	3.31648
ENSG00000057757	14.1785	14.9216	9.01763	12.7659	10.4201	13.2943
ENSG00000057935	3.59199	2.31356	2.97893	1.53271	1.66772	1.94268
ENSG00000058056	2.56644	4.19163	4.35175	4.22407	2.79039	3.86569
ENSG00000058063	4.75304	8.90584	14.6119	8.95904	8.17078	6.74334
ENSG00000058085	0.0699786	0.190151	0.0854329	0.610349	0.335182	1.79149
ENSG00000058091	2.8085	10.1293	6.35907	6.63011	5.11109	8.23564
ENSG00000058262	19.6125	39.2085	39.5007	34.8387	35.6977	37.221
ENSG00000058272	6.61497	5.32007	6.48842	5.77288	5.2362	6.59144
ENSG00000058335	0.0319254	0.0408605	0.00662335	0.082879	0.0200798	0.0326421
ENSG00000058404	0.0237424	1.96578	0.989391	0.925526	0.0855256	0.748125
ENSG00000058453	1.32807	1.72873	1.25655	2.17994	1.8682	0.998628
ENSG00000058600	3.04395	3.43218	3.98717	3.62995	4.33133	3.44155
ENSG00000058668	15.6466	6.64418	4.11993	12.9667	34.6533	8.23234
ENSG00000058673	5.57016	4.47401	4.22903	1.69826	4.87604	5.1451
ENSG00000058729	2.92546	2.86102	3.4543	3.24644	2.80379	3.09259
ENSG00000058799	7.14785	9.62045	6.64933	9.06448	10.6927	10.5062
ENSG00000058804	7.82951	3.98198	6.3394	3.90266	3.27596	3.59764
ENSG00000058866	0.214956	0.623326	0.0524165	1.28533	0.245175	0.782359
ENSG00000059122	1.83655	3.53065	3.56	4.22886	4.06429	2.75251
ENSG00000059145	0.923523	1.37869	1.23734	1.45335	1.7193	1.32989
ENSG00000059377	1.42587	3.71241	1.57248	5.10217	1.07725	4.20812
ENSG00000059378	7.84552	4.45403	5.31285	5.27578	8.84249	6.12797
ENSG00000059573	54.8372	9.39389	15.1573	8.25836	16.5504	8.72079
ENSG00000059588	27.6199	3.16124	9.08566	5.90777	12.2178	4.78921
ENSG00000059691	1.42297	2.00603	1.01103	1.91451	1.26335	1.55982
ENSG00000059728	3.98736	1.27335	3.12715	2.77053	2.94695	3.07892
ENSG00000059758	6.57397	6.21331	7.01629	6.90936	6.01056	9.57492
ENSG00000059769	7.85862	14.4648	3.21696	8.61054	4.96311	14.1101
ENSG00000059804	0.995034	3.63612	2.36242	13.1135	7.31178	10.5552
ENSG00000059915	1.59766	0.644381	0.539553	0.584265	0.365684	0.473013
ENSG00000060069	3.50545	1.86757	2.31036	2.70918	3.41474	2.3348
ENSG00000060138	7.18119	1.82198	1.30992	2.10266	2.08114	3.56664
ENSG00000060140	0.0257161	0.0473953	0.0576197	0.0777553	0	0.181425
ENSG00000060237	23.2379	12.2285	10.1951	12.6523	15.6848	12.0176
ENSG00000060339	15.7909	7.69134	6.68052	8.20884	9.2299	9.09351
ENSG00000060491	15.0411	11.119	5.10148	11.6795	25.0859	9.63281
ENSG00000060558	0.86266	0.879827	0.975249	1.74136	0.572252	1.3127
ENSG00000060566	16.4333	22.6132	0.116645	8.32377	55.6966	17.4275
ENSG00000060642	2.62438	9.75673	5.23559	6.83441	4.62029	7.29121
ENSG00000060656	2.2349	2.88603	5.49913	2.69849	2.02147	2.55454
ENSG00000060688	6.00777	3.34515	6.28233	4.57745	4.52068	3.66749
ENSG00000060709	0.00364793	0.0532254	0.0323537	0.00752038	0	0.0419606
ENSG00000060718	0.00387425	0	2.82845	0	0	0.0326801
ENSG00000060749	6.32901	3.92837	10.8685	4.54127	8.24316	5.12467
ENSG00000060762	29.7417	56.9455	28.9682	42.0658	16.523	63.1366
ENSG00000060971	21.2633	70.4301	1.88563	30.0001	25.2793	45.435
ENSG00000060982	2.82514	0.558166	1.86539	0.616639	0.952416	0.883084
ENSG00000061273	3.1361	2.86597	5.81423	4.32477	4.85227	3.21285
ENSG00000061337	0.395046	0.483489	3.30776	1.17919	0.738125	1.09814
ENSG00000061455	0.0395527	0.242988	0.174079	0.183788	0.0426465	0.112656
ENSG00000061492	0	0	0	0	0	0
ENSG00000061656	1.62739	0.74862	0.242208	0.626687	1.90249	0.844019
ENSG00000061676	8.94283	6.68727	6.75811	6.08624	6.92979	6.01098
ENSG00000061794	53.107	29.9443	35.4071	25.1937	36.8975	29.0285
ENSG00000061918	0.775538	2.51295	2.60916	2.93765	1.25143	5.11307
ENSG00000061936	6.70121	3.44844	2.22729	3.70779	3.7835	3.49939
ENSG00000061938	1.72513	3.24608	1.52572	3.21902	4.29982	2.23217
ENSG00000061987	10.135	11.0505	6.5714	9.10582	7.77816	9.87466
ENSG00000062038	0	0.0173489	0.0975481	0.0659802	0	0.0173243
ENSG00000062096	0	0.613587	0.0298381	0.0329443	0	0.710753
ENSG00000062194	11.7983	11.8686	12.8056	12.2212	14.8058	15.5575
ENSG00000062282	10.1942	26.0342	0.424279	16.8549	16.0343	12.9867
ENSG00000062370	3.44153	1.69395	4.2512	1.76114	2.11134	1.18619
ENSG00000062485	19.4534	13.4052	26.595	13.0921	13.5313	11.3907
ENSG00000062524	1.26654	2.26295	0.00942167	3.71022	0.235648	1.53229
ENSG00000062582	4.32678	8.54985	12.9803	4.58497	12.0936	3.69004
ENSG00000062598	7.67619	5.18556	3.6704	5.00349	5.60149	3.6923
ENSG00000062650	18.2195	10.3465	9.54422	11.8973	12.5711	13.3287
ENSG00000062716	37.9224	26.8162	36.4165	45.2811	69.1541	56.7548
ENSG00000062725	5.27456	4.8392	4.02364	4.86219	6.30862	5.42032
ENSG00000062822	11.6081	1.54648	5.25693	2.17396	4.3254	1.36905
ENSG00000063015	1.7421	0.317266	36.3626	1.25866	0.862388	0.322097
ENSG00000063046	101.304	111.145	159.211	39.7189	71.7519	37.2434
ENSG00000063127	0.636107	4.17841	4.17073	4.90921	5.44964	3.5121
ENSG00000063169	2.16289	1.59608	0.897926	2.02472	4.04681	1.70535
ENSG00000063176	5.3514	4.6181	9.28883	4.83337	7.70996	3.17325
ENSG00000063177	81.2279	29.4245	178.693	41.9313	72.6153	33.1239
ENSG00000063180	0.52619	0.808149	1.91743	0.828154	0.408353	0.611762
ENSG00000063241	10.1356	10.9096	17.5784	8.21961	20.0085	8.61482
ENSG00000063244	25.305	11.3446	20.572	11.6104	19.8525	10.8822
ENSG00000063245	8.25837	8.18808	7.5783	6.60035	9.39085	4.63482
ENSG00000063322	8.35288	9.59161	10.3789	7.7248	13.3153	8.85967
ENSG00000063438	0.0252298	0.0422718	0.0428258	0.0819589	0.0551793	0.109048
ENSG00000063515	0	0	0	0	0	0
ENSG00000063587	7.51797	10.8028	7.77745	7.68546	8.18584	7.04803
ENSG00000063601	6.36124	4.42726	5.59815	4.84598	4.23702	4.60894
ENSG00000063660	1.25673	3.96406	10.6224	5.37475	8.26894	5.38017
ENSG00000063761	2.07006	1.29207	1.87073	1.37926	1.4952	1.34103
ENSG00000063854	3.99071	17.4096	6.7992	14.5664	12.0207	13.2444
ENSG00000063978	2.88985	2.58936	4.21988	2.54349	2.64642	3.65564
ENSG00000064012	5.88391	4.46239	3.27999	5.0224	4.38355	3.99368
ENSG00000064042	0.572313	3.9293	1.1897	2.55579	0.892514	4.31163
ENSG00000064102	7.28107	4.49569	7.06291	3.4948	2.30217	2.92291
ENSG00000064115	8.42019	21.0435	43.635	22.0305	9.92888	24.1813
ENSG00000064195	0	0.0298861	0	0	0.045896	0
ENSG00000064199	0.125184	0.181872	0.628573	0.260398	0.148428	0.358039
ENSG00000064201	0.343572	0.784382	0.0823558	1.63991	0.177401	0.598135
ENSG00000064205	0.0176776	0.13032	0	0.485908	0.130086	0.797082
ENSG00000064218	0	0	0.551012	0.0101395	0	0
ENSG00000064225	3.50359	11.5663	1.67075	11.043	2.10058	10.3774
ENSG00000064270	0.0862315	0.250162	0.0559059	0.17777	0.0203386	0.191029
ENSG00000064300	0.42859	12.7153	2.76126	21.1529	0.696602	13.2049
ENSG00000064309	0.775854	2.88586	4.16294	1.36314	2.692	1.89825
ENSG00000064313	9.2154	6.32073	6.19764	6.59144	11.1494	6.11376
ENSG00000064393	17.424	25.1012	1.87337	17.1301	18.6402	18.986
ENSG00000064419	18.3787	14.6745	15.2137	12.8003	13.6653	15.1909
ENSG00000064489	1.17646	0	0.170283	0.012534	1.34223	0.797251
ENSG00000064490	4.35511	1.70732	6.6604	2.45609	3.19609	2.39549
ENSG00000064545	7.09032	4.91313	6.56931	4.82439	6.0386	3.63024
ENSG00000064547	1.53648	0.698863	9.67691	1.3401	0.359606	1.24167
ENSG00000064601	18.2419	12.8353	22.7409	17.4042	42.4594	15.5936
ENSG00000064607	16.9303	11.6837	12.783	12.1959	9.32057	9.03583
ENSG00000064651	6.75748	3.67254	5.56404	4.86604	7.66062	8.09448
ENSG00000064652	1.80569	3.36753	5.30737	3.92022	3.22225	4.25291
ENSG00000064655	0.0438069	1.28581	0.299915	0.468274	0.0688821	0.776367
ENSG00000064666	5.72519	7.33866	12.0386	7.84858	3.83566	7.37272
ENSG00000064687	3.75486	1.71003	0.921566	2.74516	0.789317	1.68501
ENSG00000064692	4.27938	1.59881	0.0336672	2.50457	0.251767	0.951293
ENSG00000064703	1.7467	1.20428	1.96667	1.97839	1.37878	1.63335
ENSG00000064726	5.79128	8.79722	13.8341	11.3846	8.44667	11.117
ENSG00000064763	2.46695	2.21434	2.07827	2.232	1.59358	1.81189
ENSG00000064787	0.114018	0.0297364	0.180757	0.0886994	0.748925	0.112178
ENSG00000064835	0.303047	0.0861916	0	0	0	0
ENSG00000064886	0.208439	0.500717	0.25946	0.558251	0.105888	0.532795
ENSG00000064932	6.68961	4.91465	4.48611	7.75113	9.82043	6.90909
ENSG00000064933	8.40481	4.60204	4.70556	3.81197	3.37222	3.54073
ENSG00000064961	2.66188	2.85406	9.55247	3.87174	5.0528	2.32483
ENSG00000064989	1.50479	4.53864	5.50168	6.02714	4.07652	7.36319
ENSG00000064995	12.9336	9.56817	13.6229	8.75508	14.2178	7.45529
ENSG00000064999	3.92217	9.56114	3.59395	8.93478	6.38661	7.67496
ENSG00000065000	19.8718	8.26512	10.5979	7.59561	16.4813	7.97433
ENSG00000065029	7.37981	5.79264	5.28654	4.45631	3.72226	3.65605
ENSG00000065054	4.93091	24.0299	69.8989	28.1438	27.3505	23.623
ENSG00000065057	1.18852	2.23721	6.06213	1.8725	2.78957	2.62306
ENSG00000065060	14.6119	6.85454	7.94993	8.02699	10.285	7.60265
ENSG00000065135	3.18198	3.07655	4.29746	2.89735	2.27076	2.90024
ENSG00000065150	23.2499	16.8334	20.4885	12.1478	12.9362	11.6234
ENSG00000065154	9.22102	44.7057	7.02665	9.39406	1.53737	13.9029
ENSG00000065183	3.80316	4.11166	1.74249	2.98446	3.0391	3.49075
ENSG00000065243	5.11945	8.33329	6.08575	8.14841	9.10936	12.5547
ENSG00000065268	7.88246	4.99169	10.2816	6.81835	10.2985	5.7982
ENSG00000065308	10.1232	13.3551	4.78135	9.33368	6.79318	10.0403
ENSG00000065320	0.430397	3.60597	1.02256	2.42296	3.14692	2.8223
ENSG00000065325	0	0.63908	0.502569	0.187962	0	0.687265
ENSG00000065328	3.44846	0.0843047	2.17342	0.275136	0.338136	0.133706
ENSG00000065357	1.06714	1.1862	0.853023	2.93328	0.587968	1.89047
ENSG00000065361	19.3619	37.1069	36.5012	28.4927	61.2576	27.9977
ENSG00000065371	0	0.011973	0	0.0160711	0	0
ENSG00000065413	1.4074	3.58641	1.43968	6.45454	1.52101	6.49657
ENSG00000065427	9.88608	11.4908	12.5824	10.3362	10.8208	11.0094
ENSG00000065457	3.63121	4.34101	3.58062	4.49424	2.60549	3.83515
ENSG00000065485	5.36177	16.6577	25.6322	17.3866	15.5961	13.0486
ENSG00000065491	4.09993	3.69532	6.06439	3.80314	4.70788	4.39222
ENSG00000065518	3.61717	6.37156	11.9585	4.89443	3.27186	6.93445
ENSG00000065526	9.10193	14.3006	7.74798	11.61	13.4787	15.536
ENSG00000065534	0.847669	13.1763	5.00856	9.76007	2.84776	12.6947
ENSG00000065548	15.0181	10.5245	12.5318	10.2776	14.9928	10.6392
ENSG00000065559	5.68624	5.4482	8.62323	5.7098	6.40703	6.84905
ENSG00000065600	3.47494	1.26231	2.63482	2.52496	1.32561	1.30687
ENSG00000065609	0.00794334	0.0121998	0	0	0	0
ENSG00000065613	10.53	10.7523	9.84717	9.83118	9.34793	11.8751
ENSG00000065615	2.50585	1.83307	1.26953	2.29848	1.13809	2.17246
ENSG00000065618	0.169474	0.114833	0.123318	0.143862	0.102282	0.0382234
ENSG00000065621	0.142005	0.302611	2.14438	0.502554	0.939488	0.421967
ENSG00000065665	3.20189	3.1564	1.72553	2.69473	2.1765	2.40705
ENSG00000065675	0.507735	0.902932	0.0698547	2.0714	0.310101	1.85249
ENSG00000065717	1.16007	3.68395	5.5332	3.22468	2.14777	2.25406
ENSG00000065802	3.36998	3.29235	4.61275	3.18135	1.39238	3.56835
ENSG00000065809	3.63548	19.2053	10.4772	19.079	7.92135	18.9549
ENSG00000065833	9.92054	3.98764	0.677921	4.55917	1.4638	5.32
ENSG00000065882	4.50984	4.67751	4.77825	6.1526	3.78845	6.22287
ENSG00000065883	5.64742	5.00777	4.07531	4.67607	5.9451	5.04696
ENSG00000065911	0.860631	0.883051	1.53605	1.67483	0.414506	2.04644
ENSG00000065923	3.01902	5.19749	2.18763	3.9852	2.81929	4.54137
ENSG00000065970	4.89768	5.26676	4.39484	5.05897	5.63268	2.67255
ENSG00000065978	50.7234	28.8127	52.1506	36.3423	27.1038	39.8272
ENSG00000065989	1.00956	0.879045	2.02109	1.09981	1.53744	0.873737
ENSG00000066027	18.941	23.6669	48.2092	22.2605	98.7415	24.3537
ENSG00000066032	0.451069	0	0	0.179877	0	0.0107533
ENSG00000066044	11.9521	6.5051	10.1632	6.17256	10.5798	6.17362
ENSG00000066056	0.981278	2.75964	2.83674	5.39454	2.02157	3.8774
ENSG00000066084	23.3553	15.4983	13.5703	13.1095	20.7844	14.0139
ENSG00000066117	7.93428	3.30187	4.04938	3.65214	4.29431	3.68108
ENSG00000066135	12.0978	11.4578	7.81034	15.8453	10.9959	10.6008
ENSG00000066136	3.3545	6.09572	4.64954	5.70935	7.90084	4.36016
ENSG00000066185	0.609745	2.05778	0.441917	1.45549	0.136245	1.52577
ENSG00000066230	2.5564	1.90552	10.5618	2.01012	3.98479	1.55773
ENSG00000066248	7.69466	7.78221	11.9282	4.6823	8.18288	5.45022
ENSG00000066279	32.8963	0.52171	13.2121	1.35388	7.66852	0.414296
ENSG00000066294	3.14342	4.20535	2.03756	6.77321	1.30599	6.69744
ENSG00000066322	5.99189	6.66733	10.9715	6.55521	7.65441	4.62174
ENSG00000066336	2.42579	4.56229	2.27263	6.79652	1.56588	6.13536
ENSG00000066379	3.46741	1.95928	6.62647	2.7881	3.67172	2.11832
ENSG00000066382	0.092381	0.131984	0.234668	0.147634	1.1006	0.171337
ENSG00000066405	0.540112	0.418251	7.05091	0.467843	0.353269	0.668255
ENSG00000066422	6.53266	5.40501	7.56198	5.57428	5.63894	6.62833
ENSG00000066427	1.2463	2.65292	2.77104	4.17951	1.67347	1.56491
ENSG00000066455	18.6953	14.767	19.4446	13.4568	17.1388	15.615
ENSG00000066468	5.3705	15.2474	121.579	18.6681	1.0458	14.2136
ENSG00000066557	8.84794	7.01494	4.32113	8.11526	7.34512	9.8426
ENSG00000066583	29.1025	30.4766	11.7374	24.9017	16.1219	26.3543
ENSG00000066629	0.419811	1.26532	1.71676	1.50067	0.906492	1.30887
ENSG00000066651	5.34628	5.05694	1.53269	6.11054	3.0013	6.76269
ENSG00000066654	4.91661	7.73007	7.31124	8.17939	6.65495	10.5068
ENSG00000066697	4.04395	1.97053	8.52112	1.82286	2.41325	1.71865
ENSG00000066735	0.0834122	0.768651	0.394229	1.02817	0.143863	1.00743
ENSG00000066739	5.64371	9.53908	11.7237	10.3196	8.83165	13.1954
ENSG00000066777	12.4256	11.3057	11.7383	11.415	20.6823	11.9376
ENSG00000066813	8.69079	68.466	0.663034	72.1791	18.4697	49.9021
ENSG00000066827	1.41872	1.29157	2.50676	1.19384	1.69131	1.62962
ENSG00000066855	10.2718	11.5748	8.06236	7.5553	18.0949	7.52671
ENSG00000066923	0.664775	1.63233	0.651273	1.35355	1.17886	1.15801
ENSG00000066926	4.25594	5.31506	4.48052	6.40113	5.10354	8.23603
ENSG00000066933	1.45471	4.06245	1.21522	3.70103	2.06726	3.6873
ENSG00000067048	1.02814	14.7254	8.24619	14.0756	0.0304027	0
ENSG00000067057	0.994135	1.02349	1.13889	1.95186	0.546254	2.04408
ENSG00000067064	36.4043	5.87002	5.5282	5.18598	27.038	9.82132
ENSG00000067066	3.98599	7.6738	0.72054	7.22372	4.45578	8.21304
ENSG00000067082	25.9179	11.3845	15.0428	28.0549	47.1151	46.1069
ENSG00000067113	33.1592	26.4432	32.7593	25.9079	73.4914	28.1206
ENSG00000067141	4.2133	5.74793	11.9989	5.83236	4.0927	5.30723
ENSG00000067167	73.5113	52.1061	39.3299	57.6431	128.644	65.077
ENSG00000067177	2.36007	1.77189	2.07128	2.06203	0.518054	1.30577
ENSG00000067182	13.2529	16.2552	22.114	24.469	25.8487	28.2495
ENSG00000067191	0.409602	0.224946	0.278108	0.450354	0.319687	0.331231
ENSG00000067208	3.39398	9.10824	3.97909	8.43716	4.06827	8.80489
ENSG00000067221	0.521864	0.421437	0.96498	0.446535	0.683729	0.467313
ENSG00000067225	7.73164	2.60655	18.9958	5.06314	2.00047	6.19519
ENSG00000067248	7.7822	7.74157	9.81448	7.7047	13.2188	8.82031
ENSG00000067334	1.78469	3.53599	4.04078	3.41206	3.58626	4.34997
ENSG00000067365	2.1869	3.59468	2.64121	2.26959	2.74155	1.14854
ENSG00000067369	6.11368	4.216	5.85445	4.05962	2.73751	4.70068
ENSG00000067445	1.73062	1.92502	0.149328	1.37305	0.556616	0.888759
ENSG00000067533	5.7413	1.92138	2.3317	1.68252	3.30053	2.11396
ENSG00000067560	95.7863	55.9899	68.9788	85.6482	76.5117	66.0466
ENSG00000067596	8.34718	4.27766	5.41307	4.43302	5.71293	4.26384
ENSG00000067606	1.78041	2.86904	1.55882	2.70684	1.08028	2.01963
ENSG00000067646	4.15168	1.94765	5.76782	2.48731	0	0
ENSG00000067704	37.9987	26.9235	54.454	26.5391	86.3907	28.9021
ENSG00000067715	0.295586	0.595582	0.116458	1.01374	0.310848	0.561467
ENSG00000067798	7.48491	1.256	18.7771	1.10022	0.152178	0.922345
ENSG00000067829	5.78803	5.01717	6.9527	5.47843	5.83368	4.66214
ENSG00000067836	1.11888	2.12234	3.28102	3.29236	3.13972	2.58133
ENSG00000067840	0.13793	0.679133	0.515077	1.4998	0.172229	0.615953
ENSG00000067842	0	0	0.00436443	0.0289126	0	0
ENSG00000067900	9.09915	6.8025	8.55993	10.7218	11.2173	10.9488
ENSG00000067955	3.77883	3.77308	3.91012	6.06103	2.34187	4.049
ENSG00000067992	4.13316	6.9543	2.19831	4.16014	2.42621	4.9424
ENSG00000068001	6.50945	3.8919	5.88541	7.68428	3.78347	3.90422
ENSG00000068024	3.30129	1.8351	2.87911	1.52446	2.60998	1.69107
ENSG00000068028	4.03083	3.03296	3.76313	5.85527	4.35772	3.56399
ENSG00000068078	15.0458	10.0031	89.8344	10.469	12.3425	8.81903
ENSG00000068079	7.84568	5.66162	7.13296	6.28078	7.09879	5.92739
ENSG00000068097	5.12611	2.57246	3.70492	3.2715	4.87885	2.55217
ENSG00000068120	17.5274	10.5786	8.70564	8.728	9.51865	7.55598
ENSG00000068137	3.51988	2.703	3.77218	3.68867	1.97172	2.53048
ENSG00000068305	5.57938	7.65516	4.21882	9.35271	5.13186	7.81982
ENSG00000068308	9.84456	8.22251	7.83136	8.38888	10.3932	8.08304
ENSG00000068323	12.6887	7.11063	8.58699	8.35213	10.6133	7.92665
ENSG00000068354	4.31607	2.95255	5.83585	3.51326	4.75062	2.95477
ENSG00000068366	261.342	2.63934	29.6012	5.51219	50.8104	2.39983
ENSG00000068383	9.56074	7.33463	7.94979	4.84584	6.87932	5.66263
ENSG00000068394	7.9358	5.04607	7.89952	6.39117	11.4736	6.86844
ENSG00000068400	7.93381	5.18324	2.85509	5.19017	4.93987	4.99429
ENSG00000068438	5.67187	2.94766	8.43794	2.9664	2.42968	2.44507
ENSG00000068489	5.15795	0.503815	3.0343	0.486435	0.818502	0.225072
ENSG00000068615	0.20183	0.661599	0.143428	0.678979	0.0895232	0.351121
ENSG00000068650	11.7309	8.21472	6.2313	4.82546	6.99212	5.19207
ENSG00000068654	11.7537	3.3491	7.04016	4.0801	6.51474	2.97476
ENSG00000068697	71.618	78.9031	70.486	81.4523	88.5061	82.0668
ENSG00000068724	3.21594	4.58502	5.03469	4.53482	4.90254	3.4164
ENSG00000068745	7.5652	4.22247	5.48709	4.34657	5.10484	5.93575
ENSG00000068781	0	0.188963	0.00765757	0.00563649	0	0
ENSG00000068784	7.38275	5.70961	7.86682	4.93177	4.50515	5.87284
ENSG00000068796	5.8689	2.8384	6.25743	4.45633	3.97784	3.90929
ENSG00000068831	0.697584	3.38309	0.505331	4.14126	0.655399	1.66917
ENSG00000068878	10.7681	13.4456	17.1745	13.6767	19.8647	15.2067
ENSG00000068885	1.93653	2.54825	4.52094	3.02918	0.746778	2.63875
ENSG00000068903	4.73647	6.45319	5.23021	4.86084	6.80298	5.76277
ENSG00000068912	16.5097	14.88	33.0339	16.9198	34.171	19.6417
ENSG00000068971	2.94202	2.94824	3.25797	3.29065	3.68361	2.72006
ENSG00000068976	0.123743	0.559292	0.132028	0.306122	0.0650432	0.254849
ENSG00000068985	0	0	0	0	0.974377	0
ENSG00000069011	3.85713	0.0770348	2.49586	0.110296	0.354907	0.0230777
ENSG00000069018	0.0606684	0	0.803247	0	0	0
ENSG00000069020	1.62964	7.15292	2.34485	6.80491	2.36734	7.40229
ENSG00000069122	3.43998	10.5178	9.21674	8.38192	5.92121	10.5679
ENSG00000069188	0.0106206	0.41711	0.141646	0.77153	0.266242	0.493308
ENSG00000069206	0	0	0	0	0	0
ENSG00000069248	20.7183	6.88184	15.873	9.03237	13.1945	8.98214
ENSG00000069275	93.3222	56.1102	69.6663	51.3345	122.685	61.0644
ENSG00000069329	5.57641	5.63003	5.13343	7.97735	9.22812	7.77542
ENSG00000069345	9.17548	13.3339	5.98881	12.4432	10.7411	12.7871
ENSG00000069399	1.99896	2.33595	1.2678	7.03995	7.51029	7.20619
ENSG00000069424	0.788718	1.67093	7.88931	3.14534	0.368569	5.04535
ENSG00000069431	1.42357	34.0066	43.8818	21.0881	13.4005	21.6585
ENSG00000069482	0	0	0	0	0.0766817	0
ENSG00000069493	1.73649	1.58619	0.543537	2.36221	1.11407	1.95664
ENSG00000069509	6.69673	2.18463	2.30336	2.30094	2.51175	3.0696
ENSG00000069535	92.6144	152.374	35.4692	87.1345	87.6435	104.877
ENSG00000069667	3.53448	23.6772	3.14923	13.0347	8.12583	16.1069
ENSG00000069696	0.441154	0.824043	0.378462	0.524373	1.14737	0.694873
ENSG00000069702	0.896198	14.9045	0.783795	13.1039	4.67798	13.0529
ENSG00000069764	0.126239	0.412005	0.0736596	0.173499	0.0893246	0.121006
ENSG00000069812	0	0	0.079057	0	0	0.0349659
ENSG00000069849	5.72474	2.47023	12.706	4.2243	4.4365	3.43879
ENSG00000069869	8.46542	11.9016	4.81581	12.6534	16.3348	8.53605
ENSG00000069943	3.00873	2.94765	2.37816	3.11731	2.04662	1.95637
ENSG00000069956	29.8754	11.072	16.7908	11.7909	22.9982	15.7748
ENSG00000069966	1.28285	1.92147	5.07982	2.05422	7.93435	2.60706
ENSG00000069974	4.75371	5.39008	8.24827	5.35448	5.98028	6.31245
ENSG00000069998	6.13652	8.24668	7.99391	6.15375	8.58319	4.56345
ENSG00000070010	7.29735	4.23227	4.44143	4.2832	5.75113	4.4798
ENSG00000070018	16.7637	36.1158	17.8563	19.3423	20.9556	25.2345
ENSG00000070019	0.85164	0.297859	0.157441	0.243364	0.721932	0.368564
ENSG00000070031	0.384927	0.443392	0.583963	0.595158	0.476642	0.590352
ENSG00000070047	19.4511	12.7663	9.20218	11.6925	13.8453	10.9177
ENSG00000070061	42.4361	10.2678	18.9091	14.4986	23.162	10.7534
ENSG00000070081	3.77965	2.53836	6.23385	3.29859	3.83557	4.9648
ENSG00000070087	3.78417	2.75647	1.383	2.75376	1.49166	4.4274
ENSG00000070159	8.31802	11.9851	12.3006	10.8339	12.841	12.0897
ENSG00000070182	0.0404672	0.294306	0.460023	0.271541	0.0943233	0.266508
ENSG00000070190	0.445294	0.683904	0.0253047	1.84131	0.465772	1.41338
ENSG00000070193	0.0467895	0.0718616	0.0163808	0.208994	0.0413842	0.15249
ENSG00000070214	11.57	12.808	8.04617	9.11891	14.0783	10.2758
ENSG00000070269	3.60406	2.03597	3.27717	2.10058	2.89111	2.56811
ENSG00000070366	3.56413	4.03628	2.94888	4.10265	4.18665	4.04592
ENSG00000070367	3.6047	3.74678	4.26481	4.79828	4.69694	5.60147
ENSG00000070371	1.80678	1.5853	0.593891	3.10938	5.92225	2.24691
ENSG00000070388	0.202855	0.136306	0.10061	0.0348497	0.0986815	0
ENSG00000070404	1.51586	1.61382	10.244	4.82168	3.93284	2.51857
ENSG00000070413	12.6273	8.28056	14.5225	12.1383	13.6502	8.85671
ENSG00000070423	10.1602	4.37888	4.12901	4.41	6.23039	4.49629
ENSG00000070444	2.37886	2.76729	2.6447	3.10303	3.65771	3.02331
ENSG00000070476	4.88074	8.19091	8.44276	7.51063	7.21868	7.15506
ENSG00000070495	4.7441	2.76858	1.90051	1.95441	4.79309	1.95924
ENSG00000070501	3.88149	5.06553	3.40748	4.03189	6.79182	3.90066
ENSG00000070526	0	0.211794	0.0238411	0.821277	0	0.203661
ENSG00000070540	6.5586	3.80819	6.80926	5.63458	12.5707	4.52525
ENSG00000070601	0.189101	0.617741	5.42516	0.721926	7.27215	0.492572
ENSG00000070610	11.4176	11.4089	20.3499	12.6785	15.1511	11.2747
ENSG00000070614	37.6639	10.6638	25.4678	13.9265	32.5322	8.52859
ENSG00000070669	3.02005	0.607114	0.97427	1.41253	1.00693	1.2307
ENSG00000070718	3.67023	1.68936	4.12592	1.53487	2.12048	1.94948
ENSG00000070729	0.0120652	0	0.0135167	0	0	0
ENSG00000070731	0.0341066	2.37468	0.382098	0.578124	1.06991	0.566675
ENSG00000070748	0.0046961	0	0	0	0	0
ENSG00000070756	170.512	76.9005	103.205	71.2545	151.816	65.896
ENSG00000070759	2.51274	6.81465	2.43494	4.45156	3.26336	4.7074
ENSG00000070761	5.13853	12.9028	5.30952	6.76668	9.67481	8.08553
ENSG00000070770	10.5815	10.7796	5.44297	10.1509	8.47802	8.35096
ENSG00000070778	3.36445	3.45218	3.56114	5.4061	4.54896	5.37178
ENSG00000070785	4.49166	5.88356	4.48254	4.66891	3.99651	5.42389
ENSG00000070808	0	0.360626	0.0320796	0.106258	0	0.0483081
ENSG00000070814	7.38808	2.5205	2.86733	2.0164	3.22004	2.21943
ENSG00000070831	29.1957	7.47211	12.5522	38.4774	12.6132	13.1065
ENSG00000070882	3.93516	0.851477	2.64474	2.10955	5.42736	2.47746
ENSG00000070886	0	0	0	0	0	0
ENSG00000070915	0.0113983	0.0306357	0	0.0587454	0	0.0699252
ENSG00000070950	5.01857	1.7236	1.26667	1.61862	2.69094	1.47362
ENSG00000070961	17.4471	6.03449	3.61099	7.60028	6.445	9.46852
ENSG00000070985	0.2578	0.143358	0	0	0	0
ENSG00000071051	5.4657	2.92179	19.3441	4.13638	4.38419	5.38366
ENSG00000071054	41.2072	15.5032	18.0903	13.0415	20.6148	9.88352
ENSG00000071073	2.62419	3.94329	13.2534	6.4617	2.81047	5.44379
ENSG00000071082	14.5207	6.7302	60.4003	12.8225	14.6405	12.7791
ENSG00000071127	8.66232	9.25408	20.0768	11.5929	14.0894	10.604
ENSG00000071189	4.61337	4.40019	5.32038	5.42351	3.96334	5.17536
ENSG00000071203	0	0	0	0	0	0
ENSG00000071205	0.55324	2.48372	1.06661	1.77716	0.407677	2.80655
ENSG00000071242	0.867381	3.31401	2.48517	2.78058	1.30307	3.67629
ENSG00000071243	1.85088	2.20463	3.05861	2.2467	2.56194	2.56411
ENSG00000071246	5.72839	4.51337	9.7856	6.83062	3.94789	5.90268
ENSG00000071282	0.387699	1.26199	3.07567	1.1187	0.854375	1.19217
ENSG00000071462	6.84553	2.84633	3.14371	3.26303	5.32061	2.91029
ENSG00000071537	20.1288	26.7244	18.1074	30.5837	39.6805	35.3748
ENSG00000071539	4.53121	0.0683771	3.46827	0.312737	0.574036	0.333814
ENSG00000071553	15.0359	8.44524	24.5602	11.5317	24.1561	9.94298
ENSG00000071564	7.24111	2.0908	3.53153	2.66712	3.51689	1.60808
ENSG00000071575	6.21046	5.04624	3.94537	8.06067	9.66335	5.78672
ENSG00000071626	11.4245	6.02904	7.74957	6.43943	7.89277	7.08019
ENSG00000071655	7.70412	4.38198	4.81384	3.96443	5.90239	3.31884
ENSG00000071677	0	0	0	0	0	0.306916
ENSG00000071794	5.81459	5.1364	9.74604	4.82133	8.34855	4.73458
ENSG00000071859	10.3179	4.77299	8.30047	6.26999	9.19389	4.79779
ENSG00000071889	3.2402	4.63692	3.90864	4.04493	3.37306	3.05158
ENSG00000071894	16.4329	7.96886	9.37386	11.2844	16.8812	6.76105
ENSG00000071909	0.0106911	0.160915	0.00598864	0	0.00907779	0.0721454
ENSG00000071967	1.37454	16.0578	9.31625	16.8056	3.25001	23.116
ENSG00000071991	0	1.43037	0.0694615	2.97955	0.0399384	3.04162
ENSG00000071994	6.96965	3.91754	3.65323	3.21412	2.04729	3.60754
ENSG00000072041	0	0	0	0	0	0
ENSG00000072042	28.9687	8.0533	9.62672	11.3164	20.5542	13.891
ENSG00000072062	13.3482	9.88287	9.066	8.68223	9.18739	8.76989
ENSG00000072071	1.17444	1.30343	1.47419	1.66544	0.701809	0.992894
ENSG00000072080	13.086	99.4001	0.389901	88.1452	102.09	113.415
ENSG00000072110	9.17643	8.92401	16.97	14.935	18.8635	10.3856
ENSG00000072121	6.85982	3.6973	4.89268	4.29325	5.9059	4.34724
ENSG00000072133	1.07709	0.569442	0.0116025	0.549423	0	0.651231
ENSG00000072134	2.14625	4.27759	5.12895	3.1998	4.40377	2.82549
ENSG00000072135	8.43005	8.32393	6.63726	8.00622	15.5123	7.51695
ENSG00000072163	0.334072	6.03911	0.798117	5.64653	5.78772	3.15053
ENSG00000072182	0.114048	0.0566697	0.0125263	0	0.0427227	0.0154335
ENSG00000072195	0.0206487	0.0921196	0.0660937	0.145948	0.057051	0.128182
ENSG00000072201	1.55956	2.12123	6.73714	2.15608	0.992509	1.71723
ENSG00000072210	5.71922	45.1466	12.7616	30.5491	37.9593	31.4884
ENSG00000072274	8.7237	8.10688	23.2072	10.4153	11.9726	8.24607
ENSG00000072310	16.7068	16.1069	50.6676	21.7044	16.784	11.9168
ENSG00000072315	0.766063	2.15857	0.0534981	1.06528	0.0554856	0.629076
ENSG00000072364	16.9697	26.8147	14.2389	22.2128	17.6086	25.1629
ENSG00000072401	4.46069	2.38969	4.15029	2.99241	2.96685	4.23027
ENSG00000072415	5.89564	6.87697	3.62928	6.89579	6.75844	7.31516
ENSG00000072422	32.9472	9.50358	10.793	6.3645	1.59074	5.27229
ENSG00000072501	14.4676	8.35864	8.81945	8.70564	10.9133	10.4747
ENSG00000072506	41.3015	99.8674	65.144	56.8719	42.5343	53.2179
ENSG00000072518	3.07624	3.71818	6.89531	3.87784	3.94841	4.24396
ENSG00000072571	8.14749	0.28861	2.4018	0.959269	0.835784	0.343097
ENSG00000072609	3.23274	1.07385	1.54646	1.62371	1.60789	1.46815
ENSG00000072657	0.0176841	0.0543202	0	0.0749385	0.0271113	0.103966
ENSG00000072682	4.69983	1.40293	0.868257	1.61411	1.45977	1.11503
ENSG00000072694	0.275369	6.34795	0.239777	7.23437	0.191099	4.69027
ENSG00000072736	9.07117	17.074	14.2228	11.0819	7.14591	18.3012
ENSG00000072756	4.46164	2.50961	1.68341	2.78086	2.98986	2.71653
ENSG00000072778	46.9273	81.3743	31.0027	49.9982	53.4699	75.3854
ENSG00000072786	3.5151	3.83534	1.58019	6.51509	2.73004	4.86173
ENSG00000072803	11.535	8.68101	10.8957	7.37333	7.25706	8.03915
ENSG00000072818	1.64452	2.87927	1.09443	4.42577	1.63211	2.70778
ENSG00000072832	0.187505	1.19372	9.80858	1.1555	0.329548	0.677187
ENSG00000072840	0.0739104	8.93744	32.6769	6.55529	1.96988	3.06057
ENSG00000072849	3.92139	3.95158	7.73382	4.08944	5.53379	4.58461
ENSG00000072858	0.340846	0.651005	0.0836319	1.045	0.0958521	0.971774
ENSG00000072864	0.875408	1.15313	3.87158	2.27453	1.06251	1.57289
ENSG00000072952	0.221845	1.06431	2.25047	0.996413	0.582582	0.915487
ENSG00000072954	1.92806	2.57418	3.93923	1.94913	1.31035	1.98632
ENSG00000072958	3.42012	2.28293	1.46893	2.15404	3.35039	1.96208
ENSG00000073008	7.02614	18.5847	5.13921	8.98245	28.0235	9.76271
ENSG00000073050	6.45052	2.78367	5.81774	3.14871	5.15146	2.89685
ENSG00000073060	50.8929	26.2258	14.6462	26.5105	48.1658	21.9739
ENSG00000073067	0.222273	0.409654	5.59687	0.366581	0.907709	0.107138
ENSG00000073111	5.37437	0.822112	7.9152	1.40716	2.31828	0.77687
ENSG00000073146	0.089692	0.346352	0.0071773	0.186665	0.330015	0.184721
ENSG00000073150	1.14678	3.1825	0.0212003	2.99613	5.04537	2.61205
ENSG00000073169	16.8651	26.0626	9.12142	25.8317	33.9811	18.9963
ENSG00000073282	0.0448883	0.141512	0	0.0941629	0.00334338	0.126818
ENSG00000073331	0.911597	2.21203	0.357496	2.99078	0.469112	3.56317
ENSG00000073350	3.74964	6.91818	16.1228	5.70421	23.6674	4.89358
ENSG00000073417	9.4863	12.6009	8.20998	11.0304	10.4003	10.8466
ENSG00000073464	2.90005	4.2389	2.38294	2.80569	3.12758	2.91211
ENSG00000073536	2.38867	1.34665	3.87923	1.28038	1.75632	0.800915
ENSG00000073578	14.3038	32.1317	12.3517	21.9136	25.204	23.2326
ENSG00000073584	3.32316	1.73025	2.12375	1.84892	1.83176	1.60056
ENSG00000073598	0.0888132	0	0	0	0	0
ENSG00000073605	2.38583	6.51783	0.921576	5.82842	4.80705	4.70192
ENSG00000073614	17.0802	11.5583	10.2648	13.0194	10.448	12.4734
ENSG00000073670	0.753149	0.0850532	0.103401	0.131925	0.0679204	0.0396353
ENSG00000073711	1.24938	2.26398	0.65243	2.13094	0.941276	1.47501
ENSG00000073712	6.99035	9.42034	8.93909	13.0145	17.3514	15.8053
ENSG00000073734	4.08817	59.342	0.0490134	42.6872	95.012	56.3173
ENSG00000073737	0.737288	1.0386	0.170984	0.684141	0.910467	2.11027
ENSG00000073754	8.12401	49.7108	0.046859	44.3658	9.51809	72.5142
ENSG00000073756	0.0467917	1.99169	0.365074	1.66744	0.0709477	2.53734
ENSG00000073792	15.8884	1.1767	5.01384	1.88615	18.8477	1.60854
ENSG00000073803	0.869149	6.89725	3.54527	9.47378	10.8093	13.2978
ENSG00000073849	41.8062	143.569	18.6237	90.9805	28.0262	79.9988
ENSG00000073861	0.161687	0.807062	0.0440267	0.916644	0.276482	0.826584
ENSG00000073910	1.54344	4.32774	7.43932	3.16519	3.5011	4.17402
ENSG00000073921	15.5936	35.2913	36.3964	32.5142	27.8482	32.0881
ENSG00000073969	11.0694	5.12297	9.9269	8.34656	10.2026	8.70428
ENSG00000074047	0.00719673	0.302118	0.557657	0.379152	0.0407381	0.393669
ENSG00000074054	12.0733	11.803	10.9591	12.5176	10.9455	12.0845
ENSG00000074071	10.5309	15.0398	33.1364	13.0613	20.6051	12.8519
ENSG00000074181	2.96568	1.47989	18.6215	5.83564	6.67475	4.05676
ENSG00000074201	9.01229	9.64195	12.08	9.9511	14.2897	7.94613
ENSG00000074211	0.0153167	0	0.109033	0	0.00812836	0.00880907
ENSG00000074219	3.723	3.75753	36.4787	5.66093	13.8407	3.44405
ENSG00000074266	1.54618	1.63839	2.73935	2.40444	2.25203	2.21351
ENSG00000074276	5.78232	18.4392	0.0584098	28.774	0.111839	18.0899
ENSG00000074317	0	0	0	0	0	0
ENSG00000074319	13.5874	7.74983	8.54374	5.72452	10.0426	6.88759
ENSG00000074356	3.0595	3.18837	4.06608	3.33002	3.11731	3.45728
ENSG00000074370	0.825208	2.53479	1.31899	5.67068	0.791792	2.93086
ENSG00000074410	0.5057	0.0147939	0.22032	0.033096	0.248773	0.0406256
ENSG00000074416	2.30218	17.5329	34.9823	9.05701	2.74686	10.1935
ENSG00000074527	0.604485	14.0558	2.82564	11.7762	3.53544	12.0197
ENSG00000074582	4.94592	4.42644	5.6976	4.82773	5.55369	3.19723
ENSG00000074590	8.19959	3.81698	21.6583	4.54844	5.68274	3.82314
ENSG00000074603	7.95925	3.39841	6.70288	6.89282	5.94544	5.75563
ENSG00000074621	2.11309	2.19734	2.47409	1.48139	1.34155	1.5758
ENSG00000074657	1.50155	1.87842	6.61705	2.83932	1.46806	2.00005
ENSG00000074660	0.876792	4.47057	1.97184	3.80537	2.78804	3.24474
ENSG00000074695	38.9032	49.7932	23.97	39.8294	31.5469	57.1304
ENSG00000074696	30.2009	18.8799	17.9582	15.725	23.2992	14.7621
ENSG00000074706	0.214051	0.686227	0.139691	1.28242	0.244098	1.42788
ENSG00000074755	5.78399	9.4625	7.87353	8.89896	7.46328	8.41999
ENSG00000074771	0.0172482	0	0.0322053	0	0.0366134	0
ENSG00000074800	51.0254	45.4302	40.6284	49.6723	33.9814	50.6796
ENSG00000074803	0.0137163	0.0568788	0	0.0339322	0.234871	0.0105182
ENSG00000074842	17.8623	11.8471	59.4632	16.5152	38.6893	19.4275
ENSG00000074855	3.48742	2.35214	3.85347	3.21315	5.31566	2.1915
ENSG00000074935	1.68452	10.2827	1.12702	6.27205	0.904224	7.25084
ENSG00000074964	11.325	28.6005	24.2795	19.2615	32.7867	19.207
ENSG00000074966	0.309399	1.30093	0.0378821	1.43601	0.559874	1.40022
ENSG00000075035	0.0161144	0.0123747	0.0075221	0.0184559	0	0.0288334
ENSG00000075043	0	0	0.0025739	0.00947284	0	0
ENSG00000075073	0.0613389	0.301463	0.349317	0.160174	0.104165	0.122296
ENSG00000075089	4.75707	3.21329	2.50946	3.86564	4.04575	3.6054
ENSG00000075131	1.52133	1.02101	1.94545	0.966367	0.515618	1.06858
ENSG00000075142	5.07073	1.99804	9.1381	3.42739	3.19975	3.61432
ENSG00000075151	5.15319	7.4861	5.00455	8.24762	4.92146	8.48312
ENSG00000075188	6.07185	2.43205	4.77876	2.2803	1.37739	2.21205
ENSG00000075213	2.03522	0.29151	0.159654	0.423574	0.0106377	0.34874
ENSG00000075218	7.99567	0.204031	3.85634	0.319513	0.822494	0.0827704
ENSG00000075223	0.252861	0.664522	70.7049	2.1894	0.071568	1.08586
ENSG00000075234	27.4541	51.5842	13.7619	40.0048	64.4352	42.7247
ENSG00000075239	7.26302	70.8625	33.7796	50.3307	33.0844	56.2518
ENSG00000075240	5.94103	9.00272	5.38828	11.0685	19.2383	13.6453
ENSG00000075275	0.914486	1.12572	6.87366	1.80682	1.23576	1.41096
ENSG00000075290	0.425251	0.204901	0.210181	0.160437	0.177	0.319704
ENSG00000075292	17.849	16.8908	10.9803	18.9333	18.814	21.4809
ENSG00000075303	3.57684	2.51253	3.802	2.8152	2.94782	2.74817
ENSG00000075336	3.04665	1.84364	2.3329	1.44996	1.55042	1.64914
ENSG00000075340	0.0194544	0.0618923	0.0674601	0.10695	0.0648948	0.0788542
ENSG00000075388	0	0	0	0	0	0
ENSG00000075391	3.09971	1.10588	4.33872	1.6066	1.84069	2.00157
ENSG00000075399	3.67825	5.13639	1.47718	4.98465	4.38381	3.50608
ENSG00000075407	8.45673	5.1141	5.28375	3.58367	3.68061	3.74312
ENSG00000075413	6.58978	4.85512	5.29227	7.15395	7.4476	5.78995
ENSG00000075415	26.38	20.8659	41.5604	19.4637	20.4505	17.2599
ENSG00000075420	20.6746	13.9515	24.7219	14.5857	21.9111	15.7635
ENSG00000075426	0.962088	8.86196	4.16246	9.51621	13.7997	11.3438
ENSG00000075429	0	0	0	0	0	0.103008
ENSG00000075461	0.0677323	0.0480123	0.374539	0.0644461	4.90321	0.271684
ENSG00000075539	4.44502	5.71886	4.75092	6.87538	4.70684	7.22471
ENSG00000075568	9.57349	7.15072	5.65837	7.73344	10.6749	8.03083
ENSG00000075618	3.09088	5.88263	8.01556	11.5574	3.79358	7.26424
ENSG00000075624	339.927	154.227	428.643	225.173	207.566	222.033
ENSG00000075643	6.02247	10.1582	2.16209	7.79925	7.55066	9.17631
ENSG00000075651	3.16765	6.83798	13.6037	6.61026	3.94202	7.91418
ENSG00000075673	0	0	10.9519	0.141666	0	0
ENSG00000075702	3.27548	0.154365	2.02913	0.254068	1.14296	0.167909
ENSG00000075711	5.74527	10.7219	6.81933	8.27011	9.69587	9.43497
ENSG00000075785	27.6762	45.5925	31.9982	38.4292	35.8918	44.2357
ENSG00000075790	2.68271	2.2515	2.09983	2.42348	3.29561	4.36814
ENSG00000075826	2.57567	3.79911	0.695907	4.24728	1.8586	2.66071
ENSG00000075856	9.6202	4.33733	6.07345	5.20278	4.87737	5.44556
ENSG00000075884	0.987155	2.54569	1.99635	5.6251	0.804567	4.82824
ENSG00000075886	1.00284	0.456988	0.751051	0.51496	0.592628	0.422538
ENSG00000075891	0	0.0519883	0	0	0	0.0173049
ENSG00000075914	5.73666	2.92268	2.36508	2.88781	2.95109	3.50224
ENSG00000075945	3.76052	4.05867	9.32351	5.7858	7.87497	6.27742
ENSG00000075975	8.12502	7.55946	6.48281	7.92889	7.13169	7.93758
ENSG00000076003	14.2448	2.60749	11.9893	3.68512	3.53429	2.89238
ENSG00000076043	2.71845	5.42547	5.55139	5.1102	4.41298	5.44699
ENSG00000076053	2.70689	4.12993	3.98666	4.24207	3.77063	4.41523
ENSG00000076067	3.16299	4.89473	2.38549	3.87447	0.953515	4.21933
ENSG00000076108	15.7216	9.23034	8.78209	9.47685	12.4608	9.40527
ENSG00000076201	9.6841	4.96531	3.22989	5.80292	9.3961	4.39833
ENSG00000076242	13.851	8.56129	5.39959	6.84567	5.94815	7.57037
ENSG00000076248	15.9296	12.728	21.5261	10.4846	18.4654	9.04847
ENSG00000076258	2.95256	26.3914	5.73502	15.9527	22.4759	21.3215
ENSG00000076321	5.19949	6.96837	5.03196	6.42913	9.80107	6.6474
ENSG00000076344	0.0110111	0.670818	0.363219	0.766751	0.0155825	0.303974
ENSG00000076351	9.19614	12.2432	12.6484	7.93904	7.14452	7.94614
ENSG00000076356	4.21571	4.18039	2.92286	3.25787	6.04186	3.67079
ENSG00000076382	19.1552	2.04137	5.5644	2.16731	3.18806	2.24578
ENSG00000076513	7.61679	6.70469	9.54686	6.65832	11.0977	8.01072
ENSG00000076554	2.59956	4.46108	7.96869	2.90543	7.72851	4.84027
ENSG00000076555	4.20925	48.6882	6.83589	21.4432	11.0837	22.78
ENSG00000076604	6.72459	3.63097	3.6559	2.97536	5.28688	3.29674
ENSG00000076641	3.81987	4.69634	1.44974	6.27089	9.69008	7.1742
ENSG00000076650	5.21484	3.45921	3.56437	2.9391	5.2031	2.96686
ENSG00000076662	8.86489	15.5589	7.27854	8.33571	5.17017	5.3651
ENSG00000076685	11.0663	8.80756	14.7444	9.84835	15.8587	10.969
ENSG00000076706	4.62207	1.4358	9.82639	3.47948	4.67069	4.15573
ENSG00000076716	1.78589	1.85948	1.12699	1.31751	1.7636	1.84051
ENSG00000076770	46.2989	34.297	4.22779	16.4614	205.17	22.7312
ENSG00000076826	21.1906	8.50206	3.33228	7.57814	17.566	6.85668
ENSG00000076864	3.13958	1.86109	10.7501	2.69998	1.67154	3.46349
ENSG00000076924	11.9651	7.77317	7.21594	8.34393	11.0022	6.75649
ENSG00000076928	9.0968	6.55503	10.0918	11.6896	13.5285	7.79672
ENSG00000076944	3.79283	3.65644	3.7207	4.47493	6.04046	3.8034
ENSG00000076984	3.19006	2.82297	3.14437	3.12359	5.05212	2.93971
ENSG00000077009	0	0	0.0432274	0.0424244	0	0.118355
ENSG00000077044	3.84794	4.3099	3.21884	4.62958	4.58081	4.02185
ENSG00000077063	0.0826074	1.99536	0.282777	2.12272	0.198381	1.5088
ENSG00000077080	0.0958288	0.203786	0.0275275	0.121573	0.542453	0.056527
ENSG00000077092	1.70531	2.65568	1.74325	2.9591	0.532541	3.9523
ENSG00000077097	26.8177	17.4659	14.1151	22.0887	21.5816	22.5623
ENSG00000077147	36.7259	27.6356	32.166	30.3221	23.9029	35.1596
ENSG00000077150	13.145	5.44678	4.45119	9.06807	10.9435	9.10728
ENSG00000077152	4.0295	0.114606	3.60265	0.19046	0.66377	0.0490471
ENSG00000077157	5.87013	6.11056	3.76198	4.71334	4.77873	2.23309
ENSG00000077232	6.44975	2.85891	6.55524	3.95718	3.49826	3.73433
ENSG00000077235	6.61799	7.02256	6.67473	6.11671	6.91475	6.13896
ENSG00000077238	4.44293	8.48945	11.8773	9.74858	9.89843	13.9534
ENSG00000077254	4.26132	8.52694	6.40474	9.01581	8.14508	9.67438
ENSG00000077264	0.60113	0.0577029	0.0717452	0.0633712	0.0120838	0.125719
ENSG00000077274	0.197426	0.36386	61.4365	2.55055	0.0209542	0.915931
ENSG00000077279	0.006904	0	0	0.0806533	0	0.0132356
ENSG00000077312	9.61448	4.18133	9.92994	5.83294	9.26774	5.97141
ENSG00000077327	0.00906117	0	0	0	0.205168	0
ENSG00000077348	3.64516	3.88981	8.7618	3.49709	9.64705	2.74079
ENSG00000077380	10.9488	6.64795	10.1341	8.7791	12.7076	9.56663
ENSG00000077420	7.93153	8.41777	21.5453	7.42326	2.89218	6.39089
ENSG00000077454	4.57386	4.24017	3.08476	5.12874	5.22995	4.71604
ENSG00000077458	1.47482	5.31806	3.38231	4.30224	4.0711	3.70575
ENSG00000077463	3.23521	1.6595	4.11168	2.22318	2.80781	1.29858
ENSG00000077498	0	0	0	0	0	0.0179102
ENSG00000077514	2.19011	1.75795	5.59071	1.21279	1.52479	2.3684
ENSG00000077522	0.0382142	0.0586913	0.0148651	0.188198	0.473194	0.126984
ENSG00000077549	18.002	19.6545	17.4157	20.1817	23.2052	21.9205
ENSG00000077585	5.682	11.8074	4.59973	9.66447	4.4576	11.9778
ENSG00000077616	0.461259	0.659954	0.126921	0.673977	0.226747	0.532428
ENSG00000077684	4.09154	2.96571	2.60597	4.28704	3.37693	3.36092
ENSG00000077713	2.77017	2.3704	8.77723	2.89039	8.0085	4.8208
ENSG00000077721	5.8412	4.02423	4.48103	4.79842	6.70275	5.26248
ENSG00000077782	0.456735	1.42249	4.94935	1.23096	0.387092	1.8595
ENSG00000077800	0.129952	0	0.221845	0.0255145	0.0577982	0.0797218
ENSG00000077935	0.211176	0.190785	1.03214	0.034145	0.146494	0.0698554
ENSG00000077942	6.73715	2.75481	2.15525	2.36881	2.56571	3.94841
ENSG00000077943	0.294754	0.273056	1.03519	0.43082	0.327741	0.516637
ENSG00000077984	1.06041	4.97314	0.954628	4.78857	2.59934	5.75022
ENSG00000078018	0.21634	0.446921	0.298691	1.18932	0.541164	1.20334
ENSG00000078043	4.56261	3.29927	4.5485	3.41497	3.78508	3.04034
ENSG00000078053	0.0343709	0.340726	0.166275	0.257663	0.123812	0.301906
ENSG00000078061	15.3885	18.3169	26.1239	16.8497	26.261	15.7926
ENSG00000078070	2.97514	14.8786	8.73216	14.7257	9.52221	13.1262
ENSG00000078081	0.484563	0.240984	0.168027	0.697678	0.143678	0.913027
ENSG00000078098	0.0955583	0.243318	2.58714	0.584082	0.128113	0.404956
ENSG00000078114	0.32115	0.633881	0.0915118	0.285389	0.0474557	0.696282
ENSG00000078124	1.37262	2.18823	1.76054	2.29359	1.92772	0.56308
ENSG00000078140	32.0915	14.1964	10.388	14.3927	9.64077	17.3947
ENSG00000078142	3.6361	2.93462	2.51296	3.22007	2.44165	3.41029
ENSG00000078177	8.4802	5.65139	5.01332	6.93486	5.00965	6.91761
ENSG00000078237	2.59092	1.18503	2.56619	2.15701	1.06709	1.84226
ENSG00000078246	8.4758	3.97924	4.49654	4.65649	4.62236	3.30285
ENSG00000078269	10.7935	3.07209	10.9136	4.23888	6.80041	3.92385
ENSG00000078295	0	0.00462657	0	0	0	0.00308001
ENSG00000078304	3.60736	5.07473	6.62396	5.39653	5.74335	4.73676
ENSG00000078328	0.0121799	0	0	0	0.061559	0
ENSG00000078369	26.0629	24.244	26.6276	24.6783	18.3659	25.4008
ENSG00000078399	0.0755811	0	0	0.0239714	0	0.0802501
ENSG00000078401	0.242543	2.23506	0.299218	2.47626	1.63038	3.24157
ENSG00000078403	10.7133	10.2346	7.71736	8.42317	10.209	9.27121
ENSG00000078487	0.801437	1.89932	0.559919	2.18105	1.38954	2.45015
ENSG00000078549	0.028354	0.324626	0.31765	0.17713	0.0364777	0.110691
ENSG00000078579	0	0	0.0389593	0.0716916	0	0.0160004
ENSG00000078589	0.205113	1.17008	0	1.46319	0.290268	2.65143
ENSG00000078596	0.841452	1.79346	1.33066	5.46369	0.753358	4.13491
ENSG00000078618	17.3374	21.7198	12.0788	19.4325	26.8202	19.4639
ENSG00000078668	32.8884	18.746	31.6673	16.9599	19.2009	16.0882
ENSG00000078674	45.7639	11.3618	11.7174	12.8296	13.992	15.0927
ENSG00000078687	3.72146	4.97804	2.99785	3.8948	6.13674	4.57234
ENSG00000078699	3.715	2.90575	3.81944	2.46459	7.64222	2.03057
ENSG00000078725	0	0.242418	0.513644	0.167345	0	0.511815
ENSG00000078747	14.2596	23.8	14.4696	19.3	43.1826	33.5217
ENSG00000078795	0.189237	0.168571	0.0671342	0.182056	0.230309	0.208964
ENSG00000078804	11.2252	14.3295	4.87625	13.9563	24.4382	13.9387
ENSG00000078808	13.1975	18.0983	11.2387	17.4649	16.2792	17.1034
ENSG00000078814	1.32783	1.20042	0.491297	0.854478	2.36929	0.851362
ENSG00000078898	1.26186	0.0427507	0	0.0765114	43.3567	0
ENSG00000078900	0.419233	0.247953	0.461889	0.518919	0.232154	0.151756
ENSG00000078902	22.5082	24.8589	17.7131	19.0494	30.4115	5.88204
ENSG00000078967	3.46752	6.30119	4.34305	4.85808	3.07223	5.4384
ENSG00000079101	0.0274733	0.0210974	0.709614	0.0692236	0.0907181	0.0561802
ENSG00000079102	0.0624528	1.03112	0.357119	1.02284	0.329587	1.33896
ENSG00000079112	0.0180573	0.0277333	0.00421451	0.173721	0.0447195	0.0761586
ENSG00000079134	3.27559	4.15619	2.8328	3.96713	4.46632	4.77701
ENSG00000079150	1.89826	2.01096	1.4359	2.13742	0.671587	2.68332
ENSG00000079156	0.944454	1.37519	0.08302	1.84378	0.477341	1.67422
ENSG00000079215	1.14966	0.349689	0.558961	1.7539	1.79403	1.99601
ENSG00000079246	46.6	33.9931	34.5579	31.1987	34.1183	30.0046
ENSG00000079257	0.960141	2.42775	3.85878	4.03921	1.3919	7.63209
ENSG00000079263	0.820262	0.663817	0.0706878	1.64765	0.459857	1.71284
ENSG00000079277	3.58973	4.87649	2.25934	4.26179	3.49581	4.08309
ENSG00000079308	5.83444	26.8343	27.5246	21.3682	22.004	24.9649
ENSG00000079313	6.85288	5.67591	6.14646	5.45778	12.2748	4.94421
ENSG00000079332	36.1887	16.1914	12.6409	14.4119	11.6606	16.3833
ENSG00000079335	1.72561	1.35837	0.340886	2.17832	1.30904	1.98697
ENSG00000079337	0.268282	0.90246	1.17473	0.629224	1.01931	0.858694
ENSG00000079385	0.570648	10.5172	0.895852	11.5889	17.464	12.546
ENSG00000079387	7.00584	3.27958	5.94431	3.26677	3.53271	3.07052
ENSG00000079393	0	0	0	0	0	0
ENSG00000079432	11.9326	6.56943	7.70955	8.39486	19.1545	8.13616
ENSG00000079435	0.219876	0.488362	0.060003	0.618327	1.14411	0.43579
ENSG00000079459	42.5263	9.89953	10.2494	6.77892	34.6516	7.46605
ENSG00000079462	8.19088	1.01021	14.1004	2.3879	7.44661	1.57979
ENSG00000079482	0.625272	0.651178	0.443806	0.912325	0.590917	1.18557
ENSG00000079557	7.0316	299.107	0.197817	260.787	142.288	203.227
ENSG00000079616	21.2779	3.28678	10.0887	3.64281	3.37528	3.15059
ENSG00000079689	3.14896	2.44554	0.499215	0.685918	2.43834	0.874773
ENSG00000079691	0.764093	1.814	6.27986	2.80868	0.993343	2.22059
ENSG00000079739	12.8984	98.6262	5.66373	61.5938	34.5837	59.0894
ENSG00000079785	36.2178	17.535	18.8857	17.4151	25.6498	20.1737
ENSG00000079805	10.2416	7.68372	6.12724	7.99208	10.4002	6.83503
ENSG00000079819	6.61072	7.82841	2.77518	8.35851	2.33519	8.42449
ENSG00000079841	0.0289192	0	0.00899951	0.00567792	0.0389765	0.0168962
ENSG00000079931	0.123103	0.781821	1.52201	2.32748	0.0988764	1.66858
ENSG00000079950	4.90473	4.0454	2.58045	5.21075	2.10937	4.91815
ENSG00000079974	3.49208	2.12874	3.0893	2.26363	1.87655	2.33737
ENSG00000079999	11.7387	8.75915	14.3775	10.5024	11.9406	9.19198
ENSG00000080007	2.34638	0.857562	0.995703	0.155203	0	0.115463
ENSG00000080031	15.5794	5.42931	2.10809	6.91995	25.7936	7.75938
ENSG00000080166	0.0303507	0.555783	0.0174369	0.24386	0.00991179	0.196934
ENSG00000080189	4.78186	4.69145	6.15784	5.08052	7.34908	3.94898
ENSG00000080200	3.80116	4.5833	1.45168	6.10337	2.28031	6.28941
ENSG00000080224	0.386303	0.0128979	0	0.0384726	0.0158458	0.145969
ENSG00000080293	0.190188	1.39735	70.8452	2.18294	0.356438	1.7107
ENSG00000080298	0.660646	1.2326	3.94791	1.55807	1.41019	1.68547
ENSG00000080345	12.2389	7.28656	9.6223	7.26919	9.78424	8.37794
ENSG00000080371	5.3053	4.25201	2.72407	4.06303	4.09661	4.76979
ENSG00000080493	0.269043	15.092	49.0815	6.57523	1.08783	11.1156
ENSG00000080503	3.38949	10.2195	4.86107	9.86346	6.02969	10.8427
ENSG00000080511	0	0	0	0	0	0
ENSG00000080546	3.98907	6.68119	3.54115	5.45881	2.17048	5.62746
ENSG00000080561	4.69686	3.7815	1.58197	3.54802	7.32277	4.07266
ENSG00000080572	0	0	0	0	0	0
ENSG00000080573	1.60711	1.75504	1.80727	0.935853	1.58021	1.08435
ENSG00000080603	28.6797	11.1598	10.9064	9.9032	12.5173	8.89424
ENSG00000080608	11.3651	6.48447	8.25381	7.11698	9.94284	8.52064
ENSG00000080618	67.4124	467.383	226.04	260.222	242.458	275.803
ENSG00000080644	0.0221747	0	0.020702	0.0355554	0.0313808	0.0170044
ENSG00000080709	0.103128	3.51372	0.172288	2.40576	0	1.66905
ENSG00000080802	5.32916	5.18602	3.70911	3.97333	4.71797	4.73876
ENSG00000080815	7.96159	5.31041	5.59652	8.2656	8.53852	5.55812
ENSG00000080819	4.86029	6.36841	2.82831	9.57041	4.40291	8.04743
ENSG00000080822	8.91828	8.58534	7.16311	10.9533	6.04767	8.82685
ENSG00000080823	0.321907	0.573111	0.636939	0.737363	0.342229	0.48142
ENSG00000080824	193.838	88.1499	64.7827	56.1818	88.7118	89.2705
ENSG00000080839	2.74478	1.66261	4.2248	1.66259	2.97183	1.56953
ENSG00000080845	4.59445	3.62205	6.64067	4.50245	5.17486	4.48044
ENSG00000080854	0.0183665	0.188054	0.663005	0.471188	0.0693108	0.220651
ENSG00000080910	21.4702	137.562	1.44983	124.124	322.039	123.666
ENSG00000080986	3.04268	0.150261	3.97776	0.54457	1.05917	0.202565
ENSG00000081014	4.32901	2.49924	2.76583	2.90411	3.63376	3.16734
ENSG00000081019	2.44051	4.5455	4.51104	6.11555	3.67665	6.11546
ENSG00000081026	4.77289	7.89254	1.22603	6.81415	10.9161	9.62471
ENSG00000081041	6.42192	40.5524	6.85034	61.9115	18.6247	26.5945
ENSG00000081051	0.25397	0.497949	0.0504474	1.3145	6.94347	0.198897
ENSG00000081052	0.269154	2.00517	0.608617	4.23963	0.732114	2.07202
ENSG00000081059	2.15952	1.5804	0.365969	2.40756	1.08473	2.0237
ENSG00000081087	2.65561	2.88501	2.01921	4.9997	3.10759	5.5336
ENSG00000081138	0	0	0	0	0	0
ENSG00000081148	0.375993	0.0940819	0.934742	0.165476	0.254088	0.184658
ENSG00000081154	5.88716	4.97866	7.30879	17.2746	5.39083	19.3814
ENSG00000081177	2.1426	2.71203	7.88571	3.64805	3.4778	2.05702
ENSG00000081181	0.764719	0.693511	0.747928	0.720688	1.93766	0.379774
ENSG00000081189	1.00973	2.0777	1.94269	2.79401	2.38721	3.98409
ENSG00000081237	4.36802	8.96844	1.43104	18.6671	3.36528	17.449
ENSG00000081248	0.0171307	0	0.0026655	0.0196199	0	0.0131365
ENSG00000081277	0	0.0304828	0	0.0506586	0.0280874	0.0956673
ENSG00000081307	5.65431	7.25002	6.37693	6.42036	7.0855	7.25162
ENSG00000081320	3.00554	4.65717	1.99389	10.3764	2.5679	9.23958
ENSG00000081377	3.29585	6.22012	1.60762	7.23641	5.98384	8.48569
ENSG00000081386	7.61699	5.36279	6.7196	4.243	5.33282	4.66185
ENSG00000081479	7.83045	0.116438	1.31951	0.110149	2.24539	0.355464
ENSG00000081665	2.9846	2.26302	1.72927	2.76147	2.55317	2.92107
ENSG00000081692	5.28516	2.65768	5.82191	2.27728	5.4117	3.88699
ENSG00000081721	7.35599	2.82442	9.2188	2.55492	7.19925	2.45254
ENSG00000081760	1.64461	0.35964	1.49759	0.652675	2.99015	0.572259
ENSG00000081791	9.50559	9.6791	13.5453	11.6913	9.28531	11.2465
ENSG00000081800	0	0	0	0	0	0
ENSG00000081803	4.88022	4.2885	1.00441	3.79186	2.29556	6.0005
ENSG00000081818	0.340698	0.353555	2.09325	0.240449	1.10762	0.72023
ENSG00000081842	0.186642	0	0.0160843	0.031571	0.540448	0.0704611
ENSG00000081853	0.125714	0.659681	0.77265	0.597519	7.53503	0.566362
ENSG00000081870	3.74411	5.1904	2.91626	4.51003	3.75056	3.95615
ENSG00000081913	7.97881	10.0324	2.35588	8.20713	15.2059	9.54844
ENSG00000081923	7.96828	4.39493	8.7257	6.73265	19.989	7.63989
ENSG00000081985	0.919738	0.727692	0.36056	0.88648	0.315534	0.757194
ENSG00000082014	6.88425	1.42571	3.68163	1.30375	0.69999	1.16909
ENSG00000082068	5.03869	4.12294	3.70438	4.51466	4.24506	4.77706
ENSG00000082074	1.91028	3.95466	0.852693	6.99292	1.49811	6.68044
ENSG00000082126	0.032188	0.043943	0.113523	0.088476	0.0303674	0.0219404
ENSG00000082146	17.3931	31.2433	7.57129	14.4457	18.5413	14.8706
ENSG00000082153	28.5121	21.3498	21.6893	27.5888	25.7107	28.101
ENSG00000082175	0.0034297	0.579426	0.159029	0.391234	0.0242679	0.485678
ENSG00000082196	1.39859	2.02701	1.73787	1.83418	7.70087	2.21295
ENSG00000082212	2.2345	1.45367	3.0001	2.52417	4.22391	2.69039
ENSG00000082213	10.9622	6.47	5.92295	4.94272	6.53504	5.41856
ENSG00000082258	6.15132	6.11169	4.24372	6.00213	5.44756	5.97812
ENSG00000082269	2.19527	1.4738	2.88634	1.8034	1.08733	2.09917
ENSG00000082293	0.0993184	0.143005	0	0.37253	0.0263534	0.0856812
ENSG00000082397	0.873087	1.62685	0.432476	2.24121	0.553449	2.05171
ENSG00000082438	13.7896	18.0329	6.39907	12.4327	17.8359	18.2337
ENSG00000082458	0.372683	0.427565	1.85074	0.891726	0.190629	1.08806
ENSG00000082482	0	0.103761	0	0	0	0.0207227
ENSG00000082497	0.0322122	0.212734	0.0691675	0.159377	0.0227927	0.128448
ENSG00000082512	1.97536	1.05526	3.57354	2.36075	3.07721	1.66147
ENSG00000082515	4.34994	3.1684	4.73528	2.48143	2.79167	2.81521
ENSG00000082516	12.112	5.69535	8.11103	5.06646	6.8615	5.39502
ENSG00000082556	0	0.0141409	0	0.231992	0	0.127088
ENSG00000082641	24.8752	61.2955	25.4501	43.6238	71.543	49.4038
ENSG00000082684	0.275001	0.254051	6.82187	0.272807	0.579367	0.149044
ENSG00000082701	6.87056	9.94197	7.6197	9.37737	8.43654	10.1531
ENSG00000082781	8.19742	14.2891	33.9782	15.3958	14.8362	12.2119
ENSG00000082805	3.86582	3.62257	6.68777	3.2004	3.40999	3.88785
ENSG00000082898	18.758	9.89426	10.0249	10.8447	15.0279	13.3797
ENSG00000082996	9.02078	16.3323	18.7475	9.24845	8.80996	13.5229
ENSG00000083067	0.0813658	0.256723	0.0445864	0.296583	0.0713403	0.210242
ENSG00000083093	3.78028	3.34454	5.16741	3.14074	3.89022	3.05533
ENSG00000083097	6.06064	3.99847	6.65161	7.68379	2.82833	8.02596
ENSG00000083099	4.95299	3.54954	4.13341	3.24325	1.26345	3.0715
ENSG00000083123	5.28182	27.8043	7.23703	17.4434	5.58914	19.5914
ENSG00000083168	5.20554	5.095	4.30215	5.61051	5.59562	5.84861
ENSG00000083223	8.4678	34.0194	5.83653	26.4765	24.654	27.2825
ENSG00000083290	0.339934	2.19552	0.631375	1.95976	1.5951	1.53386
ENSG00000083307	0.017436	0.776595	0.016278	0.483263	0.0411247	1.18553
ENSG00000083312	10.8409	9.20458	8.2609	9.87766	10.7889	10.7385
ENSG00000083444	14.0651	19.1006	17.7171	16.6328	19.8623	16.5149
ENSG00000083454	0.848997	0.361486	1.4989	1.06286	0.0773222	0.509232
ENSG00000083457	0.93647	0.621628	1.83746	0.941656	1.25413	0.527433
ENSG00000083520	6.75322	6.44533	2.45967	5.97315	5.54553	6.14705
ENSG00000083535	5.83424	5.26566	2.54363	5.20142	4.01979	5.30266
ENSG00000083544	2.19051	3.11999	2.32081	2.76696	2.624	3.37695
ENSG00000083635	4.59928	2.25391	0.984001	1.75355	3.01885	2.26619
ENSG00000083642	4.57721	4.00832	3.9335	4.20605	4.15925	4.6752
ENSG00000083720	0.604649	0.664242	0.831057	1.61008	0.493202	1.51336
ENSG00000083750	7.48361	4.34736	6.90816	4.48535	3.42043	3.66723
ENSG00000083782	0	0	0	0	0	0
ENSG00000083799	1.52123	4.79595	1.61819	6.34878	3.10894	7.34116
ENSG00000083807	3.31361	63.9925	0.899379	46.0598	66.5662	45.9197
ENSG00000083812	4.21916	2.89857	3.33809	3.1194	3.66079	3.10427
ENSG00000083814	10.0218	2.51938	1.20094	1.58978	4.98149	1.49113
ENSG00000083817	6.34689	1.80594	6.32981	2.35321	3.61027	1.28663
ENSG00000083828	4.35264	6.42789	4.31565	5.26219	4.33319	5.18473
ENSG00000083838	2.66141	5.07095	4.30473	2.56141	1.93379	2.56206
ENSG00000083844	8.21359	4.34667	5.45097	1.265	5.93209	5.18103
ENSG00000083845	131.55	21.2592	236.921	25.073	58.318	19.8999
ENSG00000083857	15.0467	5.39534	3.57232	16.5743	25.051	15.7507
ENSG00000083896	7.40027	8.5464	6.78955	7.38966	9.1294	9.33318
ENSG00000083937	5.56774	7.73267	3.32416	8.2755	7.56633	10.7739
ENSG00000084070	15.1369	34.6001	10.5953	28.7624	26.0746	22.8283
ENSG00000084072	1.77391	2.41616	2.15721	2.79186	1.99162	2.35585
ENSG00000084073	12.1527	15.053	11.8105	14.2224	19.6679	15.4249
ENSG00000084090	47.6286	25.4538	51.1364	23.2655	34.1697	28.6913
ENSG00000084092	3.73866	4.04714	19.2524	5.41469	6.25411	3.66178
ENSG00000084093	5.96719	7.33177	8.10611	8.001	6.65886	8.72883
ENSG00000084110	16.4024	100.251	28.2107	49.7184	25.3671	67.8994
ENSG00000084112	4.26904	6.01518	5.7566	4.5103	2.86126	4.37169
ENSG00000084207	2.92124	9.99222	18.8067	16.5407	3.27332	15.0236
ENSG00000084234	40.1502	63.8065	49.003	52.019	49.6194	68.2797
ENSG00000084444	0.928769	1.25957	1.48781	1.33691	0.560158	1.15462
ENSG00000084453	0.328666	4.28008	0	2.31526	1.13142	2.44297
ENSG00000084463	22.1397	10.7424	8.44467	9.29417	10.2218	9.01473
ENSG00000084623	28.146	37.5521	38.2761	37.392	34.0811	29.138
ENSG00000084628	0.100227	0	0	0	0	0
ENSG00000084636	0.0303988	1.14094	2.88765	2.20906	0.3092	2.2699
ENSG00000084652	28.7916	17.7663	13.7861	14.537	12.5462	13.9198
ENSG00000084674	2502.84	2183.56	869.786	1849.68	2582.39	2076.18
ENSG00000084676	9.17952	9.31745	6.93017	8.67701	10.0316	9.35118
ENSG00000084693	6.57348	4.14177	7.57466	2.82667	2.3445	2.37725
ENSG00000084710	0.290985	0.245161	0.198699	0.17825	0.216484	0.262665
ENSG00000084731	0.401549	0.456203	0.531508	0.699293	0.190716	0.767698
ENSG00000084733	32.7618	21.8625	26.3705	21.4968	29.8496	22.1216
ENSG00000084734	10.1151	62.0033	1.24377	35.4892	5.89372	38.5555
ENSG00000084754	92.7226	99.1515	47.8677	52.8936	89.9961	75.2484
ENSG00000084764	1.45055	4.77605	1.80713	3.50045	2.12142	4.04013
ENSG00000084774	9.20458	5.30533	10.8519	5.75046	12.1412	4.15937
ENSG00000085063	13.6609	19.7512	36.8085	26.736	21.3967	26.8287
ENSG00000085117	2.6194	8.98006	3.38225	9.7493	9.70059	9.29379
ENSG00000085185	6.87589	2.90562	1.38994	2.1037	4.20762	2.32053
ENSG00000085224	6.18183	4.30426	4.09954	5.36172	6.66826	6.4108
ENSG00000085231	3.54326	2.18927	5.4676	2.80989	1.06049	3.83517
ENSG00000085265	0.661141	0.477842	0.0330071	2.3275	0.255169	1.57248
ENSG00000085274	2.51094	3.20504	3.17626	4.00851	2.45301	3.58701
ENSG00000085276	1.23232	0.674465	1.52614	0.967805	1.97664	1.43306
ENSG00000085365	4.67679	7.66488	3.08788	3.6973	8.66837	4.16819
ENSG00000085377	12.8731	9.22414	5.25302	10.165	6.26682	8.87365
ENSG00000085382	2.03593	0.813926	0.820439	1.13444	1.10876	1.14607
ENSG00000085415	2.30022	2.65024	5.00393	2.88193	5.49506	3.58449
ENSG00000085433	1.42141	2.3971	3.44577	3.57875	2.24818	2.7662
ENSG00000085449	16.295	13.4058	7.97302	11.6935	14.2499	13.0685
ENSG00000085465	1.66019	6.12164	2.25445	2.74371	1.99023	2.89341
ENSG00000085491	0.910206	1.09666	3.15728	2.73556	1.27328	1.95354
ENSG00000085511	12.2046	6.67364	6.44343	6.01699	4.44625	5.63009
ENSG00000085514	2.19471	2.19773	2.3522	3.9695	1.09327	2.82742
ENSG00000085552	0.132848	3.04829	0.128986	0.960383	12.0509	2.23306
ENSG00000085563	13.1972	12.0048	0.164238	20.2095	0.583764	14.216
ENSG00000085644	0.297925	0.734628	2.23277	0.563474	0.901245	0.930609
ENSG00000085662	1.33762	2.31303	4.29438	5.09852	1.32779	5.62311
ENSG00000085719	13.2006	16.9018	10.5129	16.3052	34.9493	17.9991
ENSG00000085721	6.89415	10.3411	9.41114	10.4535	8.56304	13.1209
ENSG00000085733	10.953	11.9919	15.3525	13.1656	17.0495	12.9233
ENSG00000085741	0.234707	1.84744	0.0958648	0.372976	0.560501	5.52321
ENSG00000085760	17.4695	12.4012	9.79919	11.0614	15.9767	9.38177
ENSG00000085788	2.43408	2.5994	4.29714	3.37022	3.82242	3.11385
ENSG00000085831	0.490954	0.309124	0.686644	0.149944	0.279509	0.150016
ENSG00000085832	7.49625	15.2139	10.3529	16.2623	11.9684	17.7625
ENSG00000085840	2.19781	0.00856729	2.10913	0.56732	0.371021	0.153993
ENSG00000085871	10.1667	18.9209	5.98317	19.8904	19.1572	17.1796
ENSG00000085872	9.96472	7.47297	3.89437	6.65951	14.6358	5.8895
ENSG00000085978	7.33305	5.14817	6.28323	5.1352	7.19993	5.37314
ENSG00000085982	9.28161	7.82892	4.76945	6.47262	7.67473	6.72039
ENSG00000085998	4.14262	8.01633	4.51207	5.49822	5.27542	4.5668
ENSG00000085999	3.76112	0.227356	1.70448	0.399366	0.287079	0.142947
ENSG00000086015	4.33497	6.64413	5.07814	4.91928	12.1808	5.24606
ENSG00000086061	61.6299	49.4275	32.3035	36.6327	74.5091	47.2601
ENSG00000086062	29.2704	32.4552	61.8719	49.4778	52.8483	36.862
ENSG00000086065	6.76416	11.5657	12.8637	11.0585	11.3763	12.3177
ENSG00000086102	12.1748	15.8035	12.284	12.408	13.5121	14.1108
ENSG00000086159	0.0961378	0.116013	0.0160273	0.117972	0.0777432	0.0473928
ENSG00000086189	5.52446	4.37992	6.18291	3.94531	4.30257	3.70862
ENSG00000086200	4.26246	3.35037	4.56156	3.64651	4.38937	4.05846
ENSG00000086205	7.71376	11.3167	0.662104	14.2092	2.84147	9.11823
ENSG00000086232	33.7802	22.8218	16.5001	16.5715	16.6189	17.1931
ENSG00000086288	0.0288813	0.033268	0.067408	0.297701	0	0.12181
ENSG00000086289	4.15049	2.99367	1.72215	5.07893	2.81064	2.03696
ENSG00000086300	1.85214	9.37186	2.91149	8.31767	4.37084	16.3833
ENSG00000086475	15.6582	11.0469	12.3475	7.07169	8.80074	6.89804
ENSG00000086504	3.54871	3.77874	6.63686	3.68377	5.84944	3.25844
ENSG00000086506	0	0	0	0	0.139486	0
ENSG00000086544	8.8234	3.83531	8.31026	4.99077	17.3162	4.97884
ENSG00000086548	0	0	0.0646428	0.0555117	0	0.230087
ENSG00000086570	0.225324	0.251175	0.261253	0.369615	0.113147	0.239672
ENSG00000086589	11.9692	7.74372	9.95545	7.3714	8.33476	6.91092
ENSG00000086598	52.4817	30.8815	36.569	22.7939	27.3617	33.1014
ENSG00000086619	4.15541	9.71187	0.66855	8.67718	15.0385	10.8165
ENSG00000086666	6.12758	9.01739	8.06886	7.62306	8.27978	9.96903
ENSG00000086696	11.2522	17.7009	15.9347	18.6174	12.7818	15.2097
ENSG00000086712	10.6728	5.92485	5.6437	4.71038	11.9523	7.38195
ENSG00000086717	0.250646	0.0076991	0.739439	0.0206687	0.15607	0.0230646
ENSG00000086730	1.36389	0.84503	1.04541	2.00228	0.312548	1.34895
ENSG00000086758	48.006	29.8808	24.5439	25.1306	33.2039	24.1275
ENSG00000086827	5.22073	6.27358	7.63794	7.06193	6.14709	6.49037
ENSG00000086848	2.9933	4.29011	5.24637	3.74539	10.2541	3.40768
ENSG00000086967	0	0	0.0221694	0.00652727	0	0.0218516
ENSG00000086991	0.207997	0.0133105	1.37816	0.0952878	0.245291	0.132916
ENSG00000087008	3.29222	6.54021	15.9107	7.18038	5.30053	6.11662
ENSG00000087053	2.81467	2.62557	6.924	2.62639	2.97315	3.14269
ENSG00000087074	7.76611	17.2618	10.6257	10.2196	9.12904	18.2677
ENSG00000087076	3.54682	24.7455	1.60429	11.9787	113.519	4.02705
ENSG00000087077	31.9338	14.6625	19.7618	14.1919	29.2441	14.9405
ENSG00000087085	2.02964	0.672062	0.0217299	2.63592	2.59558	1.3922
ENSG00000087086	3857.22	1616.38	1559.35	2074.44	2963.05	2036.29
ENSG00000087087	20.8275	10.3894	8.30515	8.68816	10.8576	7.7072
ENSG00000087088	7.61052	2.58237	15.0681	6.4367	8.42921	4.77114
ENSG00000087095	7.25055	6.64669	8.55295	6.64327	6.92998	6.04503
ENSG00000087111	4.79508	3.32329	18.8946	4.02038	3.40331	3.78301
ENSG00000087116	0.435921	5.29098	6.95428	11.9074	1.15383	7.40369
ENSG00000087128	0.214158	0.088554	0	0	0	0.037898
ENSG00000087152	13.976	6.05125	9.76338	6.46512	11.1844	5.26314
ENSG00000087157	5.47642	3.3012	5.70213	5.10873	6.43995	3.62835
ENSG00000087191	11.5507	8.54177	8.39983	7.38491	10.0907	7.14014
ENSG00000087206	6.08318	3.93233	8.04521	4.44839	5.48495	4.24022
ENSG00000087237	1.96744	11.4387	0.422411	14.4073	0.884917	6.75995
ENSG00000087245	0.521208	6.82067	10.0685	8.38498	0.500149	6.76174
ENSG00000087250	0	0	0	0	0	0
ENSG00000087253	0.281709	0.745345	0.309412	0.897978	0.626473	1.33972
ENSG00000087258	0.0539999	4.58516	0.0996267	2.50919	0.114628	2.98935
ENSG00000087263	5.6568	4.16931	2.27102	3.25154	4.06488	3.91685
ENSG00000087266	2.37655	7.73765	1.41715	5.03711	4.83694	5.29615
ENSG00000087269	8.13323	11.8799	9.1312	9.93299	12.5523	10.2294
ENSG00000087274	9.33461	12.8362	9.2478	12.5688	15.8721	12.6841
ENSG00000087299	2.65986	4.3014	3.72123	2.74084	2.97073	3.21559
ENSG00000087301	3.11406	3.72116	6.90035	4.5301	6.38421	3.99516
ENSG00000087302	10.1816	5.66741	11.4965	5.90029	4.6771	5.59773
ENSG00000087303	1.97814	4.90416	4.54489	4.0023	1.55175	5.30285
ENSG00000087338	5.24877	4.66535	7.0914	4.42068	6.85064	5.52025
ENSG00000087365	8.81688	7.28707	6.76935	7.98122	10.7243	9.07732
ENSG00000087448	1.57112	4.51373	1.7968	4.10583	4.28002	3.66753
ENSG00000087460	23.1526	15.0606	10.5014	13.5316	22.1824	12.2147
ENSG00000087470	12.9527	2.81538	7.23829	3.32369	4.25056	3.88328
ENSG00000087494	1.22548	0.0240275	0.0778955	0.0430023	0.0664181	0.0799782
ENSG00000087495	0.0144466	0.288441	0.00809228	0.0794195	0.0122666	0.186114
ENSG00000087502	8.70847	7.31186	7.30891	7.65227	9.13705	8.24723
ENSG00000087510	0	0.0360026	0	0.0241628	0	0.0539274
ENSG00000087586	14.3626	1.32094	6.60328	1.22338	7.37944	0.608801
ENSG00000087589	0.323095	0.912413	0.13298	1.90989	0.344152	1.29475
ENSG00000087842	2.34151	1.88424	1.24353	1.7632	3.41282	2.51593
ENSG00000087884	1.43203	2.38035	5.11078	3.50029	3.4118	3.54462
ENSG00000087903	0.412471	0.353924	0.985292	0.356632	0.331593	0.611807
ENSG00000087995	6.06259	3.20228	4.68882	2.98524	5.70025	2.96582
ENSG00000088002	0	0	0.0757373	0.162955	0	0.0861366
ENSG00000088035	1.71746	1.90943	3.58072	2.27234	2.33526	1.92638
ENSG00000088038	8.21904	2.86194	3.22842	2.45549	7.30622	2.55169
ENSG00000088053	0.188939	0.680426	0.583913	0.358166	0.0184399	0.519589
ENSG00000088179	3.05495	5.10135	4.10691	4.10169	3.34922	5.20229
ENSG00000088205	14.9994	7.92701	7.90106	7.33708	8.93252	9.01319
ENSG00000088247	50.1528	16.828	17.3884	13.6636	31.6558	14.4958
ENSG00000088256	9.58951	6.71623	6.97194	6.33189	8.7437	6.39951
ENSG00000088280	3.9401	4.02342	0.949269	4.828	4.96133	3.58996
ENSG00000088298	12.8109	13.9815	39.5642	20.0032	28.0384	14.9329
ENSG00000088305	1.31983	1.03398	2.00273	0.642977	1.34566	0.466672
ENSG00000088320	0.0634609	0.828464	1.71814	0.392483	0.194583	0.519085
ENSG00000088325	44.6048	2.21327	16.8786	2.27596	6.6227	1.31859
ENSG00000088356	7.51835	2.58557	9.84145	3.46451	6.89771	2.71708
ENSG00000088367	1.55279	2.26183	2.24672	1.16837	2.84921	2.15812
ENSG00000088386	3.18012	12.7686	16.582	10.7736	8.84026	8.83321
ENSG00000088387	3.16882	3.42468	4.96908	4.45477	4.86959	4.0214
ENSG00000088448	15.9393	13.7813	11.4109	18.1616	13.5012	16.7627
ENSG00000088451	7.38018	12.6825	2.06383	6.73087	7.74888	9.32627
ENSG00000088538	0.341949	0.247145	0.0638478	0.0829347	1.71362	0.101803
ENSG00000088543	2.00611	1.14916	0.956685	1.44563	2.48602	0.756707
ENSG00000088682	4.15824	13.6548	5.75276	8.22256	6.60502	8.86338
ENSG00000088726	0	0.0151864	0	0.0135896	0	0.0227473
ENSG00000088727	0.55691	0.809096	1.01736	0.703338	0.417489	0.57249
ENSG00000088756	0.023658	0.143069	0.0552168	0.073158	0.219711	0.188221
ENSG00000088766	6.92282	11.4081	5.17411	9.04123	31.145	13.8312
ENSG00000088782	0	0	0	0	0	0
ENSG00000088808	4.65606	3.0748	6.2759	2.76665	3.4362	3.21974
ENSG00000088812	48.4754	40.0003	43.9787	48.7104	190.802	39.5178
ENSG00000088826	4.55503	0.477407	1.28357	0.887283	3.57835	0.760935
ENSG00000088827	3.99505	8.33084	1.52608	11.7302	3.75119	11.8878
ENSG00000088832	30.1092	13.9065	22.1316	16.079	15.9181	19.6617
ENSG00000088833	8.77419	5.99662	5.59607	5.19194	10.7112	5.65316
ENSG00000088836	1.10217	0.0871277	0.0264808	0.0891048	0.389937	0.0435022
ENSG00000088854	2.95465	2.91655	4.52743	4.52267	6.4981	4.34807
ENSG00000088876	6.09138	1.57866	2.60263	1.65246	4.50875	3.02487
ENSG00000088881	4.96995	1.79731	0.575008	2.51342	4.3782	2.04908
ENSG00000088882	1.23	0.91627	3.14926	0.54662	0.0729615	0.271103
ENSG00000088888	24.3233	15.2824	15.8277	12.8634	20.2066	10.9654
ENSG00000088899	1.83775	3.42912	3.48015	2.14441	6.7212	2.34292
ENSG00000088926	11.2761	106.58	5.77677	57.4212	19.8172	79.2515
ENSG00000088930	41.3078	22.4198	38.6074	24.9707	44.1076	25.5941
ENSG00000088970	5.33351	5.64105	3.65632	3.5884	6.79635	4.27407
ENSG00000088986	23.2145	10.6651	43.8626	12.433	18.1876	9.03332
ENSG00000088992	2.24016	1.02514	84.6284	1.94781	3.06667	2.06141
ENSG00000089006	14.2424	7.98518	8.04159	8.55462	9.61703	10.6194
ENSG00000089009	96.3126	42.0574	192.472	43.9759	48.4533	34.4425
ENSG00000089012	0.235643	0.615251	0.241992	1.24146	0.177852	0.61438
ENSG00000089022	8.22682	3.00672	3.50978	3.2712	2.50176	2.88868
ENSG00000089041	2.95623	2.10679	1.58894	1.69762	2.89388	2.0892
ENSG00000089048	10.5794	4.76012	3.93128	4.67355	10.57	5.53442
ENSG00000089050	7.01953	10.3186	5.74854	8.65695	11.5797	9.54151
ENSG00000089053	13.2436	7.24534	9.13839	8.05327	6.63346	7.47215
ENSG00000089057	13.6853	56.4512	7.062	63.424	29.0834	48.8923
ENSG00000089060	2.04518	3.76051	1.49396	4.86708	3.9437	3.54368
ENSG00000089063	23.746	21.3556	27.175	17.1032	29.7082	21.0864
ENSG00000089091	0.22881	0.253348	0.173872	0.479016	0.161902	0.277472
ENSG00000089094	1.43489	3.35332	5.98835	3.91393	6.25463	3.04127
ENSG00000089101	0.0072154	0	0.0089816	0.00330553	0	0
ENSG00000089116	0	0	0	0	0	0
ENSG00000089123	4.41927	3.53798	7.85537	2.74941	2.8396	4.20237
ENSG00000089127	2.00417	4.50509	0.501832	3.23393	1.65741	5.87453
ENSG00000089154	42.0322	14.5741	17.8867	13.1044	19.5082	10.9668
ENSG00000089157	181.491	47.9895	539.255	78.0476	148.495	62.2393
ENSG00000089159	5.57112	7.94005	6.42646	8.60086	9.99869	7.74054
ENSG00000089163	2.47871	1.83707	3.00025	1.18837	1.85586	0.950385
ENSG00000089169	0	0	0	0.00700254	0	0.0234427
ENSG00000089177	4.31992	6.34399	2.91936	2.7272	6.77507	3.87237
ENSG00000089195	3.56312	1.93397	2.70385	1.61525	5.68259	1.42339
ENSG00000089199	0.174745	0	0.00725063	0	0.0109908	0.0178668
ENSG00000089220	185.75	646.239	185.8	442.427	376.441	537.654
ENSG00000089225	0	0	0	0.0110947	0	0.0557134
ENSG00000089234	9.82739	5.35628	6.65562	4.60716	4.95134	3.82709
ENSG00000089248	27.9379	33.9073	51.2636	34.236	40.0378	37.6877
ENSG00000089250	0	0.0226886	0	0.0332232	0	0.0638502
ENSG00000089280	42.5318	13.8614	15.4975	15.8828	18.2786	17.7448
ENSG00000089289	16.7403	13.7704	57.7548	11.2696	13.1434	9.66044
ENSG00000089327	1.60629	3.16285	3.77375	6.43691	1.41552	4.58416
ENSG00000089335	5.56799	3.17124	4.98583	5.87762	4.29392	6.12954
ENSG00000089351	2.77404	3.06793	8.33385	5.23002	7.02937	3.39994
ENSG00000089356	0.0316924	0.0324498	6.53885	0.0290379	0.0224249	0.0324039
ENSG00000089472	0.188161	1.03047	1.42612	1.36787	0.350366	1.20747
ENSG00000089486	7.89744	7.00254	1.92606	2.67663	8.87553	5.37261
ENSG00000089505	0.0841452	0.221545	0.134669	0.198251	0.289192	0.165923
ENSG00000089558	0.251321	0.0275708	0.125694	0.0678476	0.0698616	0.0757122
ENSG00000089597	56.1432	75.0377	66.7405	81.6313	121.873	73.3421
ENSG00000089639	3.47499	2.94334	2.44414	5.55895	2.25227	3.09805
ENSG00000089682	4.68475	4.49969	2.35793	3.66557	4.41162	3.66991
ENSG00000089685	3.02354	0.0992548	1.73243	0.374307	0.725109	0.148671
ENSG00000089692	0.599306	2.43387	0.150636	1.68693	0.685017	2.72207
ENSG00000089693	27.2563	39.9015	27.3463	24.0751	25.8575	28.6944
ENSG00000089723	1.39574	1.25311	1.15998	0.364299	0.937782	0.203263
ENSG00000089737	8.32191	6.89327	4.40338	8.69922	7.99648	10.1986
ENSG00000089775	1.55238	2.12324	2.36079	3.4279	1.23701	2.62378
ENSG00000089818	1.95939	2.19141	1.3771	1.48318	1.695	1.95406
ENSG00000089820	2.84354	2.58351	1.49676	5.12689	3.84542	3.73668
ENSG00000089847	0.818722	2.56928	0.345426	1.20096	0.919101	1.95592
ENSG00000089876	8.85426	6.52195	15.5413	5.9159	5.8327	5.58917
ENSG00000089902	10.1823	6.26676	7.66107	6.90737	10.2748	8.06078
ENSG00000089916	2.37721	3.06549	2.01743	3.37833	2.53557	2.05018
ENSG00000090006	0.319281	7.36885	3.66208	12.2717	1.73357	9.41704
ENSG00000090013	6.33932	44.6939	17.4142	22.2686	20.7606	22.835
ENSG00000090020	1.34421	2.2773	2.05854	2.85219	1.00954	2.18366
ENSG00000090054	7.57757	5.26422	8.07081	5.78202	5.31947	5.18179
ENSG00000090060	17.5014	10.1421	13.7196	9.27476	10.5652	9.86325
ENSG00000090061	4.20336	2.45133	1.18806	2.42914	3.00453	2.68772
ENSG00000090097	5.51208	2.75679	10.2788	3.85255	3.92691	3.4104
ENSG00000090104	1.15064	5.83378	3.57808	11.5107	4.20706	20.9666
ENSG00000090238	1.6553	3.60512	8.17647	3.90323	5.06892	3.98209
ENSG00000090263	3.2597	2.29246	5.38966	2.39179	1.25034	2.79223
ENSG00000090266	3.6393	3.36338	14.4999	5.56775	3.70993	5.56935
ENSG00000090273	8.89152	14.2716	7.41448	11.466	10.1746	11.1969
ENSG00000090316	3.49099	3.3229	5.14057	2.21234	3.96692	1.87693
ENSG00000090339	18.575	11.7573	4.74681	19.305	12.8172	21.3023
ENSG00000090372	6.60534	3.49369	5.31029	3.5318	7.50158	3.107
ENSG00000090376	0.485852	2.10882	1.04357	3.29998	0.560511	2.4433
ENSG00000090382	60.049	24.471	11.2029	90.007	481.11	67.3225
ENSG00000090402	0	0	0	0	0	0
ENSG00000090432	7.32442	8.85293	9.49494	8.13057	10.3141	8.1757
ENSG00000090447	1.66769	1.05547	1.95401	1.0491	1.56175	0.436011
ENSG00000090470	10.2381	8.13148	7.64853	7.32843	7.25574	6.3983
ENSG00000090487	8.66817	18.1874	25.2018	17.7757	22.6383	19.2057
ENSG00000090512	8.54417	53.3054	0.495499	75.9576	1.77307	56.9396
ENSG00000090520	5.26069	3.818	8.56896	5.61262	10.4713	6.16424
ENSG00000090530	0.106825	1.63102	0.419453	2.22815	0.329027	2.10094
ENSG00000090534	1.90101	2.07976	0.0850911	2.14741	3.13247	2.9355
ENSG00000090539	6.96435	13.2906	0.484284	16.0903	12.3892	10.1915
ENSG00000090554	0.495022	0.693755	0.473699	1.31816	1.09459	1.34758
ENSG00000090565	4.5608	6.03707	4.59885	6.78928	7.0066	5.1221
ENSG00000090581	5.30201	8.84201	8.44085	10.4023	10.5774	9.00068
ENSG00000090612	2.37762	3.19497	0.83283	2.36107	1.96261	3.1023
ENSG00000090615	20.3549	6.90211	9.59112	7.46123	9.7664	8.10335
ENSG00000090621	17.3923	12.2872	12.7391	13.5112	12.1374	13.13
ENSG00000090659	1.40069	1.91835	1.84414	5.24867	2.56952	4.32701
ENSG00000090661	23.5282	9.43544	25.9756	10.429	25.0689	6.78709
ENSG00000090674	5.63123	5.51057	6.11751	7.17038	8.0447	4.67667
ENSG00000090686	5.10306	7.78628	3.08666	6.36615	6.16413	7.44251
ENSG00000090776	1.22221	4.8234	2.02906	8.33305	2.46659	8.484
ENSG00000090857	6.40825	8.29508	2.79898	4.89189	4.00761	4.36663
ENSG00000090861	15.782	24.341	9.54722	19.4733	20.7994	20.8899
ENSG00000090863	9.64197	12.0658	9.7566	13.5535	8.16119	12.6937
ENSG00000090889	9.62686	0.1253	3.73572	0.683432	1.20402	0.125123
ENSG00000090905	5.13296	12.7784	6.92285	12.8881	11.9112	13.0571
ENSG00000090924	5.00556	1.56108	6.81758	2.35191	2.94183	1.38566
ENSG00000090932	0	0	0.0125598	0.0462244	0	0
ENSG00000090971	3.33808	0.125044	5.60189	0.414015	1.61305	0.26222
ENSG00000090975	2.26642	4.87736	2.5161	4.46229	5.12523	4.34862
ENSG00000090989	2.53271	4.45639	3.19776	4.68491	3.40708	5.45527
ENSG00000091009	12.4328	8.62229	8.35787	7.84448	7.76667	9.50927
ENSG00000091010	0.0548397	0	0	0	0	0.0630797
ENSG00000091039	9.59018	10.7123	9.43229	12.0673	7.06355	13.2077
ENSG00000091073	2.26329	2.39249	1.67278	1.81451	2.77291	1.83736
ENSG00000091106	0.738626	1.47027	0.616984	1.59618	0.309456	1.25951
ENSG00000091127	7.20588	2.1963	6.58971	2.2829	5.89639	2.68192
ENSG00000091128	0	0.0346953	0.0304633	0.0413964	0.0319689	0.026947
ENSG00000091129	0.189151	0.498485	0.27893	0.836016	0.136881	0.158234
ENSG00000091136	4.28794	9.73556	13.0981	12.2859	5.93035	14.9742
ENSG00000091137	0.0394716	0.0792755	0.0368501	0.0500754	0.047265	0.0419099
ENSG00000091138	0.864378	0.0799732	0.150699	0	1.10533	0
ENSG00000091140	16.6765	18.0891	10.1301	14.0085	12.3644	17.4366
ENSG00000091157	3.22494	4.3464	3.47275	4.14694	3.53799	4.51234
ENSG00000091164	6.52012	4.673	5.19069	3.95244	3.29332	4.45363
ENSG00000091181	0	0.110647	0.0323834	0.0330042	0.022656	0.270086
ENSG00000091262	19.6951	39.2786	11.5079	35.8874	42.4743	32.5003
ENSG00000091317	43.5411	30.8407	12.2384	32.7534	16.2586	36.7459
ENSG00000091409	12.5373	6.50815	18.0716	9.81387	33.9777	7.08186
ENSG00000091428	1.68718	5.72883	1.09775	6.44714	6.22252	7.41042
ENSG00000091436	2.78341	4.35918	5.72372	6.37219	9.85737	6.62542
ENSG00000091482	0.0895227	0.216061	0	0.21092	0.416264	0.0588423
ENSG00000091483	63.4122	68.337	39.943	44.2255	67.3301	48.6584
ENSG00000091490	2.53257	4.76364	10.2061	6.81268	0.941755	7.33189
ENSG00000091513	109.954	449.614	21.4705	359.967	144.511	286.21
ENSG00000091527	10.6461	18.8901	18.982	26.6916	10.5519	22.234
ENSG00000091536	0.0519455	0.289373	0.115896	0.211756	0.107152	0.249805
ENSG00000091542	20.873	37.7555	34.0516	28.3381	34.6636	26.8647
ENSG00000091583	1487.36	4259.63	88.499	3449.76	5631.78	2650.11
ENSG00000091592	0.809847	2.38413	1.01664	3.94944	1.09937	2.93957
ENSG00000091622	0.129476	3.12815	0.229356	0.974147	0.0211419	2.11303
ENSG00000091640	3.63902	5.10175	9.90166	5.24073	6.02131	7.16477
ENSG00000091651	3.0529	0.156921	1.40409	0.471817	0.451121	0.0689475
ENSG00000091656	1.58513	2.97763	0.282974	2.16466	3.24725	2.95447
ENSG00000091664	0	0	0	0	0	0
ENSG00000091704	0	0.0277784	0	0.0248577	0	0
ENSG00000091732	3.80165	4.18594	3.54916	3.32783	4.59364	3.01391
ENSG00000091831	0.400409	7.50067	0.162581	7.75324	0.28602	6.55818
ENSG00000091844	0.289828	0.356106	0.126964	0.186908	0.110426	0.229089
ENSG00000091879	1.5466	1.57691	2.85621	1.37181	1.94223	1.86967
ENSG00000091947	11.029	4.25036	20.3054	4.66643	8.11246	4.13734
ENSG00000091972	0.317941	0.135642	2.84732	0.631174	1.08318	0.614038
ENSG00000091986	0.196704	1.4526	16.2773	3.66074	1.02386	3.39493
ENSG00000092009	0.488655	0.519578	0.666757	0.490778	0.0531944	0.605316
ENSG00000092010	33.698	34.4731	30.0292	34.4768	40.2159	33.4992
ENSG00000092020	2.97229	3.68981	4.83053	3.52113	2.32894	2.93648
ENSG00000092036	6.06896	6.51938	6.93506	8.3505	6.85122	8.35044
ENSG00000092051	0.0232283	0.0152894	0.12082	0.0592878	0.00469598	0.198481
ENSG00000092054	0	0.0177736	0	0.0119286	0	0
ENSG00000092067	0	0	0	0.0622988	0	0.0869003
ENSG00000092068	1.89596	5.27304	0.952255	3.49048	0.973401	2.9123
ENSG00000092094	6.84907	4.9186	4.29544	5.37686	4.30944	4.34862
ENSG00000092096	0.481631	0.84087	0.522663	0.876924	0.495169	0.820739
ENSG00000092098	6.39799	4.9349	6.32948	4.52776	6.06281	3.39912
ENSG00000092108	9.73382	6.80392	7.7763	6.10695	6.68646	7.96982
ENSG00000092140	2.64542	1.17118	1.90723	1.8787	2.21158	1.51893
ENSG00000092148	14.5152	33.1361	22.8799	24.5115	28.6011	26.7957
ENSG00000092199	36.3074	28.9231	30.0519	24.0309	31.4	29.6655
ENSG00000092200	0.189948	0.479625	0.162304	0.331852	0.669738	0.548073
ENSG00000092201	21.9496	9.22114	12.3691	9.96758	12.9957	10.0654
ENSG00000092203	7.29399	9.31061	4.6	4.99695	10.9302	4.52112
ENSG00000092208	1.67992	1.11837	1.95	1.29926	0.804504	1.3617
ENSG00000092295	0.188599	0.296901	0.118849	0.349924	0.0733968	0.180781
ENSG00000092330	3.49351	3.86954	6.45023	6.0954	8.69314	5.14877
ENSG00000092345	0	0	0	0.0133314	0	0
ENSG00000092377	1.93151	0.685443	0	0.83459	0	0
ENSG00000092421	1.98189	4.21898	2.6531	4.26581	0.966745	5.52942
ENSG00000092439	15.4982	13.3271	10.8858	13.9717	11.3733	16.3886
ENSG00000092445	0.600153	0.798187	1.9768	0.769546	0.740019	0.50834
ENSG00000092470	2.98401	0.643343	4.94273	1.28197	0.892238	0.702039
ENSG00000092529	0.973067	3.34093	0.687914	2.8879	1.40698	3.39568
ENSG00000092531	3.03257	2.98891	2.18468	2.71977	2.68646	2.74206
ENSG00000092607	0.530458	7.8734	0.0982895	2.00348	1.61598	10.3961
ENSG00000092621	3.33598	14.1676	0.488747	9.53209	0.156824	8.09057
ENSG00000092758	0.0436531	0.374333	0.726778	0.559956	0.190477	0.200849
ENSG00000092820	17.8106	19.7146	17.6805	20.8066	5.07081	23.8568
ENSG00000092841	30.6281	14.2423	31.2657	28.7875	18.0274	17.5916
ENSG00000092847	2.29039	2.39383	4.29194	5.92615	6.73381	1.53462
ENSG00000092850	0.0445156	0.0546955	0.0332473	0.0611807	0	0.027309
ENSG00000092853	2.50275	0.0799761	1.20929	0.429403	0.327006	0.274529
ENSG00000092871	9.15691	9.50709	4.61239	9.12166	11.0203	8.73211
ENSG00000092929	0.651984	2.42487	0.494158	3.30326	0.591533	2.35176
ENSG00000092931	2.47299	2.15981	4.13579	3.45759	4.85038	3.26383
ENSG00000092964	4.98539	9.46365	12.0859	10.8607	8.86668	19.4514
ENSG00000092969	0.283763	0.561837	0.351095	0.742398	1.43211	1.40522
ENSG00000092978	4.50577	1.86784	3.79146	2.23316	3.67348	2.6235
ENSG00000093000	15.2625	10.519	11.5271	8.35091	9.96802	9.31892
ENSG00000093009	5.18535	0.0665244	3.07904	0.331666	0.700536	0.0284701
ENSG00000093010	6.43059	16.4833	6.69659	15.0483	8.1025	15.2018
ENSG00000093072	4.6292	5.33232	2.04755	11.5371	2.92049	9.90792
ENSG00000093134	37.7758	9.98612	0.363357	6.13573	11.8193	11.6785
ENSG00000093144	4.98103	6.86891	0.854181	7.01199	3.04168	8.22436
ENSG00000093167	8.45941	7.11494	1.83499	6.42369	6.27487	10.4391
ENSG00000093183	3.66928	3.19896	4.02809	3.12662	2.02207	2.70781
ENSG00000093217	19.3246	20.754	1.98029	14.4843	16.926	14.4191
ENSG00000094631	18.8495	14.1612	3.32631	19.8474	7.106	15.1016
ENSG00000094661	0	0	0	0.0119877	0	0
ENSG00000094755	0	0.977459	0.152987	0.638991	0.0269655	1.89955
ENSG00000094796	0	0	0	0	0	0
ENSG00000094804	5.06731	0.18982	3.73372	0.3615	1.16154	0.208992
ENSG00000094841	3.3039	2.07759	1.61789	1.87628	1.3762	2.56223
ENSG00000094880	17.5761	6.38396	8.14564	6.36262	8.80727	5.02391
ENSG00000094914	13.0014	8.52324	8.28398	4.97749	6.49839	4.87565
ENSG00000094916	13.5321	11.2252	26.5108	9.45595	2.08121	8.66826
ENSG00000094963	0.128785	1.87057	0.697343	4.45021	1.32783	5.72226
[truncated: 17,952 more rows]
