# Supplementary material for: High-throughput sequencing approach for the identification of lncRNA biomarkers in hepatocellular carcinoma and revealing the effect of ZFAS1/miR-150-5p on hepatocellular carcinoma progression
Source: PeerJ. 2023 Feb 23;11:e14891. doi: 10.7717/peerj.14891 (PMC9968462; doi:10.7717/peerj.14891)
Supplement: Supplemental Information 7 [file peerj-11-14891-s007.xlsx]

## Sheet: Sheet1
Characteristics	Alive(N=245)	Dead(N=132)	Total(N=377)	pvalue	FDR
Age
Mean±SD	58.24±13.23	61.76±13.73	59.47±13.50
Median[min-max]	60.00[16.00,84.00]	64.00[18.00,90.00]	61.00[16.00,90.00]
gender				0.07	0.29
FEMALE	71(18.83%)	51(13.53%)	122(32.36%)
MALE	174(46.15%)	81(21.49%)	255(67.64%)
Height
Mean±SD	167.44±8.84	167.34±13.56	167.41±10.64
Median[min-max]	167.00[147.00,196.00]	168.00[64.00,195.00]	168.00[64.00,196.00]
OS
Mean±SD	885.82±738.81	669.14±695.04	809.76±730.19
Median[min-max]	649.50[0.0e+0,3675.00]	417.50[9.00,3258.00]	598.50[0.0e+0,3675.00]
Weight
Mean±SD	73.43±20.32	71.88±17.62	72.89±19.41
Median[min-max]	69.00[40.00,172.00]	69.00[40.00,139.00]	69.00[40.00,172.00]
BMI
Mean±SD	26.03±6.37	26.30±11.43	26.12±8.39
Median[min-max]	24.62[14.53,61.67]	24.06[15.81,131.84]	24.45[14.53,131.84]
histological type				0.22	0.67
Fibrolamellar Carcinoma	3(0.80%)	0(0.0e+0%)	3(0.80%)
Hepatocellular Carcinoma	236(62.60%)	131(34.75%)	367(97.35%)
Hepatocholangiocarcinoma (Mixed)	6(1.59%)	1(0.27%)	7(1.86%)
Pathologic_T				3.7e-06	2.6e-05
T1	137(36.53%)	48(12.80%)	185(49.33%)
T2	65(17.33%)	30(8.00%)	95(25.33%)
T3	38(10.13%)	43(11.47%)	81(21.60%)
T4	3(0.80%)	10(2.67%)	13(3.47%)
TX	0(0.0e+0%)	1(0.27%)	1(0.27%)
Pathologic_N				0.39	0.67
N0	173(46.01%)	84(22.34%)	257(68.35%)
N1	2(0.53%)	2(0.53%)	4(1.06%)
NX	70(18.62%)	45(11.97%)	115(30.59%)
Pathologic_M				0.03	0.17
M0	186(49.34%)	86(22.81%)	272(72.15%)
M1	1(0.27%)	3(0.80%)	4(1.06%)
MX	58(15.38%)	43(11.41%)	101(26.79%)
Stage				9.2e-05	0.00055
Stage I	131(37.11%)	44(12.46%)	175(49.58%)
Stage II	61(17.28%)	26(7.37%)	87(24.65%)
Stage III	41(11.61%)	45(12.75%)	86(24.36%)
Stage IV	2(0.57%)	3(0.85%)	5(1.42%)
Histological grade				0.32	0.67
G1	37(9.81%)	18(4.77%)	55(14.59%)
G2	118(31.30%)	62(16.45%)	180(47.75%)
G3	81(21.49%)	43(11.41%)	124(32.89%)
G4	8(2.12%)	5(1.33%)	13(3.45%)
Not Available	1(0.27%)	4(1.06%)	5(1.33%)
